1 **Sustained Androgen Receptor signaling is a determinant of melanoma cell**  
2 **growth potential and tumorigenesis**

3

4 Min Ma<sup>1+</sup>, Soumitra Ghosh<sup>1+</sup>, Daniele Tavernari<sup>2,3</sup>, Atul Katarkar<sup>1</sup>, Andrea Clocchiatti<sup>4,5</sup>,  
5 Luigi Mazzeo<sup>1</sup>, Anastasia Samarkina<sup>1</sup>, Justine Epiney<sup>1</sup>, Yi-Ru Yu<sup>6</sup>, Ping-Chih Ho<sup>6</sup>, Mitchell  
6 P. Levesque<sup>7</sup>, Berna C. Özdemir<sup>8,9</sup>, Giovanni Ciriello<sup>2,3</sup>, Reinhard Dummer<sup>7</sup>, and G. Paolo  
7 Dotto<sup>1,4,9\*</sup>

8

9 <sup>1</sup>Department of Biochemistry, University of Lausanne, Epalinges 1066, Switzerland

10 <sup>2</sup>Department of Computational Biology, University of Lausanne, Lausanne 1015, Switzerland.

11 <sup>3</sup>Swiss Institute of Bioinformatics (SIB), Lausanne 1015, Switzerland.

12 <sup>4</sup>Cutaneous Biology Research Center, Massachusetts General Hospital, Charlestown, MA  
13 02129, USA

14 <sup>5</sup>Department of Dermatology, Harvard Medical School, Boston, MA 02125, USA

15 <sup>6</sup>Department of Oncology, University of Lausanne, Ludwig Institute for Cancer Research  
16 Lausanne, Epalinges 1066, Switzerland

17 <sup>7</sup>Department of Dermatology, University Hospital Zürich, University of Zürich, Zürich 8091,  
18 Switzerland <sup>7</sup>

19 <sup>8</sup>Department of Oncology, Centre Hospitalier Universitaire Vaudois, 1011 Lausanne,  
20 Switzerland

21 <sup>9</sup>International Cancer Prevention Institute, Epalinges 1066, Switzerland

22

23 + Co-first authors

24 \* Correspondence: [paolo.dotto@unil.ch](mailto:paolo.dotto@unil.ch)

25

26 Running Title: Androgen signaling loss suppresses melanoma growth

27

28

29

30

31

32

33

34

35

## 36 **Abstract**

37 Melanoma is a benchmark of major clinical significance for cancer development with greater  
38 aggressiveness in the male than the female population. Surprisingly little is known on the role  
39 of androgen receptor (AR) signaling in the disease. Irrespectively of expression levels, genetic  
40 and pharmacological suppression of AR activity in a large panel of melanoma cells, derived  
41 from both male and female patients, suppresses proliferation and self-renewal potential while,  
42 conversely, increased AR expression or ligand stimulation enhance proliferation. AR gene  
43 silencing in multiple melanoma lines elicits a shared gene expression signature related to  
44 interferon- and inflammatory cytokines signaling with an inverse association with DNA repair-  
45 associated genes, which is significantly linked with better patients' survival. AR plays an  
46 essential function in maintenance of genome integrity: in both cultured melanoma cells and  
47 tumors, loss of AR activity leads to chromosomal DNA breakage, leakage into the cytoplasm,  
48 and stimulator of interferon genes (STING) activation. *In vivo*, reduced tumorigenesis  
49 resulting from AR gene silencing or pharmacological inhibition is associated with intratumor  
50 macrophage infiltration and, in an immune competent mouse model, cytotoxic T cell  
51 activation. Although at different levels, androgens are produced in both male and female  
52 individuals and AR targeting provides an attractive therapy approach for improved  
53 management of melanoma irrespective of patients' sex and gender.

## 54 55 **Significance**

56 The study uncovers an essential role of androgen receptor (AR) signaling in melanoma cell  
57 expansion and tumorigenesis, with loss of AR activity inducing cellular senescence, genomic  
58 DNA breakage, a STING dependent inflammatory cascade and immune cells recruitment. Use  
59 of AR inhibitors as growth inhibitory and DNA damaging agents in melanoma cells can  
60 provide an attractive venue for new combination approaches for management of the disease.

## 61 **Introduction**

62 Malignant melanoma is the fifth-most common cancer in the world, and its incidence  
63 is rising. Among the many prognostic risk factors that have been proposed for the disease, one  
64 of the most intriguing and less understood is sex (1). In fact, melanoma is an example of  
65 primary clinical significance for investigating sex-related differences in cancer incidence and  
66 survival, with the male population having greater susceptibility than the female, across all ages  
67 (1). Although differences in lifestyle and behavior may explain the delay and higher disease  
68 stage in men at diagnosis, the female survival advantage persists even after adjusting for these  
69 and additional variables (histological subtypes, Breslow thickness, body site) (2, 3).

70 Differences in sex hormone levels and their downstream pathways play a key role in  
71 sexual dimorphism in multiple cancer types (4), including melanoma (1). As for sexual  
72 dimorphism in other cancer types (4), even for susceptibility to melanoma differences in sex  
73 hormone levels and/or downstream pathways are likely to play a key role (1). Relative to sex  
74 protein hormones, much more evidence exists on the impact of sex steroid hormones on cancer  
75 development (4). The great majority of accrued information for melanoma relates to estrogen  
76 signaling, while much less is known on androgen signaling.

77 In experimental settings, estrogen signaling was found to restrict melanocyte  
78 proliferation, enhance differentiation and suppress melanoma development (5-7). In spite of  
79 the experimental evidence, epidemiological studies on the interconnection between estrogen  
80 levels and melanoma development and progression yield conflicting conclusions (1) (7), which  
81 may be due, in part, to the difficulty in controlling for estrogen levels, which vary with the  
82 menstrual cycle, onset of menopause, use of oral contraceptives and hormone replacement  
83 therapy. Additionally, the possible interplay between estrogens and other hormones,  
84 specifically androgens, has not been taken into consideration. An interplay with frequently

85 opposite effects between estrogen and androgen signaling has been reported for several cell  
86 types (4), which may extend to melanocytes.

87         The androgen receptor (AR) is expressed in many cell types and, while most studies  
88 have focused on prostate cancer, AR signaling has been implicated in tumorigenesis in other  
89 organs, specifically breast, bladder, kidney, lung, and liver (8). Surprisingly little is known on  
90 the role of androgen receptor signaling in melanoma. As early as 1980, it has been proposed  
91 that differences in androgen levels could explain the lower survival of male melanoma patients  
92 than females (9). Since then, however, only circumstantial pharmacological evidence has been  
93 obtained, pointing to a positive role of AR signaling in development of the disease (1). For  
94 instance, in a human melanoma cell line expressing an atypical form of AR, incubation with  
95 androgens significantly stimulated proliferation, with effects that were reversed by treatment  
96 with the androgen antagonist flutamide (or its active metabolite hydroxyflutamide) (10). The  
97 nonsteroidal antiandrogen flutamide was also found to be effective in diminishing tumor  
98 growth, and increasing survival of nude mice inoculated with human melanoma cells through  
99 possibly indirect effects (11). In fact, other work reported that administration of flutamide  
100 increased murine splenocyte proliferation, and interferon secretion, in response to irradiated  
101 murine B16 melanoma cells, and when flutamide was administered with an irradiated B16  
102 vaccine, this combination improved the survival of mice implanted with non-irradiated B16  
103 cells (12). Despite the above, genetic evidence in support of an intrinsic role of AR signaling  
104 in melanoma development is missing, with the possible exception of a study of a melanoma  
105 cell line plus/minus infection with a single shRNA silencing vector, which resulted in limited  
106 AR down-modulation (13). AR signaling in this setting was implicated in control of melanoma  
107 cells invasive properties, without any effect on proliferation.

108         In this study, based on analysis of a large panel of clinical samples and melanoma cells  
109 from both male and female patients, we show that, irrespective of expression levels, genetic

110 and pharmacological suppression of AR activity triggers melanoma cell senescence and limits  
111 tumorigenesis, eliciting a gene expression signature related to interferon- and inflammatory  
112 cytokines and associated with better patients' survival. Loss of AR activity in both melanoma  
113 cells and tumors is sufficient to cause massive chromosomal DNA breakage and leakage into  
114 the cytoplasm, with a stimulator of interferon genes (STING) dependent inflammatory  
115 signaling cascade, intratumor macrophage infiltration and, in an immune competent mouse  
116 model, cytotoxic T cell activation. As androgens are produced in both male and female  
117 individuals, AR represents an attractive target for improved management of the disease in  
118 patients of the two sexes.

## 119 **Results**

### 121 **AR is heterogeneously expressed in melanocytic lesions and melanoma cells**

122  
123 Melanoma tumors are characterized by distinct phenotypic states and display  
124 significant intra and inter-tumor heterogeneity (14). Double immunofluorescence (IF) analysis  
125 of melanocytes in benign or dysplastic nevi or metastatic melanoma versus melanocytes from  
126 flanking skin showed consistently increased levels of AR expression in the melanocytic  
127 lesions, with heterogeneity of AR protein expression at the single-cell level (Figure 1A,  
128 Supplementary Figure 1). Further double IF analysis of these and additional individual lesions  
129 at three different positions within the lesions as well as melanoma tissue microarrays showed  
130 variable degrees of AR expression irrespectively of stages of neoplastic development, sex and  
131 age of patients (Figure 1B, C, Supplementary Figure 2, 3 and Supplementary Table 1).  
132 Immunohistochemical staining confirmed the IF results with prevalent nuclear AR localization  
133 in lesions with elevated and intermediate expression and more uneven localization when lowly  
134 expressed (Figure 1D, Supplementary Figure 4).

137 Immunostaining of cultured cells showed also a variation in AR protein expression  
138 among various melanoma cell lines and primary melanoma cells derived from male or female  
139 patients, with AR levels being uniformly low in primary melanocytes (Figure 1E,  
140 Supplementary Figure 5, Supplementary Table 2). As observed *in vivo*, AR localization was  
141 largely nuclear in melanoma cells with elevated expression, similar to LnCAP or 22RV.1  
142 prostate cancer cells, while in melanoma cells or primary melanocytes with low AR levels,  
143 there was limited punctate nuclear localization with prevalent peri-nuclear distribution (Figure  
144 1E, Supplementary Figure 5).

145 Variations in AR expression were further confirmed by immunoblotting with two  
146 different antibodies, with a similar pattern of bands, and by RT-qPCR analysis of melanoma  
147 cell lines, early passage primary melanoma cells and primary melanocytes, which were again  
148 found to be more lowly expressing (Supplementary Figure 6).

149

## 150 **Sustained AR expression is required for melanoma cell proliferation and self-renewal** 151 **potential**

152 The heterogeneous levels of AR expression raised the question of its biological  
153 significance. Accordingly, we silenced *AR* expression in a panel of melanoma cells harboring  
154 either *BRAF* or *NRAS* mutations individually and in combination with *TP53*, *PTEN* and/or  
155 *CDK4* mutations (Supplementary Figure 7). Irrespectively of basal levels of AR expression,  
156 silencing of the gene by two different shRNAs resulted in all cases in drastically reduced  
157 proliferation and self-renewal as assessed by cell density, clonogenicity and sphere formation  
158 assays (Figure 2A-C, Supplementary Figure 8). Effects were paralleled by decreased DNA  
159 synthesis, induction of apoptosis and cellular senescence (Figure 2D-F, Supplementary Figure  
160 9). The shRNA gene silencing effects were suppressed in melanoma cells concomitantly  
161 infected with an AR over-expressing lentivirus (Figure 2G, Supplementary Figure 10), which

162 was by itself sufficient to enhance proliferation of primary melanocytes as well as melanoma  
163 cells with low AR expression (Figure 2H).

164 As an alternative to shRNA-mediated gene silencing, we also downmodulated AR  
165 expression by a CRISPRi system (15, 16), whereby a dCas9-KRAB transcription repressor was  
166 directed to the AR promoter region by two different guide RNAs (sgRNAs). Mass infection of  
167 dCas9-KRAB expressing melanoma cells with two lentiviruses with AR-targeting sgRNAs  
168 reduced significantly AR protein levels and decreased clonogenicity, reproducing the effects  
169 of AR gene silencing (Figure 2I, J).

170

## 171 **Modulation of melanoma and melanocyte proliferation by pharmacological inhibition** 172 **and agonist stimulation**

173 AR is a fundamental target for therapy of metastatic prostate cancer, and inhibitors with  
174 multiple mechanisms of action and efficacy have been developed (17). Treatment of different  
175 melanoma cell lines with several AR inhibitors, including one that functions through both  
176 ligand-competitive and non-competitive mechanisms, AZD3514 (18), and another, pure ligand  
177 competitive inhibitor, enzalutamide (19), exerted similar growth suppressive effects although  
178 at different doses (Figure 3A). The first compound exhibited a greater potency, which we found  
179 to be associated, as previously reported for LNCaP cells (18), with down-modulation of AR  
180 expression in two of three tested cell lines (Supplementary Figure 11A). The AZD3514  
181 inhibitory effects were confirmed by treatment of a larger panel of melanoma cell lines and  
182 primary melanoma cells with different levels AR expression, consistent with the basal  
183 protective function investigated below (Figure 3B, C, Supplementary Figure 11B, C).

184 We recently reported that suppression of AR activity in human dermal fibroblasts  
185 (HDFs) by a ligand-competitive inhibitor induces expression of a battery of tumor promoting  
186 CAF effector genes, similarly to silencing of the gene (20). To assess the net effects of AR

187 inhibitors on melanoma cells in the presence of surrounding HDFs, we resorted to an *in vitro*  
188 cancer / stromal cell expansion assay based on the co-culture in matrigel of fluorescently  
189 labelled cells (20). As shown in Figure 3D, expansion of melanoma cells admixed with HDFs  
190 was significantly reduced by treatment with the AR inhibitor AZD3514, consistent with the  
191 efficacy of this compound in the *in vivo* assays shown further below.

192         Conversely to the growth suppressing effects of the AR inhibitors, proliferation of  
193 primary melanocytes and melanoma cells in charcoal-stripped medium was significantly  
194 enhanced by treatment with the AR agonist dihydrotestosterone (DHT) in a dose-dependent  
195 manner (Figure 3E, Supplementary Figure 12A). Proliferation of other melanoma cell lines and  
196 primary melanoma cells in charcoal-stripped medium was also enhanced by DHT stimulation  
197 (Figure 3F, Supplementary Figure 12B,C) and, when cultured under very sparse conditions,  
198 their expansion was very highly dependent on the hormone (Supplementary Figure 12D). Thus,  
199 besides being required, increased AR signaling is a positive determinant of melanoma cells  
200 proliferation.

201

## 202 **AR is a master regulator of melanoma gene expression**

203         AR controls transcription through both direct and indirect DNA binding mechanisms  
204 (21), which could affect intrinsic control of proliferative potential and survival of melanoma  
205 cells as well as their capability to modulate the tumor microenvironment. By transcriptomic  
206 analysis of three different melanoma lines, two with *BRAF* and one with *NRAS* mutations, we  
207 identified 155 genes that were significantly and concordantly modulated by *AR* silencing in all  
208 three (Figure 4A, Supplementary Table 3). The two most down-modulated genes were  
209 *CDCA7L*, coding for a transcriptional repressor and c-MYC interacting protein with shared  
210 oncogenic function (22, 23), and *SENP3*, coding for a protease with a key role in SUMO  
211 activation and removal, which affects activity of many DNA repair proteins as well as NF- $\kappa$ B-



212 and STING-dependent transcriptional regulation of inflammatory genes (24, 25). Top up-  
213 regulated genes included some encoding proteins with key immunomodulatory functions,  
214 *ICAM1* (26) and *TLR4* and *6* (27), RNA helicases involved in interferon signaling cascades,  
215 *DDX58* (RIG-1) and *IFIH1* (Melanoma differentiation-associated factor 5) (28), and axonal-  
216 guiding secreted proteins with an extended role in immune regulation and angiogenesis,  
217 *SEMA3A* (Semaphorin 3A) (29) and *NTN4* (Netrin 4) (30) (Figure 4A, Supplementary Table  
218 3). Genes encoding for transcriptional regulators of inflammatory signaling cascades, such as  
219 *NFKBIA*, *NFKB2*, *IRF9*, *STAT3* and *PARP9*, were also consistently up-regulated  
220 (Supplementary Table S3).

221 The analysis was extended to a panel of other melanoma cell lines and primary  
222 melanoma cells with different levels of *AR* expression by RT-qPCR. *CDCA7L* expression was  
223 down-modulated by *AR* silencing in all tested cells, while *ICAM1* was consistently up-  
224 regulated in parallel with *IL6*, a potent pro-inflammatory cytokine (Figure 4B, Supplementary  
225 Figure 13). As for "canonical" genes involved in melanoma progression, differentiation marker  
226 genes such as *TyR* and *TYRP1* were either up- or down-modulated by *AR* silencing in the  
227 various cell lines and so were the *MITF* master regulatory gene (31) and *ZEB2*, coding for a  
228 transcription factor with a role in melanogenesis upstream of *MITF* expression (32). *AXL*,  
229 coding for a receptor tyrosine kinase implicated in melanoma aggressive behavior (33) was  
230 mostly down-modulated (Figure 4B, Supplementary Figure 13).

231

### 232 **The melanoma AR-dependent gene signature is of clinical relevance**

233 By gene set enrichment analysis (GSEA) (34), gene signatures related to interferon-  
234 and inflammatory cytokines signaling as well as apoptosis were the most significantly  
235 associated with the common gene expression profile of melanoma cells with silenced *AR*, while  
236 an inverse association with DNA repair-associated gene signatures was noted (Figure 4C,

237 Supplementary Table 4). Next, we defined an AR silencing gene signature comprising the 155  
238 genes consistently modulated by AR loss in melanoma cells (Figure 4A, Supplementary Table  
239 3) and assessed its clinical relevance by computing signature scores for 469 cutaneous  
240 melanoma patients in The Cancer Genome Atlas dataset (TCGA-SKCM). Patients were  
241 stratified as having positive scores (i.e. expression profiles similar to AR-silenced cell lines) or  
242 negative scores (i.e. expression profiles similar to AR-expressing cell lines). Patient with  
243 positive scores were found to have a significantly higher survival than those with negative  
244 scores across sexes (log-rank test, p-value = 2.6e-05; Figure 4D). The findings remained  
245 significant after correcting for age, sex, genomic subtype and primary or metastatic status  
246 (multivariate Cox regression, p-value = 0.002). Using the EPIC algorithm (35), we estimated  
247 the proportion of cancer and immune cells in the TCGA-SKCM melanoma samples cohort. We  
248 found a significantly higher proportion of B cells, CD4+ and CD8+ T cells and macrophages  
249 infiltrating melanomas with positive scores for the *AR* silencing signature than in melanomas  
250 with negatives scores (Figure 4E, Supplementary Figure14A). In order to validate and refine  
251 the analysis, we used an independent approach, CIBERSORTx (36), and estimated the  
252 proportion of 22 immune cell subtypes. With this approach, we found that tumors with positive  
253 *AR* silencing scores were selectively enriched for M1-like versus M2-like macrophages, and  
254 for CD4+ memory T cells (Supplementary Figure 14B).

255 The iLINCS (Integrative LINCS; <http://www.ilincs.org/ilincs/>) portal allows  
256 comparative analysis of transcriptional profiles of various cell lines in response to different  
257 drugs. A significant concordance was found between the *AR* silencing gene signature and the  
258 iLINCS-derived transcriptional profiles of A375 melanoma cells treated with several AR  
259 inhibitors as well as compounds inhibiting the anti-apoptotic BIRC2/3 and XIAP proteins and  
260 a number of DNA damaging agents targeting the TOPO2 and TOPO 1 enzymes (Figure 4F,  
261 Supplementary Table 5).

262

263 **AR loss triggers genomic DNA breakage, cytoplasmic leakage and STING-dependent**  
264 **gene expression**

265 The "Stimulator of Interferon Genes" protein (STING) is a cytosolic DNA sensor with  
266 an important role in innate immunity (37). Its activation by the release of chromatin DNA  
267 fragments into the cytoplasm is a potent trigger of the interferon / inflammatory gene  
268 expression programs that we found to be induced by *AR* silencing in melanoma cells (38).  
269 Comet assays showed a striking induction of chromosomal DNA breakage by *AR* gene  
270 silencing in several melanoma cells, irrespective of their high or low levels of AR expression  
271 (Figure 5A), which was accompanied by increased levels of  $\gamma$ -H2AX, a marker of the DNA  
272 damage response (39) (Figure 5B, C). In parallel, *AR* silencing resulted in the abundant release  
273 of dsDNA fragments into the cytoplasm together with the induction of STING protein  
274 expression and aggregation, two signs of STING activation, as well as upregulation of the  
275 downstream immune-modulatory gene product ICAM1 (37) (Figure 5B, C). Similar  
276 observations were obtained upon treatment of melanoma cells with the AR inhibitor AZD3514  
277 (Figure 5D, E). The findings are of functional significance as induction of AR target genes  
278 with key immune-modulatory functions, such as IL6 and ICAM1, was suppressed at both  
279 protein and mRNA levels by concomitant *AR* and *STING* knock-down (Figure 6A-C). The link  
280 between AR loss and ensuing events was further supported by the fact that chromosomal DNA  
281 damage and leakage into the cytoplasm, STING activation and IL6 and ICAM1 induction were  
282 all suppressed in cells in which AR gene silencing was counteracted by over-expression (Figure  
283 6D, E).

284

285 **AR loss or inhibition results in reduced tumorigenicity with enhanced inflammatory**  
286 **infiltrations**

287 To assess the *in vivo* significance of the findings, we resorted to an orthotopic model of  
288 melanoma formation based on the intradermal injection of melanoma cells embedded in  
289 matrigel (20), which enables the assessment of early steps of tumor formation and expansion.  
290 Utilizing this assay, we found that tumorigenic expansion and proliferative activity of multiple  
291 melanoma cell lines (WM1366, A375 and SKMEL28) was significantly reduced, in male and  
292 female mice, by *AR* silencing (Figure 7A, B, Supplementary Figure 16, 17). In parallel, *AR*  
293 silencing resulted in cytoplasmic dsDNA release, STING aggregation and ICAM1 induction  
294 (Figure 7C-E). While host macrophages were mostly excluded by tumors formed by control  
295 cells, they actively infiltrated tumors formed by cells with silenced *AR* (Figure 7F;  
296 Supplementary Figure 15).

297 The findings are of likely translational significance, as suppression of tumor cell  
298 proliferation, together with dsDNA cytoplasmic release, STING activation and ICAM1  
299 induction were also observed by treatment of tumor-bearing animals with the *AR* inhibitor  
300 AZD3514 (Figure 8A-D) or by pretreatment of cells prior to injection into the animals  
301 (Supplementary Figure 18). Even in this case, this was accompanied by increased macrophage  
302 infiltration, and engulfment of cancer cell fragments by macrophages (Figure 8E, F).

303 To further elucidate whether *AR* expression can influence the immunogenicity of  
304 melanoma cells and the immune infiltrates in the tumor microenvironment (40), we resorted to  
305 an immunocompetent model system based on the injection of the mouse melanoma cell line  
306 YUMM1.7 (41) into syngeneic mice (BL6 strain). Silencing of the mouse *AR* gene by two  
307 different shRNA lentiviral vectors or treatment with *AR* inhibitors resulted in a significant  
308 reduction of proliferation similarly to what observed with the human cells (Supplementary  
309 Figure 19).

310 *In vivo*, upon intradermal injection into immune competent mice, melanoma cells with  
311 silenced *AR* formed much smaller tumors than controls, with substantially reduced melanoma

312 cell density and proliferative index (Figure 9A, B). Dissociation of tumor cells followed by  
313 FACS analysis showed a significant increase of macrophages (CD45<sup>+</sup> Gr-1<sup>-</sup> F4/80<sup>+</sup> CD11b<sup>+</sup>)  
314 in AR-silenced YUMM1.7 melanomas, consistent with what observed with human cells in  
315 immune-compromised mice (Figure 9C). While the total number of CD4<sup>+</sup> T cells (CD45<sup>+</sup> CD3<sup>+</sup>  
316 CD4<sup>+</sup>) was not significantly different, that of CD4<sup>+</sup> regulatory T cells (T<sub>Regs</sub>) (CD45<sup>+</sup> CD3<sup>+</sup>  
317 CD4<sup>+</sup> FoxP3<sup>+</sup>) was significantly decreased in in AR-silenced YUMM1.7 melanomas (Figure  
318 9D). Percentage levels of total CD8<sup>+</sup> T cells (CD45<sup>+</sup> CD3<sup>+</sup> CD8<sup>+</sup>) did not vary consistently;  
319 however, the activated fraction (CD44<sup>+</sup> population) was significantly increased with a lesser  
320 expression of co-inhibitory molecules, LAG3 and PD1, which are highly expressed by  
321 exhausted T cells (42) (Figure 9E, F). Thus, in a syngeneic mouse model, decreased  
322 tumorigenicity of melanoma cells with AR loss is associated with enhanced modulation of  
323 innate and acquired immunity.

324

## 325 **Discussion**

326 The impact of sex hormone signaling in cancer development in organs with non-  
327 reproductive functions is still poorly understood (4). We have shown here that sustained AR  
328 signaling is key for melanoma cell proliferation potential and tumorigenesis in cells from male  
329 and female individuals. In addition, irrespective of its expression levels, AR plays an essential  
330 function in these cells in maintenance of genome integrity, as its genetic or pharmacologic  
331 suppression leads to genomic DNA breakage and leakage into the cytoplasm, STING activation  
332 and ensuing pro-inflammatory and immune signaling cascade. This is in contrast with previous  
333 reports on prostate cancer cells, in which AR inhibition, while synthetically lethal with other  
334 treatments (43, 44), does not appear to be sufficient to induce DNA damage and downstream  
335 events by itself. In fact, a number of reports indicate that DNA damage can be induced in  
336 prostate cancer cells by overstimulation of AR activity (45, 46).

337 A number of convergent mechanisms are likely to be implicated in the AR dependency  
338 of melanoma cells, involving multiple genes of the AR transcriptional signature of clinical  
339 significance that we have established. Proliferation and self-renewal potential of a large set of  
340 melanoma cells was suppressed by shRNA-mediated silencing of the gene, with similar effects  
341 resulting from down-modulation by a CRISPRi approach as well pharmacological inhibition  
342 by AR inhibitors acting through both ligand-competitive and non-competitive mechanisms.  
343 AR over-expression counteracted the shRNA gene silencing effects and was by itself sufficient  
344 to promote proliferation of melanoma cells as well as primary melanocytes with low levels of  
345 endogenous AR expression. Proliferation of these cells in charcoal-treated medium was also  
346 increased in a dose dependent manner by DHT.

347 We have found a 4% AR gene mutation frequency in melanoma samples of the TCGA  
348 data basis. However, the vast majority are missense gene mutations that do not coincide with  
349 those reported in the AR gene mutation data basis and their functional significance will have  
350 to be assessed. Mutations in regulatory sequences outside the AR coding region, such as those  
351 reported the TERT promoter in melanomas (47), is another interesting possibility that will have  
352 to be examined. In term of predisposing genetic changes, the N terminus domain of the AR gene  
353 (NTD) contains two polymorphic trinucleotide repeats (short tandem repeat), CAG and GGN  
354 (C or T), coding respectively, for poly-glutamine and -glycine stretches of various length. The  
355 number of repeats in the AR gene has been positively or negatively associated with various  
356 cancer types, including prostate, breast and colon, even if in a number of cases the significance  
357 of this association has been an argument of contention (48). A possible association with  
358 melanoma susceptibility should be relatively straightforward to assess by combined cancer  
359 genomic and transcriptomic analysis utilizing the recently developed PCAWG platform (49).

360 Overall, the role that sustained AR signaling has in ensuring/promoting melanoma cells  
361 proliferation and tumorigenesis bears on the debated issue of beneficial versus detrimental

362 consequences of androgen replacement therapy (ART) for specific aging populations, in which  
363 endogenous androgen levels diminish (50). In this context, we previously showed that in  
364 stromal fibroblasts, loss of AR function, by either gene silencing or pharmacological  
365 approaches, induces senescence of these cells together with a senescence associated secretory  
366 phenotype (SASP) that can promote tumorigenesis of neighboring cancer cells (20). Thus,  
367 inhibition of AR activity can have two-edged sword effects on cancer cells versus surrounding  
368 stromal cells, while inducing in both cellular senescence. In co-culture assays of melanoma  
369 cells and dermal fibroblasts, a potent AR inhibitor exerted net beneficial effects that paralleled  
370 those observed *in vivo* on melanoma formation in the context of the tumor microenvironment.

371 Besides suppression of proliferation, another major consequence of AR gene silencing  
372 or pharmacological inhibition was dsDNA breakage in the absence of additional exogenous  
373 insults, with dsDNA leakage into the cytoplasm and ensuing STING activation. The findings  
374 are consistent with the transcriptional profiles elicited by AR gene silencing in various  
375 melanoma cell lines, which are inversely associated with DNA repair gene signatures and with  
376 the pronounced down-modulation of specific genes of likely functional significance like  
377 *SENP3* gene, coding for a SUMO-specific protease with a key role in DNA repair (24, 25).  
378 While detailed mechanisms linking AR loss to DNA damage will have to be further  
379 investigated, the resulting enhancement of endogenous DNA damage suggests that already  
380 approved AR inhibitors could be used as an alternative to conventional DNA damaging agents  
381 in new combination approaches for melanoma treatment. In support of this possibility are our  
382 further findings that, in the iLINCS database, similar gene expression profiles are triggered by  
383 treatment of melanoma cells with AR inhibitors and conventional DNA damaging agents,  
384 specifically topoisomerase inhibitors.

385 The STING pro-inflammatory signaling cascade activated by loss of AR function can  
386 be an important determinant of tumor infiltration by immune cells (37, 51, 52). Increased

387 cancer cells recognition and elimination by the immune system can be highly beneficial in a  
388 substantial fraction of melanoma patients (53). Bioinformatic analysis revealed that gene  
389 signatures related to interferon- and inflammatory cytokines signaling were among the most  
390 significantly associated with the gene expression profile elicited from AR gene silencing in  
391 multiple melanoma cell lines. Further EPIC (35) and CIBERSORTx (36) analysis showed that  
392 melanomas with positive association with the AR-silencing gene signature and better patients'  
393 survival have a higher infiltration of cells of native and acquired immunity. This is consistent  
394 with our experimental findings that AR loss results in tumors with enhanced infiltration by  
395 macrophages as well as cytotoxic T cells. As such, AR inhibition could provide as an approach  
396 to ameliorate response to immune checkpoint inhibitors, especially of "immune-excluded" and  
397 "immune desert" tumors escaping innate and acquired immunity surveillance (54). This  
398 possibility will have to be carefully evaluated in the context of the complex effects that  
399 androgens as well as estrogens have on various cells of the immune system, with multiple  
400 variables including other components of the tumor microenvironment and patients' organismic  
401 functions (55).

402         As suggested many years ago (9), differences in androgens levels between male and  
403 female populations are a likely determinant of their different susceptibility to the disease.  
404 However, our findings clearly indicate that melanoma cells of both male and female individuals  
405 are equally dependent on sustained AR signaling for proliferation, maintenance of genomic  
406 stability and tumorigenesis. As we have previously pointed out (4), the sexual dimorphism in  
407 this as other cancer types cannot be solely attributed to hormonal differences and/or their  
408 impact on individual cell types. In the present context, it is important to note that androgens  
409 are also produced in the female population and the AR responsive signature that we have found  
410 is equally predictive of clinical behavior in male and female melanoma patients.



411 At the level of individuals, the interplay between hormonal and genetic determinants of  
412 sex specification can result in a continuous spectrum of susceptibility to various diseases (56).  
413 Irrespective of sex and gender attribution, our findings point to AR signaling as a significant  
414 parameter to consider for targeted approaches to melanoma management.

415

## 416 **Methods**

### 417 **Cell Culture**

418 A list of different melanoma cell lines and primary melanoma cells derived from male and  
419 female patients is provided in Supplementary Table S2. Early passage (p5-6) primary  
420 melanoma cell cultures (M121008, M141022 and M131206) were established from discarded  
421 melanoma tissue samples by University Research Priority Program (URPP) Live Cell Biobank  
422 (University of Zurich) with required institutional approvals. WM1366, WM983A, WM1862,  
423 and WM1552C melanoma cells were a gift from Meenhard Herlyn (The Wistar Institute, US).  
424 The YUMM1.7 melanoma cell line was provided by Ping-Chih Ho. No further authentication  
425 of these cell lines was performed. Cell morphology and growth characteristics were monitored  
426 during the study and compared with published reports to ensure their authenticity.

427 All melanoma cell lines and patient-derived primary melanoma cells were maintained in  
428 Dulbecco's modified Eagle's medium (DMEM) (Thermo Fisher Scientific) supplemented with  
429 10% (v/v) fetal bovine serum (Thermo Fisher Scientific) and 1% Pen-Strep.

430 Primary melanocytes were prepared from discarded human skin samples from abdominoplasty  
431 or circumcision at the Department of Plastic Reconstructive Surgery or Pediatrics, Lausanne  
432 University Hospital, with required institutional approvals (UNIL: CER-VD 222/12) and  
433 informed consent. All cell used in this study were determined to be negative  
434 for *Mycoplasma* prior to experiments. All cell lines were used within 5 passages after thawing.

435

## 436 **Cell manipulations and treatments**

437 Lentiviral particle productions and infections were carried out as described previously (1).  
438 Details the lentiviral shRNA vectors and single guide RNA vectors used are provided in  
439 Supplementary Table S6. Two different shRNAs directed against human or mouse *AR* in the  
440 pLKO.1 lentiviral vector were used to silence the gene. Melanoma cells were infected with  
441 lentiviruses for 2 hours; two days post-infection cells were selected with 1 µg/ml of Puromycin  
442 for 3 days. RNA or protein samples were collected 5 days after infection. Mouse YUMM1.7  
443 melanoma cells used for *AR* gene silencing were previously stably infected *RFP* expressing  
444 lentiviral vector with blasticidin selection.

445 For siRNA silencing experiments, melanoma cells were transfected with *AR* and  
446 /or *STING* silencing siRNAs versus scrambled controls siRNAs by INTERFERin® (Cat. 409,  
447 Polyplus Transfection) according to manufacturer's instructions. The details of the siRNAs  
448 used in this study are provided in Supplementary Table 6.

449 For *AR* overexpression and rescue experiments, melanoma cells were stably infected  
450 with a blasticidin resistant lentiviral vector for constitutive *AR* expression (a gift of Karl-  
451 Henning Kalland, Bergen University, Bergen, Norway) or vector control. Post selection, the  
452 *AR* overexpressing melanoma cells were super-infected with an *AR* silencing or corresponding  
453 lentivirus control and selected for Puromycin resistance as described above. The cell  
454 proliferation assays were performed 5 days after the second infection.

455 For CRISPRi downmodulation of *AR* expression, A375 melanoma cells were stably  
456 infected with a dCas9-KRAB expressing lentivirus (pHAGE EF1a dCas9-KRAB (16)),  
457 utilizing puromycin for selection. Cells were subsequently super-infected with lentivirus (Lenti  
458 Guide-hygro-eGFP) (14) harboring scramble sgRNA or two sgRNAs targeting different  
459 regions of the *AR* promoter. Cells were analyzed 3 days after infection. The sequences of the  
460 sgRNAs are provided in the Supplementary Table 6.

461 For AR inhibitor treatment, 24 hours post-seeding, melanoma cells were treated with  
462 indicated concentrations of AZD3514 (Adooq Biosciences), Enzalutamide (Selleckchem) or  
463 UT155 (MedChemExpress) or DMSO solvent control as indicated. For dihydrotestosterone  
464 (DHT) treatment experiments, melanoma cells were washed 4 times in PBS after seeding and  
465 cultured for 48 hours in phenol red-free DMEM complemented with charcoal treated FBS prior  
466 to treatments with DHT (MilliporeSigma) or vehicle control (EtOH) as indicated.

467

#### 468 **Cell based assays**

469 *Cell proliferation assays* were carried out by measuring the production of ATP using the  
470 CellTiter-Glo luminescent assay (Promega) as per the manufacturer's instructions. The  
471 luminescence signals for each time point were normalized to the signal obtained at day 0.

472 *EdU incorporation assays* were carried out using Click-iT Plus EdU Imaging Kit (Thermo  
473 Fisher Scientific) following manufacturer's instructions. The number of EdU positive cells was  
474 analyzed and the data was represented as percentage EdU positive cells.

475 *Clonogenicity assays*; cells were plated on 60 mm dishes (1000 cells/well; triplicate  
476 wells/condition) and cultured for 7 days. Colonies were fixed with 4% formaldehyde and  
477 stained with 1% crystal violet. The number of clones was counted using Image J software.

478 *Sphere formation assays*; melanoma cells were plated onto 8-well chamber slides (Corning)  
479 pre-coated with Matrigel (Corning). In brief, chambers were coated with 100  $\mu$ l Matrigel per  
480 well and incubated for 1 hour at 37 °C to polymerize. 1000 melanoma cells were plated in each  
481 well. The number of spheroids was assessed 7 days after plating through an EVOS Cell  
482 Imaging System (Thermo Fisher Scientific).

483 *IncuCyte cells proliferation assays*; 1000 melanoma cells per condition were seeded in  
484 triplicate into each well of a 96-well plate and allowed to attach for 12 hrs. The plates were  
485 mounted on IncuCyte Zoom System (Essen Bioscience) and cells were allowed to grow for the

486 next 6 days. Images were captured at 4 different sectors of each well at every 2 hours for 6  
487 days and the cell confluence was calculated by IncuCyte Zoom software.

488 *Apoptosis assays*; dead and pro-apoptotic cells were assessed using the Annexin Kit (BD  
489 Biosciences). In brief, before fixation, cells were washed with annexin-binding buffer,  
490 followed by incubation for 15 minutes at RT with annexin-Cy5 dye for staining of preapoptotic  
491 cells. Following annexin incubation, cell were fixed with 4% formaldehyde and counterstained  
492 with DAPI.

493 *Senescence-associated  $\beta$ -galactosidase (SA- $\beta$ -Gal) activity* was assessed by the use of a  
494 commercially available chromogenic assay kit (Cell Signalling) as per the manufacturer's  
495 instruction.

496

#### 497 **Comet assays**

498 The extent of double-strand DNA breaks generated with or without *AR* silencing in individual  
499 melanoma cells was assessed using alkaline comet assay (single-cell-electrophoresis) as  
500 described previously (57). Images were obtained with Zeiss AxioImager Z1. Percentage of tail  
501 DNA per nuclei was calculated using Comet Score 1.6.1.13 software ([www.rexhoover.com](http://www.rexhoover.com)).

502

#### 503 **Immunofluorescence and immunohistochemistry staining**

504 Immunofluorescences staining of tissue sections and cultured cells were carried out as  
505 described previously (35). Briefly, frozen tissue sections or cultured cells on glass coverslips  
506 were fixed in cold 4% paraformaldehyde (PFA) for 15 minutes at room temperature (RT).  
507 Paraffin embedded sections were subjected to deparaffinization and antigen retrieval using  
508 citrate-based buffer system. Samples were washed with PBS followed by permeabilization with  
509 0.1% TritonX100 in PBS for 10 minutes and incubated with 2% bovine serum albumin in PBS  
510 for 2 hours at RT. Primary antibodies were diluted in fluorescence dilution buffer (2% bovine

511 serum albumin in PBS, pH7.6 and incubated over night at 4°C). List of primary antibodies and  
512 dilutions used for IF is provided in Supplementary Table 6. After washing 3 times in PBS  
513 samples were incubated with donkey fluorescence conjugated secondary antibodies  
514 (Invitrogen) for 1 hour at RT. After washing with PBS, slides were mounted with Fluoromount  
515 Mounting Medium (Sigma-Aldrich) after nuclear DAPI staining. Control staining without the  
516 primary antibodies was performed in each case to subtract background and set image  
517 acquisition parameters. Immunofluorescence images were acquired with a ZEISS AxioVision  
518 or ZEISS LSM880 confocal microscope with 20X or 40X oil immersion objectives. Axiovision  
519 or ZEN Blue software were used for acquisition and processing of images. For fluorescence  
520 signal quantification, acquired images for each color channel were imported into ImageJ  
521 software, quantified using the functions “measurement” or “particle analysis” for selection of  
522 areas or cells of interest.

523 For the melanoma tissue microarray, the mean intensity of the AR fluorescence in melanoma  
524 cells for each micro-biopsy using ImageJ. A binary image was created from the melanA-  
525 positive cells by setting a threshold to only consider melanA signal with pixel intensity between  
526 36-255. A mask was then derived from the melanA-positive area to mark melanoma cells.  
527 Mean intensity of AR fluorescence was then measured inside the mask. Data for melanoma  
528 tissue array data were plotted as average AR intensity of three fields per spotted tumor sample,  
529 each field comprising a group of approximately 50-60 cells. Each dot represents one clinical  
530 tissue sample.

531 Immunohistochemical analysis was carried out utilizing a previously described protocol for  
532 prostate cancer cells (58). Briefly, 4 µm-thick sections of formalin-fixed paraffin-embedded  
533 tissue blocks from different melanomas were subjected to de-paraffinization using xylene and  
534 hydrated in a graded series of ethanol solutions and antigen retrieval with 10 mM Tris/EDTA  
535 buffer solution (pH 9.0) at 100°C for 20 min. Parallel sections were permeabilized, blocked

536 and incubated with anti-AR antibody or anti-melanA antibodies. Chromogenic detection was  
537 carried out using a peroxidase-conjugated secondary antibody (30 min) and DAB reagents (5  
538 min). Tissue sections were counterstained with 0.1% hematoxylin. Immunohistochemical  
539 staining was performed by an experienced laboratory of pathology in our institution.

540

#### 541 **Immunoblotting and qRT-PCR**

542 Cells were lysed in RIPA buffer (10 mM Tris-Cl (pH 8.0), 1 mM EDTA, 1% Triton X-100,  
543 0.1% sodium deoxycholate, 0.1% SDS, 140 mM NaCl, 1 mM PMSF) or LDS buffer (Thermo  
544 Scientific). Equal amounts of proteins were subjected to immunoblot analysis. Membranes  
545 were sequentially probed with different antibodies as indicated in the figure legends, utilizing  
546 an ECL kit (Thermo Scientific) for detection. Details of antibodies used in this study are  
547 provided in Supplementary Table 6.

548 RT-qPCR analysis were carried out as described previously (35). A list of primers used in this  
549 study are provided in Supplementary Table 6.

550

#### 551 **Transcriptomic Analysis**

552 The transcriptional changes elicited in WM1366, SKMEL28 and WM115 melanoma cells  
553 plus/minus *AR*-silencing with two different lentiviruses versus empty vector control were  
554 assessed by Clariom™ D GeneChip array analysis (Thermo Fisher Scientific). 5 days post-  
555 infection, RNA was extracted from the melanoma cells using Direct-zol RNA MiniPrep kit  
556 (Zymo Research) coupled with DNase treatment and RNA quality was verified by Bioanalyzer  
557 (Agilent Technologies). 50 ng of total RNA was used as input for the preparation of single-  
558 strand cDNA using the GeneChip WT PLUS Reagent Kit (Thermo Fisher Scientific). Targets  
559 were then fragmented and labeled with the GeneChip WT Terminal Labeling Kit (Thermo  
560 Fisher Scientific) and hybridized on Human Clariom™ D GeneChip arrays (Thermo Fisher

561 Scientific) at the iGE3 Genomics Platform, University of Geneva (Geneva, Switzerland). Data  
562 obtained were analyzed using the TAC software (v4.0). The data generated in this study has  
563 been deposited to the public functional genomics data repository GEO (Gene Expression  
564 Omnibus), NCBI with an accession number GSE138486.

565 Gene set enrichment analysis (GSEA) for GeneChip microarray data were conducted using  
566 GSEA software using default parameters. Curated gene sets were obtained from the Molecular  
567 Signatures Database (MSigDB version 5.2, [www.broadinstitute.org/gsea/msigdb/](http://www.broadinstitute.org/gsea/msigdb/)). A list of  
568 enriched pathway gene sets is provided in Supplementary Table S4.

569

### 570 **Construction of the *AR* silencing gene signature**

571 Raw microarray expression data were preprocessed with TAC software, obtaining gene-level  
572 expression values from SST-RMA summarization. Ensemble IDs were mapped to gene  
573 symbols with Biomart. A paired differential expression analysis between control (n=3) and  
574 shAR (n=6) conditions was performed with Limma (default parameters), pairing together  
575 samples from each cell line. The AR silencing signature was constructed as the list of genes  
576 up- or down-regulated upon AR silencing, i.e. genes showing an adjusted P-value < 0.05 and  
577 an absolute log-fold change > 1 in the overall analysis as well as in each cell line separately.

578

### 579 **Computation of AR silencing signature scores in TCGA SKCM dataset**

580 Level 3 gene expression and clinical data for Skin Cutaneous Melanoma (SKCM) TCGA  
581 projects were downloaded from NIH GDC Data Portal (<https://portal.gdc.cancer.gov>). In case  
582 both primary and metastatic samples were present for the same patient, only the primary sample  
583 was retained. TPM (transcripts per million) values were transformed as log<sub>2</sub> (TPM+1). Scores  
584 for the sets of genes up- and down-regulated were computed with the R package ‘GSVA’  
585 v1.30.0 using default parameters. The difference between these scores was computed to obtain

586 a unified score for the total *AR* silencing gene signature (comprising both up- and down-  
587 regulated genes) for each patient. Each tumor was assigned with a positive (+) or negative (-)  
588 score relative to the unified *AR* silencing gene signature.

589

### 590 **Survival analysis**

591 The difference between the survival of patients with a positive (+) versus negative (-) score for  
592 the *AR* silencing gene signature was tested with a log-rank test implemented in the R package  
593 ‘survival’ v2.43-3 (<https://CRAN.R-project.org/package=survival>). A Cox regression from the  
594 same package was used to account for the following covariates: age, sex, primary or metastatic  
595 status and genomic subtype (BRAF mutant, RAS mutant, NF1 mutant or triple wild-type).

596

### 597 **EPIC and CIBERSORTx analyses**

598 Cell type fractions for bulk RNA-seq melanoma samples from TCGA SKCM were computed  
599 with EPIC v1.1.5 (<http://epic.gfellerlab.org>) using default parameters and CIBERSORTx  
600 (<https://cibersortx.stanford.edu/>) using LM22 signature matrix and “B-mode” batch correction.  
601 Differences between melanomas enriched and not enriched for the *AR* silencing gene signature  
602 were tested with Wilcoxon rank-sum tests.

603

### 604 **iLNCS analysis**

605 The analysis of concordance between our in-house *AR* silencing gene signature and iLNCS  
606 chemical perturbation signatures was performed by interrogating the iLNCS data portal  
607 (<http://www.ilincs.org/ilincs/>). Briefly, the iLNCS web application computes concordance as  
608 the Pearson correlation coefficient between the fold changes of the genes in common (n=21)  
609 between the query signature and the pre-computed iLNCS signatures. Signatures with



610 correlation  $> |0.2|$  and p-value  $< 0.05$  are extracted and sorted by concordance. A list of top  
611 iLINCS signatures with concordance score  $>0.65$  is shown in Supplementary Table S5.

612

### 613 **Tumorigenesis experiments**

614 Intradermal back injections of indicated melanoma cells were carried out in 6 to 8-week-old  
615 male and female NOD SCID mice (NOD.CB17-Prkdcscid/J, Jackson Laboratory). In brief,  $1$   
616  $\times 10^6$  melanoma cells (WM1366, A375, SKMEL28) infected with *AR* silencing vs control  
617 lentiviruses were injected with Matrigel (Corning) ( $70 \mu\text{l}$  per injection) intradermally in parallel  
618 into the left and right side of mice with 29-gauge syringes. Mice were sacrificed and Matrigel  
619 nodules were retrieved for tissue analysis 16 days after injection.

620 For *in vivo* AZD3514 treatment experiments, RFP-expressing A375 melanoma cells ( $1 \times 10^6$ )  
621 were intradermally injected with Matrigel solution in the back skin of 10 male NOD SCID  
622 mice. Three days post-injection mice were either treated with  $100 \mu\text{l}$  of AZD3514 ( $50 \text{ mg/kg}$ ,  
623 per mouse, group of 5 mice) or with Captisol (Ligand Technology) as vehicle control (a group  
624 of 4 mice) for consecutive 12 days by oral gavage. The bodyweight of the mice was measured  
625 regularly during the treatment. Mice were sacrificed and Matrigel nodules were retrieved for  
626 tissue analysis at the end of the treatment.

627 Alternatively, melanoma cells were either treated with AZD3514 ( $10 \mu\text{M}$ ) or DMSO for 12 hrs  
628 in culture and injected intradermally in mice together with Matrigel as described above. The  
629 tumors were allowed to grow for two weeks and nodules were retrieved for tissue analysis at  
630 the end of the treatment.

631 Intradermal back injections of YUMM1.7-RFP cells were carried out in 6 to 8-week-old male  
632 and female mice (C57BL/6J, Jackson Laboratory). In brief,  $5 \times 10^5$  melanoma cells infected  
633 with *AR* silencing vs control lentiviruses were injected with Matrigel (Corning) ( $60 \mu\text{l}$  per  
634 injection) intradermally in parallel into the left and right side of mice with 29-gauge syringes.

635 Mice were sacrificed and Matrigel nodules were retrieved for flow cytometry analysis 14 days  
636 after injection. All mice were housed in the animal facility of the University of Lausanne.

637

### 638 **Tumor digestion, cell isolation and flow cytometric analysis**

639 Tumors were minced in RPMI with 2% FBS, intravenous collagenase (0.5 mg/ml, Sigma-  
640 Aldrich) and DNase (1 µg/ml, Sigma-Aldrich) and digested at 37°C for 45 min. The digested  
641 samples were then filtered through a 70 µm cell strainer and washed with fluorescent activated  
642 cell sorter buffer (phosphate buffered saline with 2% fetal bovine serum and 2 mM EDTA).  
643 The cell pellets were then incubated with ACK lysis buffer (Invitrogen) to lyse red blood cells.  
644 Next, viable cells in single-cell tumor suspensions were further enriched by density gradient  
645 centrifugation (800g, 30 min) at room temperature with 48% and 80% percoll (GE healthcare)  
646 and collected from the interphase of the gradient. Fluorescent activated cell sorter analysis was  
647 performed using LSRII (BD Biosciences). Data were analyzed using FlowJo. The following  
648 antibodies were used for flow cytometry: anti-CD3 (17A2), anti-CD4 (RM4-5), anti-CD8α  
649 (53-6.7), anti-CD11b (M1/70), anti-CD45 (104), anti-Gr-1 (RB6-8C5), anti-FoxP3 (FJK-16s),  
650 anti-CD44 (IM7), anti-F4/80 (BM8), anti-LAG3 (C9B7W), anti-PD1 (RMP1-30) and anti-  
651 Arg1 (A1exF5). Cell populations were identified based on the expression markers listed here.  
652 CD4 T cells: CD45<sup>+</sup>/CD3<sup>+</sup>/CD4<sup>+</sup>; CD8 T cells: CD45<sup>+</sup>/CD3<sup>+</sup>/CD8<sup>+</sup>; TregS:  
653 CD45<sup>+</sup>/CD3<sup>+</sup>/CD4<sup>+</sup>/FoxP3<sup>+</sup>; Macrophage: CD45<sup>+</sup>/Gr-1<sup>-</sup>/F4/80<sup>+</sup>/CD11b<sup>+</sup>. Antibodies  
654 details - including commercial sources - are provided in Supplementary Table 6.

655

### 656 **Statistical analysis**

657 Statistical testing was performed using Prism 7 (GraphPad Software). Data are presented as  
658 mean± SEM or mean ± SD, as indicated in the legends. Statistical significance for comparing  
659 two experimental conditions was calculated by two-tailed t-tests. For multiple comparisons of

660 more than two conditions, one-way ANOVA was employed, with Dunnett's test to compare  
661 different test conditions to the same control. For tumorigenicity assays, wherever possible,  
662 individual animal variability issue was minimized by contralateral injections in the same  
663 animals of control versus experimental combinations of cells. No statistical method was used  
664 to predetermine sample size in animal experiments and no exclusion criteria were adopted for  
665 studies and sample collection.

666

### 667 **Study approvals**

668 Melanocytes were prepared from discarded human skin samples from abdominoplasty or  
669 circumcision at the Department of Plastic Reconstructive Surgery or Pediatrics, Lausanne  
670 University, with required institutional approvals (UNIL: CER-VD 222/12) and informed  
671 consent. Benign nevi, dysplastic nevi, primary and metastatic skin sections, and melanoma  
672 tissue microarray slides were obtained from the Live Cell Biobanks of the University Research  
673 Priority Program (URPP) "Translational Cancer Research" (Mitchell P. Levesque, University  
674 Hospital Zurich). All samples were obtained as surplus material from consenting patients  
675 (Ek.647/800), and the experiments were approved by the Kantonal ethical committee of Zürich  
676 (Kantonale Ethikkommission Zürich, Zürich, Switzerland, approval no. KEK.Zh.Nr.2014-  
677 0425). No access to sensitive information has been provided.

678 All animal studies were carried out according to Swiss guidelines for the use of laboratory  
679 animals, with protocols approved by the University of Lausanne animal care and use committee  
680 and the veterinary office of Canton Vaud (animal license No. 1854.4f/ 1854.5a).

681

### 682 **Author contributions**

683 MM, SG, AC, GB, AK, LM, JE, AS performed the experiments and/or contributed to analysis  
684 of the results. DT and GC performed the bioinformatics analysis. YRY and PCH performed

685 the FACS analysis. ML and RD provided clinical samples. BO helped with the writing of the  
686 manuscript. MM, SG and GPD designed the study, assessed the data and wrote the manuscript.  
687 MM and SG share co-first authorship based on their contribution to the work.

688

## 689 **Acknowledgments**

690 We thank Meenhard Herlyn for the gift of WM1366, WM983A, WM1862, WM1552C cells;  
691 Pascal Schneider for the gift of STING antibody; Fabio Martinon for stimulating discussions;  
692 Xiaoyun Li, Haiping Wang, Beatrice Tassone and Tatiana Proust for technical help. This study  
693 was supported by grants from the Swiss National Science Foundation (310030B\_176404  
694 “Genomic instability and evolution in cancer stromal cells”), the Swiss Cancer League (KFS  
695 4709-02-2019), the European Research Council (26075083), and the NIH (R01AR039190,  
696 R01AR064786; the content does not necessarily represent the official views of the NIH). We  
697 thank the University Research Priority Program (URPP) in Translational Cancer Research  
698 Biobank at the University of Zürich for access to the melanoma cell lines.

699

## 700 **Declaration of Interests**

701 The authors have declared that no conflict of interest exists.

702

703

## 704 References

705

- 706 1. Nosrati A, and Wei ML. Sex disparities in melanoma outcomes: the role of biology.  
707 *Arch Biochem Biophys*. 2014;563:42-50.
- 708 2. Gamba CS, Clarke CA, Keegan THM, Tao L, and Swetter SM. Melanoma Survival  
709 Disadvantage in Young, Non-Hispanic White Males Compared With Females. *Jama*  
710 *Dermatol*. 2013;149(8):912-20.
- 711 3. Joosse A, Collette S, Suciú S, Nijsten T, Patel PM, Keilholz U, et al. Sex is an  
712 independent prognostic indicator for survival and relapse/progression-free survival in  
713 metastasized stage III to IV melanoma: a pooled analysis of five European organisation  
714 for research and treatment of cancer randomized controlled trials. *Journal of clinical*  
715 *oncology : official journal of the American Society of Clinical Oncology*.  
716 2013;31(18):2337-46.
- 717 4. Clocchiatti A, Cora E, Zhang Y, and Dotto GP. Sexual dimorphism in cancer. *Nat Rev*  
718 *Cancer*. 2016;16(5):330-9.
- 719 5. Natale CA, Duperret EK, Zhang J, Sadeghi R, Dahal A, O'Brien KT, et al. Sex steroids  
720 regulate skin pigmentation through nonclassical membrane-bound receptors. *Elife*.  
721 2016;5.
- 722 6. Natale CA, Li J, Zhang J, Dahal A, Dentchev T, Stanger BZ, et al. Activation of G  
723 protein-coupled estrogen receptor signaling inhibits melanoma and improves response  
724 to immune checkpoint blockade. *Elife*. 2018;7.
- 725 7. Ramelyte E, Koelblinger P, and Dummer R. Oestrogen receptor expression in  
726 melanoma. *J Eur Acad Dermatol Venereol*. 2017;31(9):1399-400.
- 727 8. Chang C, Lee SO, Yeh S, and Chang TM. Androgen receptor (AR) differential roles in  
728 hormone-related tumors including prostate, bladder, kidney, lung, breast and liver.  
729 *Oncogene*. 2014;33(25):3225-34.
- 730 9. Rampen FH, and Mulder JH. Malignant melanoma: an androgen-dependent tumour?  
731 *Lancet*. 1980;1(8168 Pt 1):562-4.
- 732 10. Morvillo V, Luthy IA, Bravo AI, Capurro MI, Donaldson M, Quintans C, et al. Atypical  
733 androgen receptor in the human melanoma cell line IIB-MEL-J. *Pigment Cell Res*.  
734 1995;8(3):135-41.
- 735 11. Morvillo V, Luthy IA, Bravo AI, Capurro MI, Portela P, Calandra RS, et al. Androgen  
736 receptors in human melanoma cell lines IIB-MEL-LES and IIB-MEL-IAN and in  
737 human melanoma metastases. *Melanoma Res*. 2002;12(6):529-38.
- 738 12. Hsueh EC, Gupta RK, Lefor A, Reyzin G, Ye W, and Morton DL. Androgen blockade  
739 enhances response to melanoma vaccine. *J Surg Res*. 2003;110(2):393-8.
- 740 13. Wang Y, Ou Z, Sun Y, Yeh S, Wang X, Long J, et al. Androgen receptor promotes  
741 melanoma metastasis via altering the miRNA-539-3p/USP13/MITF/AXL signals.  
742 *Oncogene*. 2017;36(12):1644-54.
- 743 14. Tirosh I, Izar B, Prakadan SM, Wadsworth MH, 2nd, Treacy D, Trombetta JJ, et al.  
744 Dissecting the multicellular ecosystem of metastatic melanoma by single-cell RNA-  
745 seq. *Science*. 2016;352(6282):189-96.
- 746 15. Ho SM, Hartley BJ, Flaherty E, Rajarajan P, Abdelaal R, Obiorah I, et al. Evaluating  
747 Synthetic Activation and Repression of Neuropsychiatric-Related Genes in hiPSC-  
748 Derived NPCs, Neurons, and Astrocytes. *Stem Cell Reports*. 2017;9(2):615-28.

- 749 16. Kearns NA, Genga RM, Enuameh MS, Garber M, Wolfe SA, and Maehr R. Cas9  
750 effector-mediated regulation of transcription and differentiation in human pluripotent  
751 stem cells. *Development*. 2014;141(1):219-23.
- 752 17. Crawford ED, Schellhammer PF, McLeod DG, Moul JW, Higano CS, Shore N, et al.  
753 Androgen Receptor Targeted Treatments of Prostate Cancer: 35 Years of Progress with  
754 Antiandrogens. *J Urol*. 2018;200(5):956-66.
- 755 18. Loddick SA, Ross SJ, Thomason AG, Robinson DM, Walker GE, Dunkley TP, et al.  
756 AZD3514: a small molecule that modulates androgen receptor signaling and function  
757 in vitro and in vivo. *Molecular cancer therapeutics*. 2013;12(9):1715-27.
- 758 19. Bambury RM, and Scher HI. Enzalutamide: Development from bench to bedside.  
759 *Urologic oncology*. 2015;33(6):280-8.
- 760 20. Clocchiatti A, Ghosh S, Procopio MG, Mazzeo L, Bordignon P, Ostano P, et al.  
761 Androgen receptor functions as transcriptional repressor of cancer-associated fibroblast  
762 activation. *J Clin Invest*. 2018;128(12):5531-48.
- 763 21. Matsumoto T, Sakari M, Okada M, Yokoyama A, Takahashi S, Kouzmenko A, et al.  
764 The androgen receptor in health and disease. *Annual review of physiology*.  
765 2013;75:201-24.
- 766 22. Hendrix J, van Heertum B, Vanstreels E, Daelemans D, and De Rijck J. Dynamics of  
767 the ternary complex formed by c-Myc interactor JPO2, transcriptional co-activator  
768 LEDGF/p75, and chromatin. *J Biol Chem*. 2014;289(18):12494-506.
- 769 23. Tian Y, Huang C, Zhang H, Ni Q, Han S, Wang D, et al. CDCA7L promotes  
770 hepatocellular carcinoma progression by regulating the cell cycle. *Int J Oncol*.  
771 2013;43(6):2082-90.
- 772 24. Bergink S, and Jentsch S. Principles of ubiquitin and SUMO modifications in DNA  
773 repair. *Nature*. 2009;458(7237):461-7.
- 774 25. Kunz K, Piller T, and Muller S. SUMO-specific proteases and isopeptidases of the  
775 SENP family at a glance. *J Cell Sci*. 2018;131(6).
- 776 26. Adutler-Lieber S, Friedman N, and Geiger B. Expansion and Antitumor Cytotoxicity  
777 of T-Cells Are Augmented by Substrate-Bound CCL21 and Intercellular Adhesion  
778 Molecule 1. *Front Immunol*. 2018;9:1303.
- 779 27. Rakoff-Nahoum S, and Medzhitov R. Toll-like receptors and cancer. *Nat Rev Cancer*.  
780 2009;9(1):57-63.
- 781 28. Brisse M, and Ly H. Comparative Structure and Function Analysis of the RIG-I-Like  
782 Receptors: RIG-I and MDA5. *Front Immunol*. 2019;10:1586.
- 783 29. Xu R. Semaphorin 3A: A new player in bone remodeling. *Cell Adh Migr*. 2014;8(1):5-  
784 10.
- 785 30. Reuten R, Patel TR, McDougall M, Rama N, Nikodemus D, Gibert B, et al. Structural  
786 decoding of netrin-4 reveals a regulatory function towards mature basement  
787 membranes. *Nat Commun*. 2016;7:13515.
- 788 31. Roider EM, and Fisher DE. The impact of MITF on melanoma development: news from  
789 bench and bedside. *J Invest Dermatol*. 2014;134(1):16-7.
- 790 32. Denecker G, Vandamme N, Akay O, Koludrovic D, Taminau J, Lemeire K, et al.  
791 Identification of a ZEB2-MITF-ZEB1 transcriptional network that controls  
792 melanogenesis and melanoma progression. *Cell Death Differ*. 2014;21(8):1250-61.
- 793 33. Revach OY, Sandler O, Samuels Y, and Geiger B. Cross-Talk between Receptor  
794 Tyrosine Kinases AXL and ERBB3 Regulates Invadopodia Formation in Melanoma  
795 Cells. *Cancer Res*. 2019;79(10):2634-48.
- 796 34. Subramanian A, Tamayo P, Mootha VK, Mukherjee S, Ebert BL, Gillette MA, et al.  
797 Gene set enrichment analysis: a knowledge-based approach for interpreting genome-  
798 wide expression profiles. *Proc Natl Acad Sci U S A*. 2005;102(43):15545-50.

- 799 35. Racle J, de Jonge K, Baumgaertner P, Speiser DE, and Gfeller D. Simultaneous  
800 enumeration of cancer and immune cell types from bulk tumor gene expression data.  
801 *Elife*. 2017;6.
- 802 36. Newman AM, Steen CB, Liu CL, Gentles AJ, Chaudhuri AA, Scherer F, et al.  
803 Determining cell type abundance and expression from bulk tissues with digital  
804 cytometry. *Nat Biotechnol*. 2019;37(7):773-82.
- 805 37. Chen Q, Sun L, and Chen ZJ. Regulation and function of the cGAS-STING pathway  
806 of cytosolic DNA sensing. *Nat Immunol*. 2016;17(10):1142-9.
- 807 38. Dou Z, Ghosh K, Vizioli MG, Zhu J, Sen P, Wangenstein KJ, et al. Cytoplasmic  
808 chromatin triggers inflammation in senescence and cancer. *Nature*.  
809 2017;550(7676):402-6.
- 810 39. Bonner WM, Redon CE, Dickey JS, Nakamura AJ, Sedelnikova OA, Solier S, et al.  
811 GammaH2AX and cancer. *Nat Rev Cancer*. 2008;8(12):957-67.
- 812 40. Wu TD, Madireddi S, de Almeida PE, Banchemereau R, Chen YJ, Chitre AS, et al.  
813 Peripheral T cell expansion predicts tumour infiltration and clinical response. *Nature*.  
814 2020;579(7798):274-8.
- 815 41. Meeth K, Wang JX, Micevic G, Damsky W, and Bosenberg MW. The YUMM lines: a  
816 series of congenic mouse melanoma cell lines with defined genetic alterations. *Pigment  
817 Cell Melanoma Res*. 2016;29(5):590-7.
- 818 42. Yang ZZ, Kim HJ, Villasboas JC, Chen YP, Price-Troska T, Jalali S, et al. Expression  
819 of LAG-3 defines exhaustion of intratumoral PD-1(+) T cells and correlates with poor  
820 outcome in follicular lymphoma. *Oncotarget*. 2017;8(37):61425-39.
- 821 43. Karanika S, Karantanos T, Li L, Wang J, Park S, Yang G, et al. Targeting DNA Damage  
822 Response in Prostate Cancer by Inhibiting Androgen Receptor-CDC6-ATR-Chk1  
823 Signaling. *Cell Rep*. 2017;18(8):1970-81.
- 824 44. Li L, Karanika S, Yang G, Wang J, Park S, Broom BM, et al. Androgen receptor  
825 inhibitor-induced "BRCAness" and PARP inhibition are synthetically lethal for  
826 castration-resistant prostate cancer. *Sci Signal*. 2017;10(480).
- 827 45. Chatterjee P, Schweizer MT, Lucas JM, Coleman I, Nyquist MD, Frank SB, et al.  
828 Supraphysiological androgens suppress prostate cancer growth through androgen  
829 receptor-mediated DNA damage. *J Clin Invest*. 2019;130:4245-60.
- 830 46. Lin C, Yang L, Tanasa B, Hutt K, Ju BG, Ohgi K, et al. Nuclear receptor-induced  
831 chromosomal proximity and DNA breaks underlie specific translocations in cancer.  
832 *Cell*. 2009;139(6):1069-83.
- 833 47. Chiba K, Lorbeer FK, Shain AH, McSwiggen DT, Schruf E, Oh A, et al. Mutations in  
834 the promoter of the telomerase gene TERT contribute to tumorigenesis by a two-step  
835 mechanism. *Science*. 2017;357(6358):1416-20.
- 836 48. Ryan CP, and Crespi BJ. Androgen receptor polyglutamine repeat number: models of  
837 selection and disease susceptibility. *Evol Appl*. 2013;6(2):180-96.
- 838 49. Consortium ITP-CAoWG. Pan-cancer analysis of whole genomes. *Nature*.  
839 2020;578(7793):82-93.
- 840 50. Yeap BB, Page ST, and Grossmann M. Testosterone treatment in older men: clinical  
841 implications and unresolved questions from the Testosterone Trials. *Lancet Diabetes  
842 Endocrinol*. 2018;6(8):659-72.
- 843 51. An X, Zhu Y, Zheng T, Wang G, Zhang M, Li J, et al. An Analysis of the Expression  
844 and Association with Immune Cell Infiltration of the cGAS/STING Pathway in Pan-  
845 Cancer. *Mol Ther Nucleic Acids*. 2019;14:80-9.
- 846 52. Woo SR, Corrales L, and Gajewski TF. The STING pathway and the T cell-inflamed  
847 tumor microenvironment. *Trends Immunol*. 2015;36(4):250-6.

- 848 53. Sharma P, and Allison JP. The future of immune checkpoint therapy. *Science*.  
849 2015;348(6230):56-61.
- 850 54. Chen DS, and Mellman I. Elements of cancer immunity and the cancer-immune set  
851 point. *Nature*. 2017;541(7637):321-30.
- 852 55. Ozdemir BC, and Dotto GP. Sex Hormones and Anticancer Immunity. *Clin Cancer*  
853 *Res*. 2019.
- 854 56. Dotto GP. Gender and sex-time to bridge the gap. *EMBO Mol Med*. 2019;11(5).
- 855 57. Bottoni G, Katarkar A, Tassone B, Ghosh S, Clocchiatti A, Goruppi S, et al. CSL  
856 controls telomere maintenance and genome stability in human dermal fibroblasts. *Nat*  
857 *Commun*. 2019;10(1):3884.
- 858 58. Li H, Wang Z, Xiao W, Yan L, Guan W, Hu Z, et al. Androgen-receptor splice variant-  
859 7-positive prostate cancer: a novel molecular subtype with markedly worse androgen-  
860 deprivation therapy outcomes in newly diagnosed patients. *Mod Pathol*.  
861 2018;31(1):198-208.  
862

## 863 **Figure legends**

### 864 **Figure 1. AR expression in melanoma cells.**

865 A) Left: Representative images of AR expression in cells of melanocytic lesions versus  
866 melanocytes in flanking normal skin (arrows) stained by double immunofluorescence with  
867 antibodies against AR (red) and MelanA (green) for melanocytes identification, with DAPI  
868 staining for nuclear localization (blue). Scale bar 30  $\mu$ m. Additional images of this and other  
869 lesions are shown in Supplementary Figure 1. Right: Quantification of nuclear AR fluorescence  
870 signal in individual MelanA-positive cells (dots) of benign nevi, dysplastic nevi and metastatic  
871 melanomas versus melanocytes of flanking skin (samples from male patients in this and  
872 following panels are indicated by asterisks). Arbitrary fluorescence intensity values (AU) per  
873 individual cells are indicated together with mean and statistical significance (unpaired t test,  
874 \*\*\*\*  $< 0.001$ ). B) Left: Immunohistochemical staining of a primary melanoma lesion with anti-  
875 MelanA antibodies and topographically distinct areas (boxes 1, 2 and 3) analyzed for single cell  
876 AR expression by double immunofluorescence of parallel sections with anti AR and MelanA  
877 antibodies. Scale bar 500  $\mu$ m. Immunofluorescence images of cells in this and other lesions are  
878 shown in Supplementary Figure 2. Right: Quantification of nuclear AR fluorescence signal in  
879 individual MelanA-positive cells (dots) from three topographically delimited areas per lesion



880 (numbered as in B) of benign nevi, dysplastic nevi, primary and metastatic melanomas from  
881 different patients. Arbitrary fluorescence intensity values (AU) per individual cells are  
882 indicated together with the mean. C) Quantification of AR fluorescence signal in MelanA-  
883 positive cells in a tissue microarray of different types of melanoma patients with different  
884 clinical histories (left) and of metastatic and non-metastatic form (right). SSM = Superficial  
885 Spreading Melanoma. Acral = acral lentiginous melanoma. Quantification was based on  
886 digitally-acquired images of three independent fields per clinical lesion (a minimum of 50 cells  
887 per field) on the arrays. Results are expressed as average values for each lesion (dots) together  
888 with mean per type of lesions and primary versus metastatic. Quantification of samples divided  
889 by sex and age of patients is provided in Supplementary Figure 3. Patient sample details  
890 together with clinical diagnosis, age and sex is provided in Supplementary Table 1. D)  
891 Immunohistochemical staining with anti-AR antibodies of melanomas with high versus  
892 intermediate and low AR expression as assessed by double immunofluorescence analysis in  
893 (B). Scale bar: 30  $\mu$ m. Lower magnification images with Melan A staining of parallel sections  
894 are shown in Supplementary Figure 4. E) Left: Quantification of nuclear AR expression by  
895 immunofluorescence analysis of the indicated melanoma cell lines or primary melanoma cells  
896 (red) versus primary melanocytes (black), and prostate cancer cell lines (green) examining >  
897 100 cells per sample. Values for individual cells are indicated as dots together with mean  $\pm$   
898 SD. Right: Representative images of melanoma cells (A375, M14) and primary melanocytes  
899 with high versus low AR expression. Scale bar: 10  $\mu$ m. Additional images of cells are shown  
900 in Supplementary Figure 5.

901

902 **Figure 2. AR down-modulation suppresses melanoma cell proliferation and self-renewal**  
903 **potential.**

904 A) Left: WM1366 melanoma cells stably infected with 2 AR-silencing lentiviruses versus  
905 empty vector control were analyzed by cell density assays (CellTiter-Glo) at the indicated days  
906 after infection and selection. Results are presented as luminescence intensity values relative to  
907 day 1. Data are shown as mean  $\pm$  SD, 1-way ANOVA with Dunnett's test.  $n = 3$  independent  
908 experiments. \* $P < 0.05$ . Right: results with additional melanoma cell lines and primary  
909 melanoma cells (MM141022, M131206, M121008) presented as heat maps. Efficiency of AR  
910 gene silencing is shown in Supplementary Figure 7. Corresponding individual plot results  
911 together with statistical significance are shown in Supplementary Figure 8A. B, C)  
912 Proliferation potential of the indicated melanoma cells plus/minus AR silencing was assessed,  
913 at day 6 after lentivirus infection, by clonogenicity (B) or sphere formation assays (C). For  
914 each condition, cells were tested in triplicate dishes, with all experiments repeated 3 times.  
915 Results for WM1366 melanoma cells are shown as individual cultured dishes together with  
916 mean of  $\pm$  SD, 1-way ANOVA with Dunnett's test.  $n = 3$  technical replicates (experiments).  
917 \* $P < 0.05$ ; \*\*\* $P < 0.005$ . Results for other melanoma cells are presented as heat map, with  
918 individual plots for each cell line and representative images being shown in Supplementary  
919 Figure 8B, C. D-F) Melanoma cells plus/minus AR silencing as in the previous panels were  
920 tested by EdU labelling assay (D), apoptosis by annexin V staining (E) or senescence  
921 associated  $\beta$ -Gal activity (F). Left: quantification of the percentage of positive cells in  
922 individual cultured dishes of WM1366 melanoma cells plus/minus shAR together with mean  
923 of  $\pm$  SD, 1-way ANOVA with Dunnett's test.  $n = 3$  independent experiments). \*\*  $P < 0.01$ ;  
924 \*\*\*\* $P < 0.001$ . Right: results with additional melanoma cell lines presented as heat maps with  
925 individual plots for each cell line shown in Supplementary Figure 9. G) Right: representative  
926 IF analysis of AR expression in A375 cells stably infected with an AR-over-expressing  
927 lentivirus or vector control and super-infected with an AR silencing lentivirus or corresponding  
928 control. Scale bar 10  $\mu\text{m}$ . Quantification of results, also in cells infected with a second AR

929 silencing lentivirus, together with mRNA expression measurements are shown in  
930 Supplementary Figure 10A and B. Left: clonogenicity and senescence associated  $\beta$ -Gal activity  
931 assays of A375 melanoma cells plus/minus AR silencing and overexpression as indicated. Data  
932 are shown as mean  $\pm$  SD, 1-way ANOVA with Dunnett's test.  $n = 3$  dishes, \*\*\*  $p < 0.005$ . Cell  
933 density, EdU labelling and apoptosis assays with A375 cells plus/minus concomitant AR  
934 overexpression and silencing are shown in Supplementary Figure 10C-E. H) Proliferation live-  
935 cell imaging assays (IncuCyte<sup>TM</sup> system, Essen Instruments) of the indicated primary  
936 melanocyte strains (c, f) and melanoma cells (M14) stably infected with an AR over-expressing  
937 lentivirus versus empty vector control. Cells were plated in triplicate wells in 96-well plates  
938 followed by cell density measurements (4 images per well every 4 hours for 128 hours).  $n$   
939 (number of wells) = 3, Pearson  $r$  correlation test. \* $P < 0.05$ ; \*\*  $P < 0.01$ . I) Representative  
940 images and quantification of AR expression by IF analysis of dCas9-KRAB-expressing A375  
941 cells infected with lentiviruses expressing two single guide RNAs targeting the AR promoter  
942 region (sgAR1, sgAR2) versus scrambled single guide RNA control (sgCTR) for 3 day. Scale  
943 bar 10  $\mu\text{m}$ . Violin plot showed the nuclear AR fluorescence intensity, together with mean  $\pm$   
944 SD,  $n > 300$  cells per sample, 1-way ANOVA with Dunnett's test. \*\*\*  $p < 0.005$ . J) Parallel  
945 cultures of cells as in the previous panel were tested by clonogenicity assays on triplicate  
946 dishes, starting at day 3 after single guide RNA expression.  $n = 3$  biological replicates (dishes),  
947 1-way ANOVA with Dunnett's test. \*\*\*  $p < 0.005$ .

948

949 **Figure 3. Modulation of melanoma cells proliferation by pharmacological inhibition and**  
950 **agonist stimulation.**

951 A) Proliferation live-cell imaging assays of the indicated melanoma cell lines treated with the  
952 AR inhibitors AZD3514 (2, 5, 10  $\mu\text{M}$ ) or Enzalutamide (5, 10  $\mu\text{M}$ ) versus DMSO control. Cells  
953 were plated on triplicate wells in 96-well dishes followed by cell imaging measurements

954 (IncuCyte™ system, Essen Instruments), capturing 4 images per well every 4 hours for 140  
955 hours). n (number of wells) = 3, Pearson r correlation test. \*P < 0.05; \*\* P < 0.01; \*\*\*P <  
956 0.005. B) Left: WM1366 melanoma cells treated with AZD3514 versus DMSO control were  
957 analyzed by cell density assays (CellTiter-Glo) at the indicated days. Results are presented as  
958 luminescence intensity values relative to day 1. Data are shown as mean ± SD, 1-way ANOVA  
959 with Dunnett's test. n = 3 independent experiments. \*P < 0.05. Right: results with additional  
960 melanoma cell lines and primary melanoma cells (MM141022, M131206) presented as heat  
961 maps, with individual plots per cell line being shown in Supplementary Figure 11B. C) The  
962 indicated melanoma cells in triplicate dishes were treated with AZD3514 (5 μM and 10 μM)  
963 versus vehicle control (DMSO) followed by crystal violet staining 7 days later and ImageJ  
964 determination of % of cell coverage area. Data are shown as mean ± SD, 1-way ANOVA with  
965 Dunnett's test. n = 3 biological replicates (dishes). \*\*\*\*P < 0.001. D) *In vitro* cancer / stromal  
966 cell expansion assays, based on the co-culture of RFP-expressing A375 melanoma cells  
967 together with GFP-expressing human dermal fibroblasts (HDF) in Matrigel in triplicate dishes,  
968 plus treatment with AZD3514 (10 μM) or DMSO control for 4 days. Shown are representative  
969 images and quantification of melanoma cells expansion (percentage area covered by melanoma  
970 cells per field). Each dot represents one analyzed field. n (number of fields) = 12, two-tailed  
971 paired t test, \*\*\*\*P < 0.001. Scale bar: 30 μm. E) Proliferation live-cell imaging assays of two  
972 primary melanocyte strains cultured in medium with charcoal-stripped serum and treated with  
973 dihydrotestosterone (DHT) at the indicated concentrations versus DMSO control. Cells were  
974 plated in triplicate wells in 96-well plates and imaged using IncuCyte™ system (Essen  
975 Instruments), every 4 hours for 145 hours. n (number of wells) = 3, Pearson r correlation test.  
976 \*P < 0.05; \*\* P < 0.01. Results of a similar assay with another primary melanocyte strain and  
977 melanoma cells are shown in Supplementary Figure 12A. F) Left: cell density assays  
978 (CellTiter-Glo) of WM1366 melanoma cells cultured in medium with charcoal-treated serum

979 and treated with DHT (20 nM) versus DMSO control for the indicated days. Results are  
980 presented as luminescence intensity values relative to day 1. Data are shown as mean  $\pm$  SD, 1-  
981 way ANOVA with Dunnett's test.  $n = 3$  independent experiments.  $*P < 0.05$ . Right: results of  
982 a similar assay with additional melanoma cell lines and primary melanoma cells (MM141022,  
983 M131206) presented as heat maps, with individual plots and statistical significance shown in  
984 Supplementary Figure 12B.

985

986 **Figure 4. Global analysis of AR-regulated genes in melanoma cells and clinical relevance.**

987 A) Volcano plot showing the shared transcriptional changes elicited by AR silencing in  
988 WM1366, SKMEL28 and WM115 melanoma cells plus/minus AR-silencing by two different  
989 lentiviruses versus empty vector control. Cells were analyzed 5 days after infection by  
990 Clariom<sup>TM</sup> D array hybridization. The x-axis shows the log<sub>2</sub> fold-change between the two  
991 conditions, the y-axis shows the  $-\log_{10}$  (p-value). A False Discovery Rate (FDR) threshold of  
992 0.05 and fold change thresholds of -1 and 1 are indicated by dashed red lines. Each dot  
993 represents one gene. Grey and red dots correspond to genes not significantly or non-  
994 concordantly modulated in the three melanoma lines, respectively. Black dots show genes  
995 above thresholds that are concordantly up- or down- regulated in all three cell lines and  
996 compose the AR silencing gene signature utilized for further analysis. A few selected genes  
997 among the most significantly differentially expressed ones are indicated. The list of 155 genes  
998 associated with AR silencing gene signature is provided in Supplementary Table 3. B)  
999 Expression of the indicated genes in multiple melanoma cell lines plus/minus AR silencing by  
1000 two different lentiviruses versus empty vector control. RT-qPCR results after RPLP0  
1001 normalization are shown as a heat map of ratios of gene expression (folds of down- or up-  
1002 regulation in green and red, respectively). Individual gene expression profiles (with most  
1003 analyses based on two independent experiments) are shown in Supplementary Fig. S13. C)

1004 Gene set enrichment analysis (GSEA) of the common gene expression profiles elicited by AR  
1005 gene silencing in WM1366, SKMEL28 and WM115 melanoma cells (Supplementary Table 3)  
1006 versus a predefined set of gene signatures related to various processes and signaling pathways  
1007 (Broad Institute, <http://software.broadinstitute.org/gsea/msigdb/collections.jsp#H>). Top:  
1008 GSEA plot distribution of gene signatures related to interferon alpha, inflammatory response  
1009 and DNA repair pathways. Genes are ranked by signal-to-noise ratio based on their differential  
1010 expression in AR-silenced versus control melanoma cells; position of genes in the respective  
1011 hallmark gene sets is indicated by black vertical bars, and the enrichment score is shown in  
1012 green. Bottom: relevant gene sets most significantly associated with AR silencing gene  
1013 signature are indicated together with the corresponding FDR-q values. The full list of  
1014 significantly associated gene signatures is provided in Supplementary Table 4. D) Association  
1015 of the AR silencing gene signature in melanoma cells - as obtained in panel A - with patients'  
1016 survival in TCGA Skin Cutaneous Melanoma (SKCM) dataset. Signature scores for each  
1017 patient were computed from RNA-seq data with GSVA R package (40), with Kaplan-Meier  
1018 curves showing that melanomas with positive scores for the AR silencing signature (red, N =  
1019 251) are significantly associated with better survival than the ones with negative scores, (blue,  
1020 N = 218), p-value = 2.6e-05, log-rank test. E) Fraction of tumor-infiltrating immune cells  
1021 estimated by EPIC R package analysis of TCGA Skin Cutaneous Melanoma (SKCM) dataset,  
1022 using default reference profile in tumors positive and negative for the AR silencing signature  
1023 (red and blue boxplots respectively). Cell fractions for B cells, CD4+ T cells, CD8+ T cells  
1024 and macrophages are reported (each dot representing one tumor). Outliers with cell fraction  
1025 greater than 0.15 are not shown. EPIC association plots for all other cell types are shown in  
1026 Supplementary Figure 14A together with the enrichment scores of signature matrix associated  
1027 with 22 different immune cell types determined by CIBERSORTx (Supplementary Figure  
1028 14B). F) Bar plot reporting the concordance between the melanoma AR silencing gene

1029 signature and iLINCS expression profiles of A375 cells treated with compounds targeting AR  
1030 (green), apoptosis-related proteins (BIRC2, BIRC3, XIAP, blue) and topoisomerases (TOP1,  
1031 TOP2A, red). Perturbagens of each class are sorted by concordance ( $p < 0.0001$ ) and the names  
1032 of the chemical compounds are reported on the x axis along with their molecular targets. If  
1033 multiple signatures were available for the same perturbagen (e.g. by varying concentration or  
1034 time), only the signature with the highest concordance was shown. A list of compounds  
1035 eliciting gene expression profiles with concordance coefficient  $> 0.6$  with AR silencing  
1036 signature is reported in Supplementary Table 5.

1037

1038 **Figure 5. Loss of AR function induces DNA breakage, cytoplasmic dsDNA leakage and**  
1039 **STING activation.**

1040 A) Comet assays of multiple melanoma cell lines plus/minus shRNA-mediated AR silencing  
1041 (5 days after infection). Shown are representative images of WM1366 melanoma cells together  
1042 with quantification of % tail DNA (calculated by Comet Score 1.6.1.13 software,  
1043 [www.rexhooover.com](http://www.rexhooover.com)) in five different melanoma cell lines. Scale bar: 10  $\mu\text{m}$ . n (number of  
1044 cells) =125; one-way ANOVA; \*\*\*\* $p < 0.001$ . B, C) Double immunofluorescence image  
1045 analysis of a panel of melanoma cell lines plus/minus shRNA-mediated AR silencing (5 days  
1046 after infection). B) representative images of WM1366 stained with antibodies against  $\gamma$ -H2AX  
1047 (green) and Phalloidin (gray) for cell border identification (upper panel), and dsDNA (red) and  
1048 STING (green) (middle panel) and ICAM1 (red) (lower panels). Scale bar: 10  $\mu\text{m}$ . C)  
1049 quantification of nuclear  $\gamma$ -H2AX, cytoplasmic DNA, ICAM1 immunofluorescence signal  
1050 intensity and percentage of STING positive cells in the indicated panel of melanoma cell lines  
1051 plus/minus AR silencing.  $> 100$  cells were counted in each condition. Results are expressed as  
1052 mean  $\pm$  SD. n (number of experiments) = 3; 1-way ANOVA with Dunnett's test, \*\*  $P < 0.01$ ,  
1053 \*\*\*  $P < 0.005$ . D, E) Double immunofluorescence image analysis of a panel of melanoma cells

1054 treated with AZD3514 (10  $\mu$ M) versus DMSO control for 2 days. Shown are representative  
1055 images (D) and quantification (E) of the results as in the previous panel. n (number of  
1056 experiments) = 3; two-tailed paired t-test, \*P < 0.05; \*\* P < 0.01, \*\*\* P < 0.005.

1057

1058 **Figure 6. Loss of AR function induces STING-dependent gene expression.**

1059 A, B) Counteracting impact of AR and STING gene silencing on IL6 and ICAM1 expression.

1060 Double immunofluorescence analysis of WM1366 melanoma cells transfected with STING  
1061 and/or AR silencing siRNAs versus scrambled controls, with antibodies against STING (upper  
1062 panel, green), IL6 and ICAM1 (middle and lower panels, red) with phalloidin staining for cell

1063 border delimitation (gray). Shown are representative images (A) and quantification (B) of  
1064 STING, IL6 and ICAM1 fluorescence signal intensity per cell, 48 h after transfection. Each

1065 dot corresponds to mean fluorescence intensity per cell. n (number of cells) = 25; paired t-test,

1066 \*\*\*P < 0.005, \*\*\*\*P < 0.001. Scale bar: 10  $\mu$ m. C) RT-qPCR analysis of STING, IL6 and

1067 ICAM1 mRNA expression in the indicated melanoma cell lines 48 h after transfection with  
1068 STING and/or AR silencing siRNAs versus scrambled controls. Each bar corresponds to mean

1069 expression levels per melanoma cell line. Data are represented as mean  $\pm$  SD. n (number of  
1070 strains) = 3; 1-way ANOVA with Dunnett's test, \*P < 0.05, \*\*P < 0.01. D) Representative

1071 double IF images and quantification of  $\gamma$ -H2AX expression (green) and cytoplasmic dsDNA

1072 (red) leakage in A375 cells stably infected with an AR-overexpressing (AR oe) or control  
1073 lentivirus and super-infected with two AR silencing lentiviruses versus control. Scale bar: 10

1074  $\mu$ m. Data are from triplicate experiments; each dot represents one experiment. n (number of  
1075 experiments) = 3; 1-way ANOVA with Dunnett's test, \*\* P < 0.01. E) representative double

1076 IF images and quantification of STING (green) and ICAM1 (red) expression in A375 cells  
1077 plus/minus AR overexpression and silencing as in the previous panel. n (independent

1078 experiments) = 3; 1-way ANOVA with Dunnett's test, \*\* P < 0.01.



1079

1080 **Figure 7. Suppression of melanoma formation by AR silencing.**

1081 WM1366 melanoma cells infected with an AR-silencing lentivirus versus vector control were  
1082 tested by parallel intradermal Matrigel injections into NOD/SCID male and female mice (5 per  
1083 group, data of male mice in red). Mice were sacrificed 16 days after injection. A) Tumor size,  
1084 measured by digital caliper (mass = (length x width x height) \*  $\pi/6$ ) together with representative  
1085 low magnification H/E images of the retrieved lesions. B-E) Double immunofluorescence  
1086 analysis of lesions with antibodies against AXL, for melanoma cells identification, and  
1087 quantification of KI67 (B) or cytoplasmic dsDNA (C) positive cells, and mean fluorescence  
1088 signal intensity of STING (D) and ICAM1 expression (E). Shown are representative images of  
1089 AXL positive cells (AXL signal not shown) stained with antibodies against the other markers,  
1090 together with relative quantification, (> 50 cells in 3-5 fields on digitally-retrieved images were  
1091 counted using ImageJ software). F) double immunofluorescence analysis of lesions with  
1092 antibodies against AXL and F4/80, for melanoma cells and macrophages identification,  
1093 respectively. Shown are representative images together with quantification of the number of  
1094 F4/80 positive cells per AXL positive tumor area, counting in each case 3-4 fields. Similar  
1095 determination of CD45 positive cells is shown in Supplementary Figure 15. n (control versus  
1096 experimental lesions) = 10; two-tailed paired t test, \*P < 0.05; \*\* P < 0.01; \*\*\*P < 0.005. Scale  
1097 bar: 10  $\mu$ m. Similar tumorigenicity experiments with A375 and SKMEL28 cells plus/minus  
1098 shRNA-mediated AR silencing are shown in Supplementary Figure 16, 17.

1099

1100 **Figure 8. Suppression of melanoma formation by AR inhibition.**

1101 RFP-expressing A375 melanoma cells were injected intradermally into 10 male mice. 3 days  
1102 post-injection, mice were treated by oral gavage with either AZD3514 (50 mg/kg) or DMSO  
1103 vehicle alone for 12 consecutive days. Immunofluorescence analysis was used to assess KI67

1104 (A) and cytoplasmic dsDNA (B) positivity and STING (C) and ICAM1 (D) expression levels  
1105 in melanoma cells (RFP-positive) together with numbers of juxtaposed leukocytes (E) and  
1106 macrophages (F), as assessed by staining for the CD45 and F4/80 markers, respectively. Shown  
1107 are quantifications together with representative images, including one (F) showing engulfment  
1108 of fragmented RFP-positive melanoma cells into F4/80 positive macrophages in lesions of mice  
1109 treated with the AZD3514 inhibitor. n (4 control versus 6 experimental lesions) = 10; unpaired  
1110 t-test, \*\* P < 0.01; \*\*\*P < 0.005, \*\*\*\*P < 0.001. Scale bar: 10  $\mu$ m (A-F). Similar  
1111 tumorigenicity experiments with injection of AZD3514 pretreated WM1366 cells are shown  
1112 in Supplementary Figure 18.

1113

1114 **Figure 9. Suppression of mouse melanoma formation and immune cells recruitment by**  
1115 **AR gene silencing.**

1116 RFP-expressing YUMM1.7 mouse melanoma cells infected with an AR-silencing lentivirus  
1117 versus vector control were tested by parallel intradermal Matrigel injections into BL6 male and  
1118 female mice (4 per group, data of male mice in red). Mice were sacrificed 16 days after  
1119 injection. A) Tumor size, measured by digital caliper (mass = (length x width x height) \*  $\pi/6$ )  
1120 together with representative low magnification H/E images of the retrieved lesions. Scale bar:  
1121 500  $\mu$ m. B) Quantification of double immunofluorescence analysis for KI67 positive RFP-  
1122 expressing YUMM1.7 cells in tumors. > 50 cells in 3-5 fields on digitally-retrieved images  
1123 were counted using ImageJ software looking at individual cells. n (control versus experimental  
1124 lesions) = 8; two-tailed paired t test, \* p < 0.05. C-F) FACS analysis of tumor dissociated cells  
1125 for (C) total numbers of macrophage cells (CD45<sup>+</sup> Gr-1<sup>-</sup> F4/80<sup>+</sup> CD11b<sup>+</sup>) and percentage of  
1126 macrophages in the CD45<sup>+</sup> cell populations (left and right panels, respectively), (D) percentage  
1127 of CD4<sup>+</sup> T cells (CD45<sup>+</sup> CD3<sup>+</sup> CD4<sup>+</sup>) over total CD45<sup>+</sup> leukocytes and fraction of T<sub>Regs</sub> (CD45<sup>+</sup>  
1128 CD3<sup>+</sup> CD4<sup>+</sup> FoxP3<sup>+</sup>) within CD4<sup>+</sup> T cells, (E) percentage of CD8<sup>+</sup> T cells (CD45<sup>+</sup> CD3<sup>+</sup> CD8<sup>+</sup>)

1129 over total CD45<sup>+</sup> leukocytes and (F) of CD44<sup>+</sup> population of CD8<sup>+</sup> T cells together with mean  
1130 fluorescence intensity levels of LAG-3 and PD-1 staining in CD44<sup>+</sup> fraction cells. n (control  
1131 versus experimental lesions) = 8; two-tailed paired t test, \*P < 0.05; \*\* P < 0.01.

1132

1133

1134 **Supplementary Figure 1. Related to Figure 1A. Double immunofluorescence analysis of**  
1135 **patient-derived melanocytic lesions.** Double immunofluorescence images of benign nevi (A,  
1136 B), dysplastic nevi (C), and metastatic melanoma (D) in parallel with flanking skin stained with  
1137 anti-MelanA (green) and anti-AR (ab74272) (red) antibodies. Highlighted in the lower panels  
1138 are representative MelanA positive cells and areas used for quantification in Figure 1A. Scale  
1139 bar: 10  $\mu$ m.

1140

1141 **Supplementary Figure 2. Related to Figure 1B. Double immunofluorescence analysis of**  
1142 **patient-derived melanocytic lesions.** Immunofluorescence staining of benign nevi (A, patient  
1143 1 and 2), dysplastic nevi (B, patient 3 and 4), primary melanoma (C, patient 5 and 6) and  
1144 metastatic melanoma (D, patient 7 and 8) skin tissues with anti-MelanA (green) and anti-  
1145 AR(ab74272) (red) antibodies, and topographically distinct areas (boxes 1, 2 and 3) utilized  
1146 for single cell AR expression quantification in Fig. 1B. Shown are representative low and high  
1147 magnification images of the areas used for quantification. Scale bar: 2 mm and 20  $\mu$ m,  
1148 respectively.

1149

1150 **Supplementary Figure 3. Related to Figure 1C. AR expression across age and between**  
1151 **sexes in a melanoma tissue microarray.** Quantification of AR fluorescence signal in MelanA-  
1152 positive cells in a tissue microarray of melanoma patients divided by age or sex. Quantification  
1153 was based on digitally-acquired images of three independent fields per clinical lesion (a  
1154 minimum of 50 cells per field) on the arrays. Results are expressed as average values for each  
1155 lesion (dots) together with mean across years of age (left) or sex (right) of patients.

1156

1157 **Supplementary Figure 4. Related to Figure 1D. Immunohistochemical analysis of AR**  
1158 **expression in patient-derived melanocytic lesions.** Immunohistochemical staining with anti-  
1159 MelanA and anti-AR (ab74272) antibodies of parallel sections of different melanomas with  
1160 high (A), intermediate (B) and low (C) level of AR expression as quantified by double

1161 immunofluorescence analysis in Fig. 1B. Shown are representative images, with enlarged  
1162 boxed areas shown in Fig. 1D. Scale bar: 50  $\mu$ m

1163

1164 **Supplementary Figure 5. Related to Figure 1E. Immunofluorescence analysis of AR**  
1165 **expression in different melanoma cell lines and primary human melanocytes with**  
1166 **prostate cancer cells as comparison.** Representative images of the indicated prostate cancer  
1167 cells lines (LnCaP, 22RV.1), melanoma cell lines and primary melanoma cells with high  
1168 (WM1366, WM1552C, WM983A) and low AR (MM131206, SKMEL5) expression and  
1169 primary human melanocytes (strain a) stained with anti-AR (red) antibody (D6F11) and DAPI  
1170 (blue) nuclear staining. Scale bar: 10  $\mu$ m.

1171

1172 **Supplementary Figure 6. Related to Figure 1. AR expression in different melanoma cell**  
1173 **lines and primary human melanocytes as detected by two different antibodies.** AR  
1174 expression) in melanoma cell lines (A375, SKMEL28, WM1366, WM115 and M14) and  
1175 primary human melanocytes was assessed by immunoblot analysis with two different  
1176 antibodies in parallel with prostate cancer cell lines (LnCaP, 22RV.1) as comparison. All  
1177 extracts were run in two parallel gels and blotted, respectively, with anti-AR (D6F11) (A) or  
1178 anti-AR (PG-21) antibodies (B). Shown are low and high exposure images of the same blots,  
1179 for better AR detection in highly expressing prostate cancer versus melanoma cells. Note a  
1180 band of the expected molecular size for full length AR proteins (110 KD) detected in all tested  
1181 cells and a second band around 60KD detected by the two antibodies, as a possible product of  
1182 proteolytic cleavage. C) RT-qPCR analysis of AR mRNA expression in a panel of melanoma  
1183 cell lines (red), early passage primary melanoma cells (blue) and primary human melanocytes  
1184 (grey). Results are expressed as relative to RRLP0 values.

1185

1186 **Supplementary Figure 7. Related to Figure 2A-F. Silencing of AR in different melanoma**  
1187 **cell lines.** A) Down-modulation of AR expression in a panel of melanoma cell lines and  
1188 primary melanoma cells (M121008, MM131206, MM141022) infected with 2 AR silencing  
1189 lentiviruses versus empty control (5 days after infection) was assessed by RT-qPCR. Data are  
1190 shown as mean  $\pm$  SD, 1-way ANOVA with Dunnett's test. n = 3 biological replicates  
1191 (experiments). \*P < 0.05; \*\* P < 0.01; \*\*\*P < 0.005; \*\*\*\*P < 0.001. B) Immunoblot analysis  
1192 of AR protein expression in different melanoma cell lines plus/minus AR gene silencing as in  
1193 previous panel. Shown are the immunoblots together with the corresponding quantification of

1194 AR protein levels after densitometric scanning of the autoradiographs, utilizing actin signal for  
1195 normalization (lower panels).

1196

1197 **Supplementary Figure 8. Related to Figure 2A-C. Suppression of melanoma proliferation**

1198 **and self-renewal potential by AR silencing.** A) Cell density assays (CellTiter-Glo) were

1199 carried out with the indicated melanoma cell lines and primary melanoma cells (M121008,

1200 MM131206, MM141022) infected with two AR silencing lentiviruses versus empty vector

1201 control. Results are presented as luminescence intensity values relative to day 1. B, C) Colony

1202 and sphere formation assays with indicated melanoma cell lines plus/minus AR silencing.

1203 Shown are the results of 3 independent experiments quantifying in each case 3 dishes per

1204 conditions (indicated by dots, mean  $\pm$  SD). Results are presented as mean  $\pm$  SD, 1-way

1205 ANOVA with Dunnett's test. n = 3 biological replicates (experiments). \*\* P < 0.01; \*\*\*P <

1206 0.005; \*\*\*\* <0.001.

1207

1208 **Supplementary Figure 9. Related to Figure 2D-F. EdU incorporation, apoptosis and**

1209 **senescence assays in melanoma cells plus/minus AR silencing.** Indicated melanoma cell

1210 lines infected with two AR silencing lentiviruses versus empty vector control were tested by

1211 EdU labelling assay (A), AnnexinV staining (B) and senescence-associated beta-GAL staining

1212 (C) 5 days post virus infection. AnnexinV/SA-beta-GAL -positive cells were counted using

1213 ImageJ software. Shown are representative images and results of 3 independent experiments

1214 quantifying in each case 3 dishes per conditions (indicated by dots, mean  $\pm$  SD), 1-way

1215 ANOVA with Dunnett's test. n = 3 biological replicates (experiments). \*P < 0.05; \*\* P < 0.01;

1216 \*\*\*P < 0.005, \*\*\*\*P < 0.001.

1217

1218 **Supplementary Figure 10. Related to Figure 2G. Concomitant AR overexpression**

1219 **suppresses AR silencing effects.** A) Quantification of AR protein expression by

1220 immunofluorescence analysis of A375 cells stably infected with a lentiviral vector for

1221 constitutive AR expression versus LacZ control and superinfected with two AR silencing

1222 lentiviruses versus vector control for 5 days. Shown is a violin plot quantification of AR

1223 immunofluorescence signal intensity, with corresponding representative images shown in Fig.

1224 2G. n (cells per condition) > 20, 1-way ANOVA with Dunnett's test, \*\*\*\*P < 0.001. B)

1225 Quantification of AR mRNA expression by RT-qPCR analysis of A375 cells plus/minus AR

1226 overexpression and silencing as in the previous panel. Same samples were analyzed for levels

1227 of *CDKN1A* expression as a marker/effector of cellular senescence induced by AR gene

1228 silencing. C) Proliferation live-cell imaging assays of A375 cells plus/minus AR  
1229 overexpression and silencing as in the previous panel. Cells were plated in triplicate wells in  
1230 96-well plate followed by cell density measurements ((Incucyte™ system, Essen  
1231 Instruments; 4 images per well every 4 hours for 128 hours). n (number of wells) = 3, Pearson  
1232 r correlation test. \*\* P < 0.01. D, E) Same melanoma cell as in the previous panels were tested  
1233 by EdU labelling assay (D) or apoptosis by annexin V staining (E). For each condition, cells  
1234 were tested in duplicated dishes, with all experiments repeated 3 times. Data are shown as mean  
1235 ± SD, 1-way ANOVA with Dunnett's test. n = 3 independent experiments. \*\*P < 0.01. \*\*\*  
1236 P<0.005.

1237

1238 **Supplementary Figure 11. Related to Figure 3B-D. Growth suppressive effects of AR**  
1239 **inhibitors on melanoma cells.** A) Immunoblot analysis of AR protein expression in the  
1240 indicated melanoma cell lines treated with AZD3514 (10 µM for 48 hours) versus DMSO  
1241 control. B) Cell density assays (CellTiter-Glo) of the indicated melanoma cell lines and primary  
1242 melanoma cells (MM130926, MM141022) treated with AZD3514 (10 µM) versus solvent  
1243 control (DMSO). Cells were plated on triplicate wells in 96-well dishes followed by cell  
1244 density / metabolic activity measurements at the indicated days after treatment. Results are  
1245 presented as luminescence intensity values relative to day 1. C) EdU labelling assays of the  
1246 indicated melanoma cells treated with AZD3514 (10 µM) versus solvent control (DMSO) at  
1247 day 5 after treatment. Data are shown as mean ± SD, 1-way ANOVA with Dunnett's test. n =  
1248 3 biological replicates (experiments). \*P < 0.05; \*\* P < 0.01; \*\*\*P < 0.005.

1249

1250 **Supplementary Figure 12. Related to Figure 3E, F. Growth stimulatory effects of**  
1251 **dihydrotestosterone (DHT) treatment of melanoma cells.** A) Proliferation live-cell imaging  
1252 assays of the primary melanocytes (strain f) and SKMEL5 melanoma cells treated with the  
1253 different doses of DHT (5, 10, 20 nM) versus DMSO control by live-cell imaging. Cells  
1254 cultured in medium with charcoal-treated serum were plated in triplicate wells in 96-well plates  
1255 followed by cell imaging measurements (Incucyte™ system, Essen Instruments), capturing  
1256 4 images per well every 4 hours for the indicated number of hours. n (number of wells) = 3,  
1257 Pearson r correlation test. \*P < 0.05; B) Cell density assays of the indicated melanoma cell  
1258 lines and primary melanoma cells (MM130926, MM141022) treated with the AR agonist DHT  
1259 (20 nM) versus solvent control (DMSO). Cells cultured in medium with charcoal-treated serum  
1260 were plated on triplicate wells in 96-well dishes followed by cell density / metabolic activity  
1261 measurements (CellTiter-Glo) at the indicated days after treatment. Results are presented as

1262 luminescence intensity values relative to day 1. C) Proliferation live-cell imaging assays of the  
1263 indicated melanoma cells treated with the DHT (20 nM) versus DMSO control. Assay  
1264 conditions were as in (A). n (number of wells) = 3, Pearson r correlation test. \*P < 0.05; \*\* P  
1265 < 0.01. D) Cell density assays of the indicated melanoma cells tested under very sparse  
1266 condition. Cells were cultured in medium with charcoal-treated serum for 48 hours followed  
1267 by plating at very low numbers (500 cells in 60 mm-dish) in the same medium plus/minus  
1268 treatment with DHT (10 and 20 nM) versus solvent control (DMSO) for 7 days. Data are  
1269 represented as relative cell density as quantified by ImageJ analysis of crystal violet stained  
1270 dishes. 1-way ANOVA with Dunnett's test. n = 3 independent experiments. \*P < 0.05; \*\* P <  
1271 0.01; \*\*\*P < 0.005. All the DHT treatment experiments were carried out in charcoal-stripped  
1272 medium.

1273

1274 **Supplementary Figure 13. Related to Figure 4B. Impact on melanoma cells gene**  
1275 **expression of AR gene silencing.** Expression of the indicated genes of interest in a panel of  
1276 melanoma cell lines, primary melanoma (M141022) and primary melanocytes infected with  
1277 two AR silencing lentiviruses versus empty vector control, was assessed by RT-qPCR with  
1278 RPLP0 for normalization. Data, shown as individual plots per cell line, correspond to those  
1279 shown as heat map in Fig. 4B.

1280

1281 **Supplementary Figure 14. Related to Figure 4E. Prevalence of stromal and immune**  
1282 **cells in TCGA-SKCM samples with and without enrichment for the AR silencing gene**  
1283 **signature.** Heatmaps reporting mean fractions of stromal and immune cell types (columns)  
1284 for TCGA-SKCM samples with AR silencing signature up or down (rows) obtained using  
1285 EPIC (A) and CIBERSORTx (B). Red intensity is proportional to the mean cell fraction,  
1286 which is also reported in each entry. Cell types showing a significantly different prevalence  
1287 (Wilcoxon rank-sum test, Bonferroni-adjusted p-value < 0.05) between samples with AR  
1288 silencing signature up or down are highlighted with a “\*”.

1289

1290 **Supplementary Figure 15. Related to Figure 7. AR silencing inhibits WM1366 melanoma**  
1291 **tumorigenesis.** Double immunofluorescence analysis of lesions from Figure 7A with  
1292 antibodies against AXL, for melanoma cells identification and CD45 positive cells. Shown is  
1293 the quantification together with representative images of CD45 positive cells per AXL positive  
1294 tumor area, counting in each 5 fields, 5 male mice and 5 female mice, data of male mice in red.  
1295 Scale bar: 20  $\mu$ m.

1296

1297 **Supplementary Figure 16. Related to Figure 7. AR silencing inhibits A375 melanoma**

1298 **tumorigenesis.** A375 melanoma cells infected with an AR-silencing virus versus vector

1299 control were tested by parallel intradermal Matrigel injections into NOD/SCID male and

1300 female mice (5 per group, data of male mice in red). Mice were sacrificed 16 days after

1301 injection. A) Tumor size, measured by digital caliper (mass = (length x width x height) \*  $\pi/6$ )

1302 together with representative low magnification H/E images of the retrieved lesions. B) Double

1303 immunofluorescence analysis of lesions with antibodies against MelanA (green), for melanoma

1304 cells identification, and KI67 (B) positive cells. Shown are representative images of MelanA

1305 positive cells stained with antibodies against the other markers, together with relative

1306 quantification, (counting in each case >50 cells in 3-5 fields on digitally-retrieved images,

1307 using ImageJ software). C) double immunofluorescence analysis of lesions with antibodies

1308 against MelanA, CD45 and F4/80, for melanoma cells, hematopoietic cells as well as

1309 macrophages identification, respectively. Shown are representative images together with

1310 quantification of number of F4/80 positive cells per MelanA positive tumor area, counting in

1311 each case 3-4 fields. n (control versus experimental lesions) = 20, two-tailed paired t test, \*P

1312 < 0.05; \*\* P < 0.01; \*\*\*P < 0.005. Scale bars: 10  $\mu$ m.

1313

1314 **Supplementary Figure 17. Related to Figure 7. AR silencing inhibits SKMEL28**

1315 **melanoma tumorigenesis.** SKMEL28 melanoma cells infected with an AR-silencing virus

1316 versus vector control were tested by parallel intradermal Matrigel injections into NOD/SCID

1317 male and female mice (3 per group, male mice). Mice were sacrificed 16 days after injection.

1318 A) Tumor size, measured by digital caliper (mass = (length x width x height) \*  $\pi/6$ ) together

1319 with representative low magnification H/E images of the retrieved lesions. Scale bars: 100  $\mu$ m.

1320 B) Double immunofluorescence analysis of lesions with antibodies against MelanA (green),

1321 for melanoma cells identification, and KI67 positive cells. Shown are representative images of

1322 MelanA positive cells stained with antibodies against KI67, together with relative

1323 quantification, (counting in each case >50 cells in 3-5 fields on digitally-retrieved images,

1324 using ImageJ software). C) double immunofluorescence analysis of lesions with antibodies

1325 against MelanA, CD45 for melanoma cells, hematopoietic cells identification, respectively.

1326 Shown are representative images together with quantification of number of CD45 positive cells

1327 per MelanA positive tumor area, counting in each case 3-4 fields. n (control versus

1328 experimental lesions) = 6, two-tailed paired t test, \*P < 0.05. Scale bars: 10  $\mu$ m.

1329



1330 **Supplementary Figure 18. Related to Figure 8. AZD3514 pretreatment inhibits WM1366**  
1331 **melanoma tumorigenesis.** WM1366 melanoma cells pretreated with an AR inhibitor  
1332 AZD3514 versus DMSO control were tested by parallel intradermal Matrigel injections into  
1333 NOD/SCID male and female mice (4 per group, data of male mice in red). Mice were sacrificed  
1334 16 days after injection. A) Tumor size, measured by digital caliper (mass = (length x width x  
1335 height) \*  $\pi/6$ ) together with representative low magnification H/E images of the retrieved  
1336 lesions. B): Double immunofluorescence analysis of lesions with antibodies against AXL  
1337 (green), for melanoma cells identification, and KI67 positive cells. Shown are representative  
1338 images of AXL positive cells stained with antibodies against KI67, together with relative  
1339 quantification, (counting in each case >50 cells in 3-5 fields on digitally-retrieved images,  
1340 using ImageJ software). C) double immunofluorescence analysis of lesions with antibodies  
1341 against AXL, CD45 and F4/80, for melanoma cells, hematopoietic cells as well as macrophages  
1342 identification, respectively. Shown are representative images together with quantification of  
1343 number of F4/80 positive cells per AXL positive tumor area, counting in each case 3-4 fields.  
1344 n (control versus experimental lesions) = 16, two-tailed paired t test, \*P < 0.05; \*\* P < 0.01;  
1345 \*\*\*P < 0.005. Scale bars: 10  $\mu$ m.

1346  
1347 **Supplementary Figure 19. Related to Figure 9. Suppression of mouse melanoma**  
1348 **proliferation by AR silencing.** A) Level of AR mRNA with shRNA mediated silencing of AR  
1349 in mouse melanoma cell line YUMM1.7. B) Expression levels of AR mRNA in YUMM1.7  
1350 infected with 2 AR silencing lentiviruses versus empty control as assessed by RT-qPCR. Data  
1351 are shown as mean  $\pm$  SD, 1-way ANOVA with Dunnett's test. n = 3 biological replicates  
1352 (experiments). C) Cell density assays were carried out with YUMM1.7 infected with two AR  
1353 silencing lentiviruses versus empty vector control. Results are presented as luminescence  
1354 intensity values relative to day 1. D) YUMM1.7 infected with two AR silencing lentiviruses  
1355 versus empty vector control were tested by EdU labelling assay 5 days post virus infection.  
1356 Data are shown as mean  $\pm$  SD, 1-way ANOVA with Dunnett's test. n = 3 biological  
1357 experiments. E) YUMM1.7 were plated on triplicate wells in 96-well dishes followed by  
1358 CellTiter-Glo metabolic activity measurements at the indicated days after treatment of  
1359 AZD3514. Results are presented as luminescence intensity values relative to day 1. Data are  
1360 shown as mean  $\pm$  SD, 1-way ANOVA with Dunnett's test. n = 3 biological replicates  
1361 (experiments). \*P < 0.05; \*\* P < 0.01; \*\*\*\*P < 0.001.

1362  
1363

1364

1365

1366 **Table 1. Related to Figure 1. Summary table of patient information of tissue microarray.**

1367

1368 **Table 2. Related to Figure 1. Summary table of a panel of human melanoma cell lines**  
1369 **used in this study.** The details of genetic mutations, different clinical histories, AR mRNA  
1370 levels and growth inhibition/stimulation effects after AR silencing by shAR or AZD3514 (10  
1371  $\mu$ M) and DHT (20 nM) treatment are indicated for each cell type.

1372

1373 **Table 3. Related to Figure 3. List of 155 genes up/down-modulated by AR silencing in**  
1374 **three melanoma cell lines (WM1366, SKMEL28 and WM115) from transcriptomic**  
1375 **profiling.**

1376

1377 **Table 4. Related to Figure 3. List of gene sets significantly associated with differentially**  
1378 **expressed genes in melanoma cells upon AR gene silencing.**

1379

1380 **Table 5. Related to Figure 3. List of perturbagens with concordance with AR signatures**  
1381 **including the associated p-values from iLINCS database.**

1382

1383 **Table 6. List of reagents and resources.**

1384

1385

# Figure 1

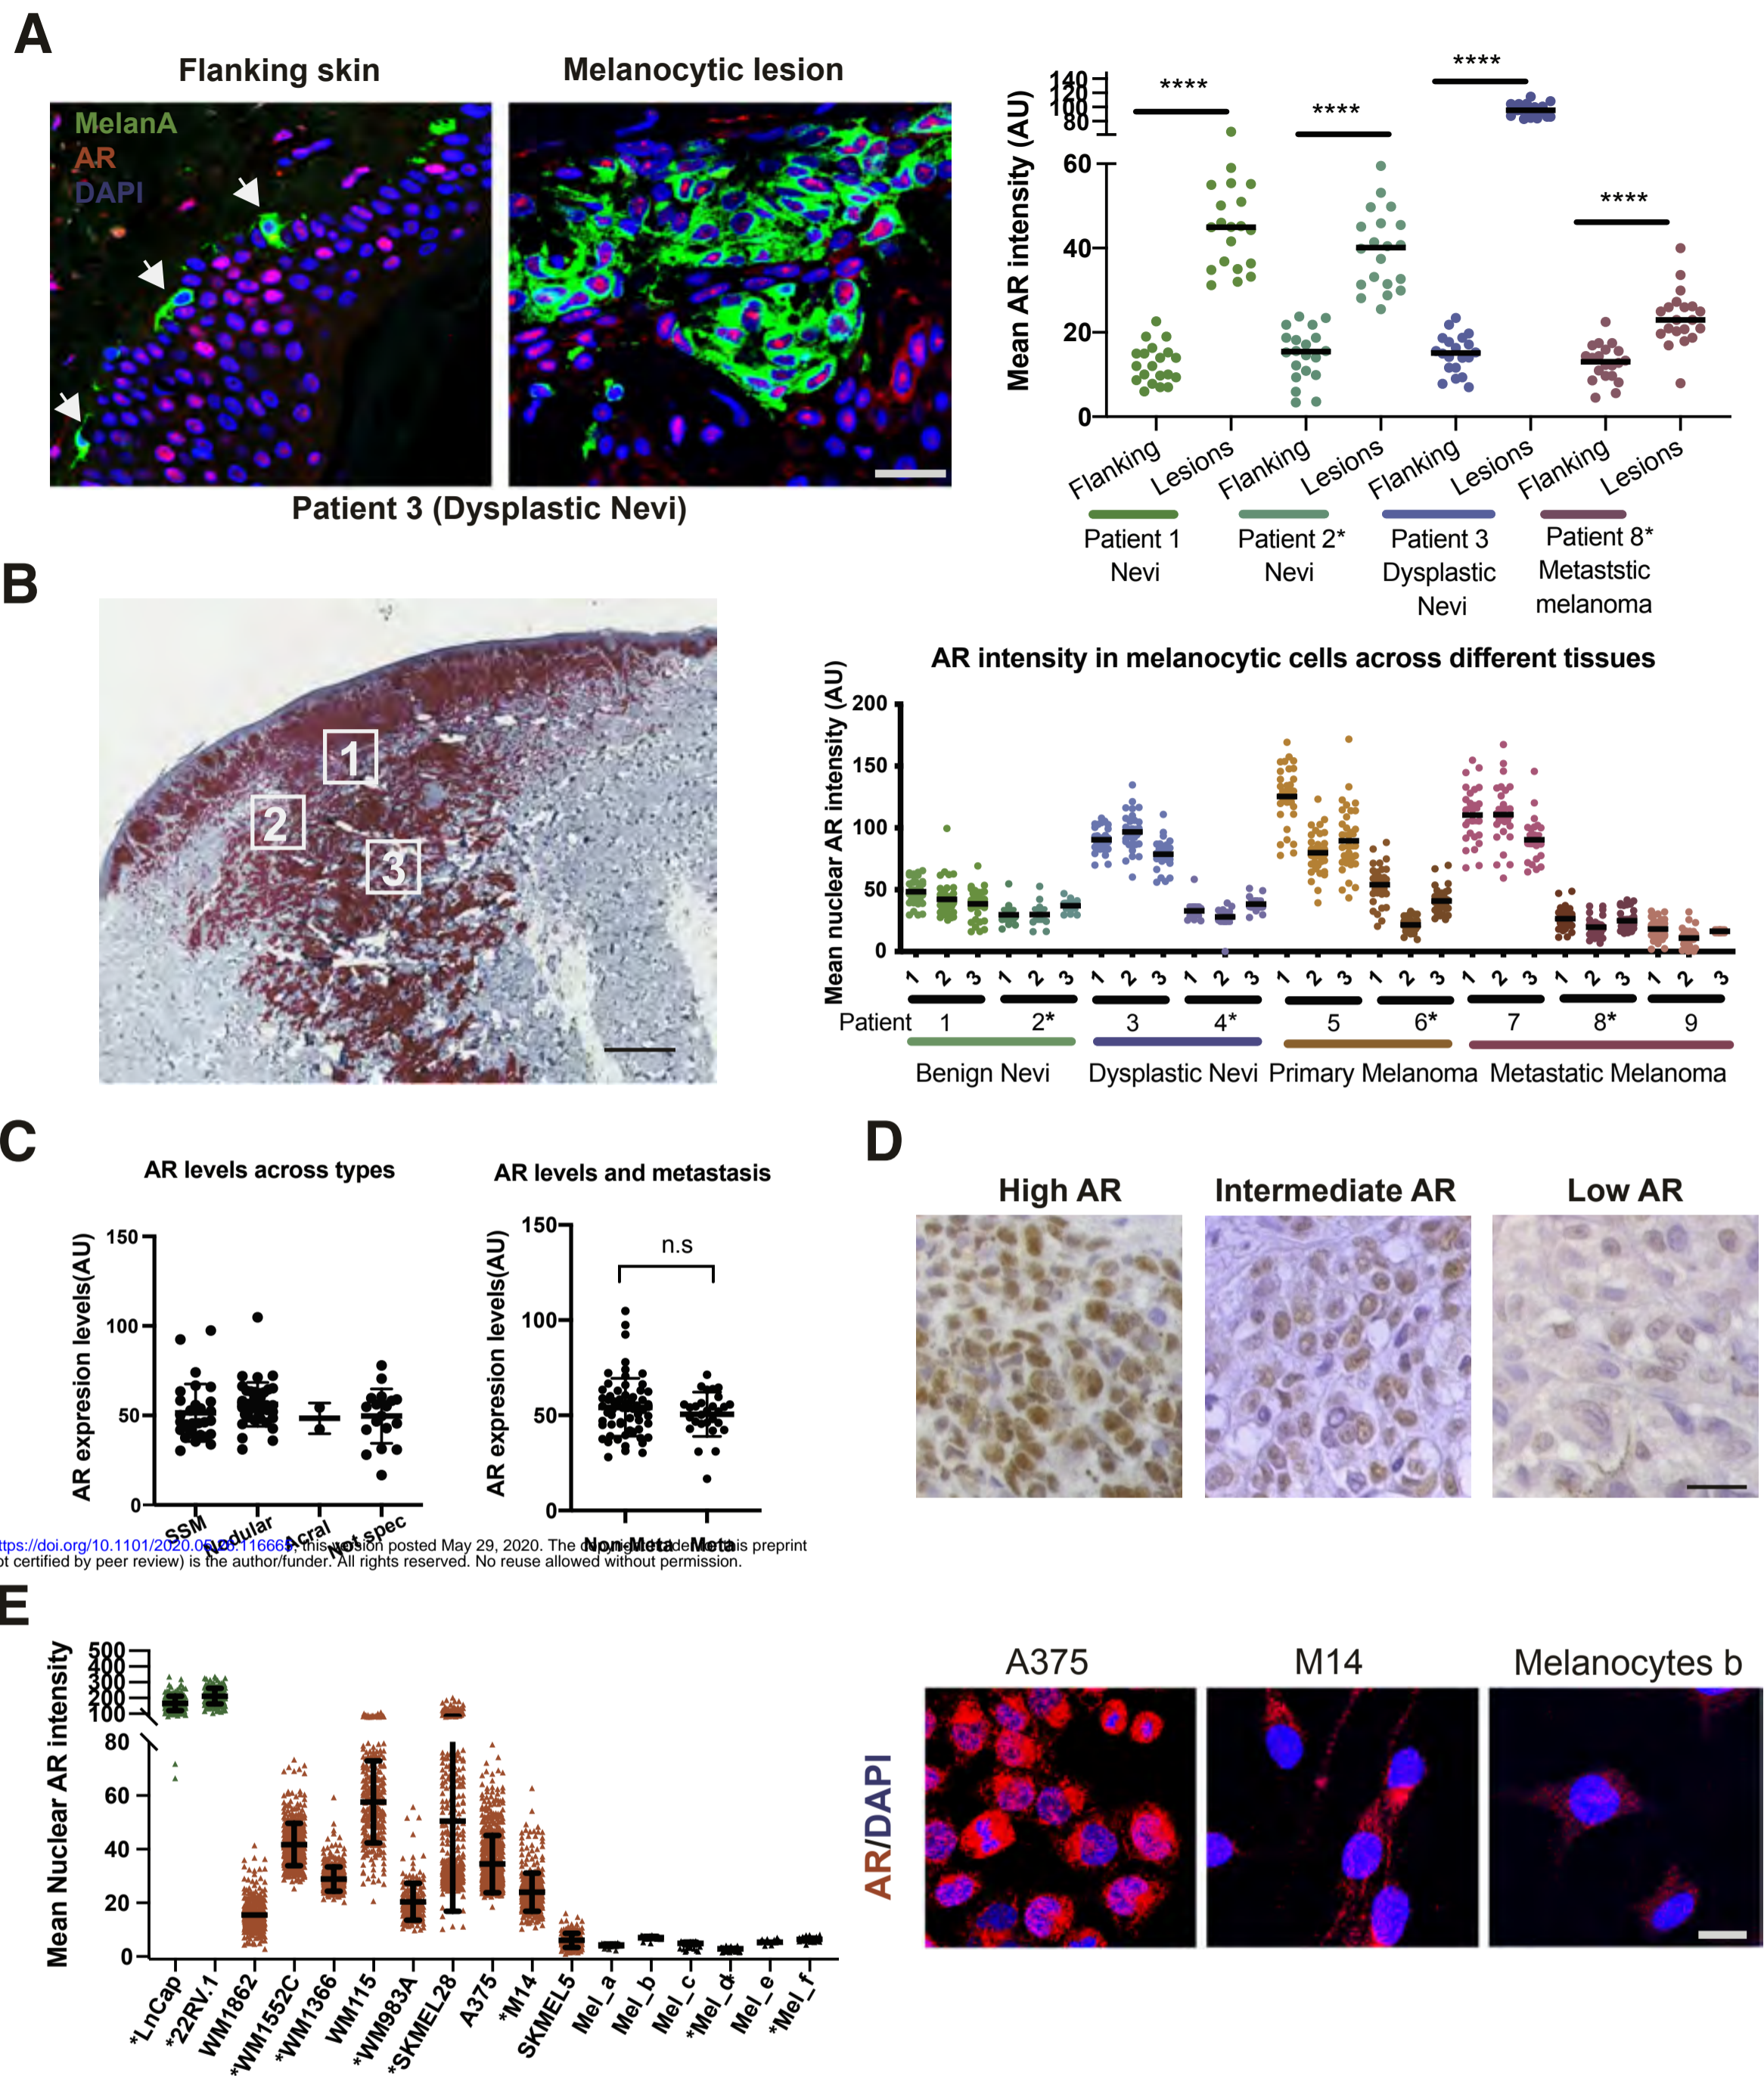

**Figure 1. AR expression in melanoma cells.**

**A) Left:** Representative images of AR expression in cells of melanocytic lesions versus melanocytes in flanking normal skin (arrows) stained by double immunofluorescence with antibodies against AR (red) and MelanA (green) for melanocytes identification, with DAPI staining for nuclear localization (blue). Scale bar 30  $\mu$ m. Additional images of this and other lesions are shown in Supplementary Figure 1. **Right:** Quantification of nuclear AR fluorescence signal in individual MelanA-positive cells (dots) of benign nevi, dysplastic nevi and metastatic melanomas versus melanocytes of flanking skin (samples from male patients in this and following panels are indicated by asterisks). Arbitrary fluorescence intensity values (AU) per individual cells are indicated together with mean and statistical significance (unpaired t test, \*\*\*\* < 0.001). **B) Left:** Immunohistochemical staining of a primary melanoma lesion with anti-MelanA antibodies and topographically distinct areas (boxes 1, 2 and 3) analyzed for single cell AR expression by double immunofluorescence of parallel sections with anti AR and MelanA antibodies. Scale bar 500  $\mu$ m. Immunofluorescence images of cells in this and other lesions are shown in Supplementary Figure 2. **Right:** Quantification of nuclear AR fluorescence signal in individual MelanA-positive cells (dots) from three topographically delimited areas (numbered as in B) of benign nevi, dysplastic nevi, primary and metastatic melanomas from different patients. Arbitrary fluorescence intensity values (AU) per individual cells are indicated together with the mean. **C)** Quantification of AR fluorescence signal in MelanA-positive cells in a tissue microarray of different types of melanoma patients with different clinical histories (left) and of metastatic and non-metastatic form (right). SSM = Superficial Spreading Melanoma. Acral = acral lentiginous melanoma. Quantification was based on digitally-acquired images of three independent fields per clinical lesion (a minimum of 50 cells per field) on the arrays. Results are expressed as average values for each lesion (dots) together with mean per type of lesions and primary versus metastatic. Quantification of samples divided by sex and age of patients is provided in Supplementary Figure 3. Patient sample details together with clinical diagnosis, age and sex is provided in Supplementary Table 1. **D)** Immunohistochemical staining with anti-AR antibodies of melanomas with high versus intermediate and low AR expression as assessed by double immunofluorescence analysis in (B). Scale bar: 30  $\mu$ m. Lower magnification images with Melan A staining of parallel sections are shown in Supplementary Figure 4. **E) Left:** Quantification of nuclear AR expression by immunofluorescence analysis of the indicated melanoma cell lines or primary melanoma cells (red) versus primary melanocytes (black), and prostate cancer cell lines (green) examining > 100 cells per sample. Values for individual cells are indicated as dots together with mean  $\pm$  SD. **Right:** Representative images of melanoma cells (A375, M14) and primary melanocytes with high versus low AR expression. Scale bar: 10  $\mu$ m. Additional images of cells are shown in Supplementary Figure 5.

## Figure 2

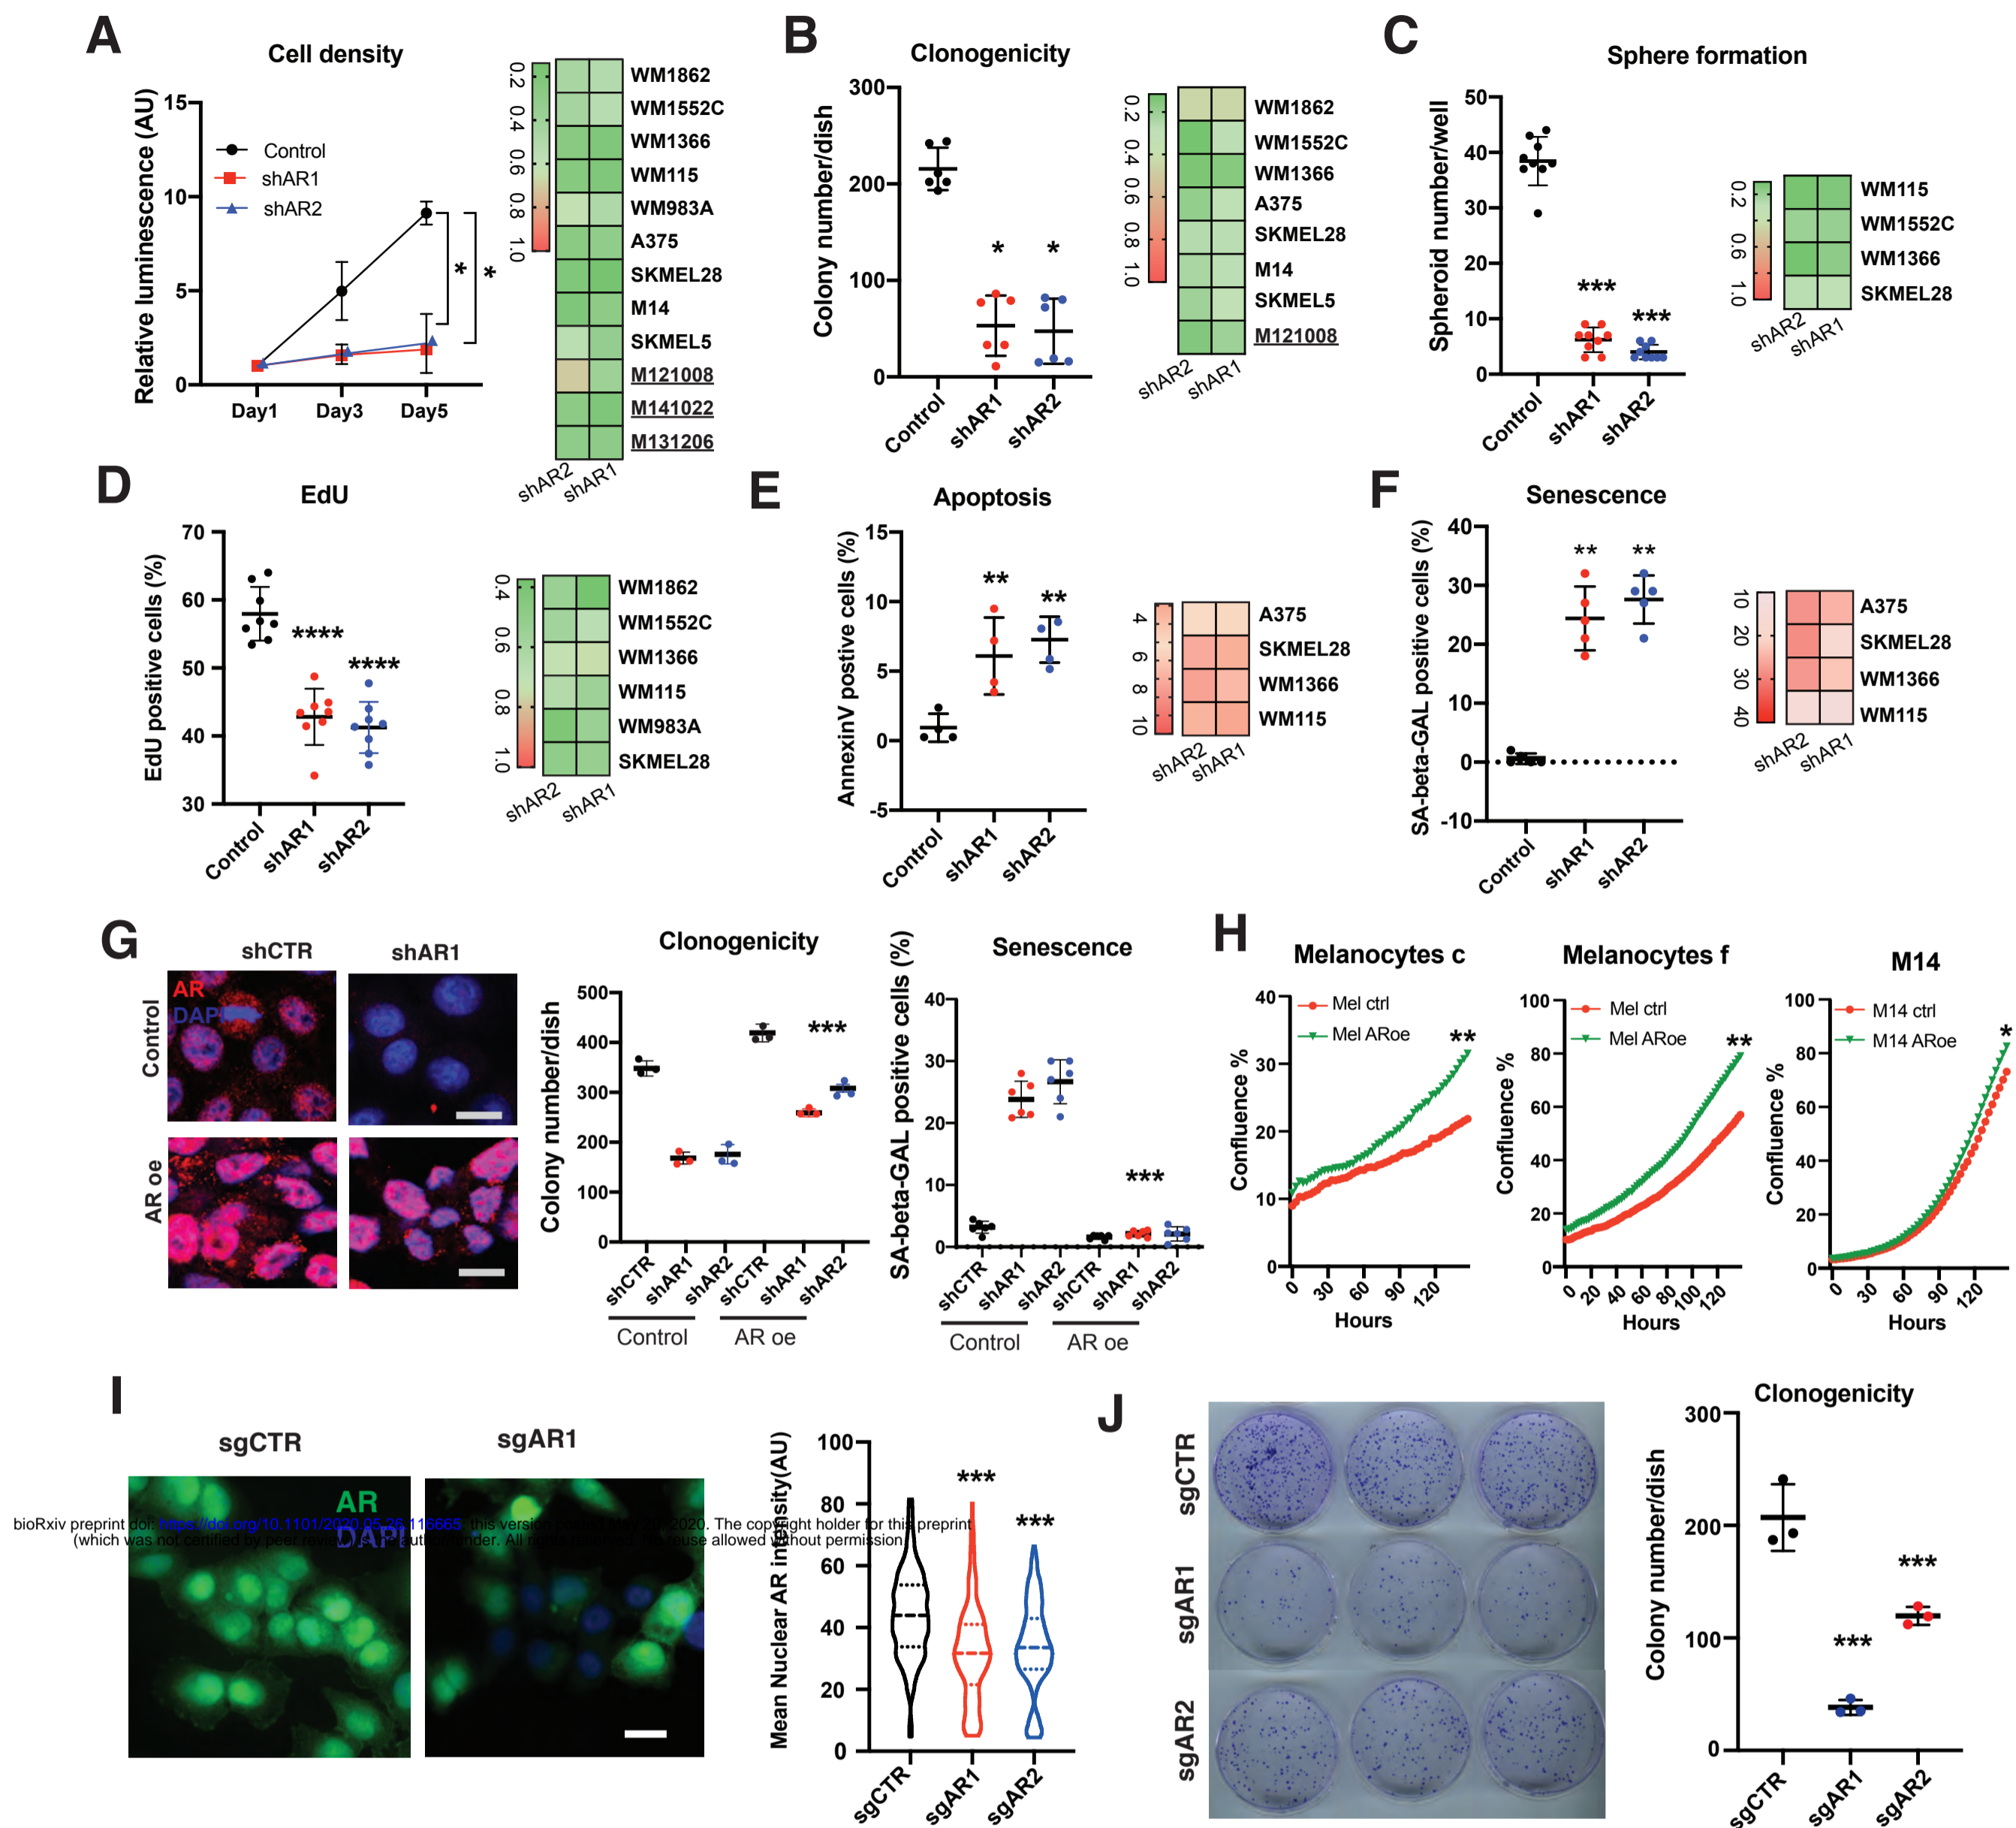

**Figure 2. AR down-modulation suppresses melanoma cell proliferation and self-renewal potential.**

**A)** Left: WM1366 melanoma cells stably infected with 2 AR-silencing lentiviruses versus empty vector control were analyzed by cell density assays (CellTiter-Glo) at the indicated days after infection and selection. Results are presented as luminescence intensity values relative to day 1. Data are shown as mean  $\pm$  SD, 1-way ANOVA with Dunnett's test.  $n = 3$  independent experiments.  $*P < 0.05$ . Right: results with additional melanoma cell lines and primary melanoma cells (M141022, M131206, M121008) presented as heat maps. Efficiency of AR gene silencing is shown in Supplementary Figure 7. Corresponding individual plot results together with statistical significance are shown in Supplementary Figure 8A. **B, C)** Proliferation potential of the indicated melanoma cells plus/minus AR silencing was assessed, at day 6 after lentivirus infection, by clonogenicity (B) or sphere formation assays (C). For each condition, cells were tested in triplicate dishes, with all experiments repeated 3 times. Results for WM1366 melanoma cells are shown as individual cultured dishes together with mean of  $\pm$  SD, 1-way ANOVA with Dunnett's test.  $n = 3$  technical replicates (experiments).  $*P < 0.05$ ;  $***P < 0.005$ . Results for other melanoma cells are presented as heat map, with individual plots for each cell line and representative images being shown in Supplementary Figure 8B, C. **D-F)** Melanoma cells plus/minus AR silencing as in the previous panels were tested by EdU labelling assay (D), apoptosis by annexin V staining (E) or senescence associated  $\beta$ -Gal activity (F). Left: quantification of the percentage of positive cells in individual cultured dishes of WM1366 melanoma cells plus/minus shAR together with mean of  $\pm$  SD, 1-way ANOVA with Dunnett's test.  $n = 3$  independent experiments).  $**P < 0.01$ ;  $****P < 0.001$ . Right: results with additional melanoma cell lines presented as heat maps with individual plots for each cell line shown in Supplementary Figure 9. **G)** Right: representative IF analysis of AR expression in A375 cells stably infected with an AR-over-expressing lentivirus or vector control and super-infected with an AR silencing lentivirus or corresponding control. Scale bar 10  $\mu$ m. Quantification of results, also in cells infected with a second AR silencing lentivirus, together with mRNA expression measurements are shown in Supplementary Figure 10A and B. Left: clonogenicity and senescence associated  $\beta$ -Gal activity assays of A375 melanoma cells plus/minus AR silencing and overexpression as indicated. Data are shown as mean  $\pm$  SD, 1-way ANOVA with Dunnett's test.  $n = 3$  dishes,  $***p < 0.005$ . Cell density, EdU labelling and apoptosis assays with A375 cells plus/minus concomitant AR overexpression and silencing are shown in Supplementary Figure 10C-E. **H)** Proliferation live-cell imaging assays (IncuCyte<sup>TM</sup> system, Essen Instruments) of the indicated primary melanocyte strains (c, f) and melanoma cells (M14) stably infected with an AR over-expressing lentivirus versus empty vector control. Cells were plated in triplicate wells in 96-well plates followed by cell density measurements (4 images per well every 4 hours for 128 hours).  $n$  (number of wells) = 3, Pearson  $r$  correlation test.  $*P < 0.05$ ;  $**P < 0.01$ . **I)** Representative images and quantification of AR expression by IF analysis of dCas9-KRAB-expressing A375 cells infected with lentiviruses expressing two single guide RNAs targeting the AR promoter region (sgAR1, sgAR2) versus scrambled single guide RNA control (sgCTR) for 3 day. Scale bar 10  $\mu$ m. Violin plot showed the nuclear AR fluorescence intensity, together with mean  $\pm$  SD,  $n > 300$  cells per sample, 1-way ANOVA with Dunnett's test.  $***p < 0.005$ . **J)** Parallel cultures of cells as in the previous panel were tested by clonogenicity assays on triplicate dishes, starting at day 3 after single guide RNA expression.  $n = 3$  biological replicates (dishes), 1-way ANOVA with Dunnett's test.  $***p < 0.005$ .

# Figure 3

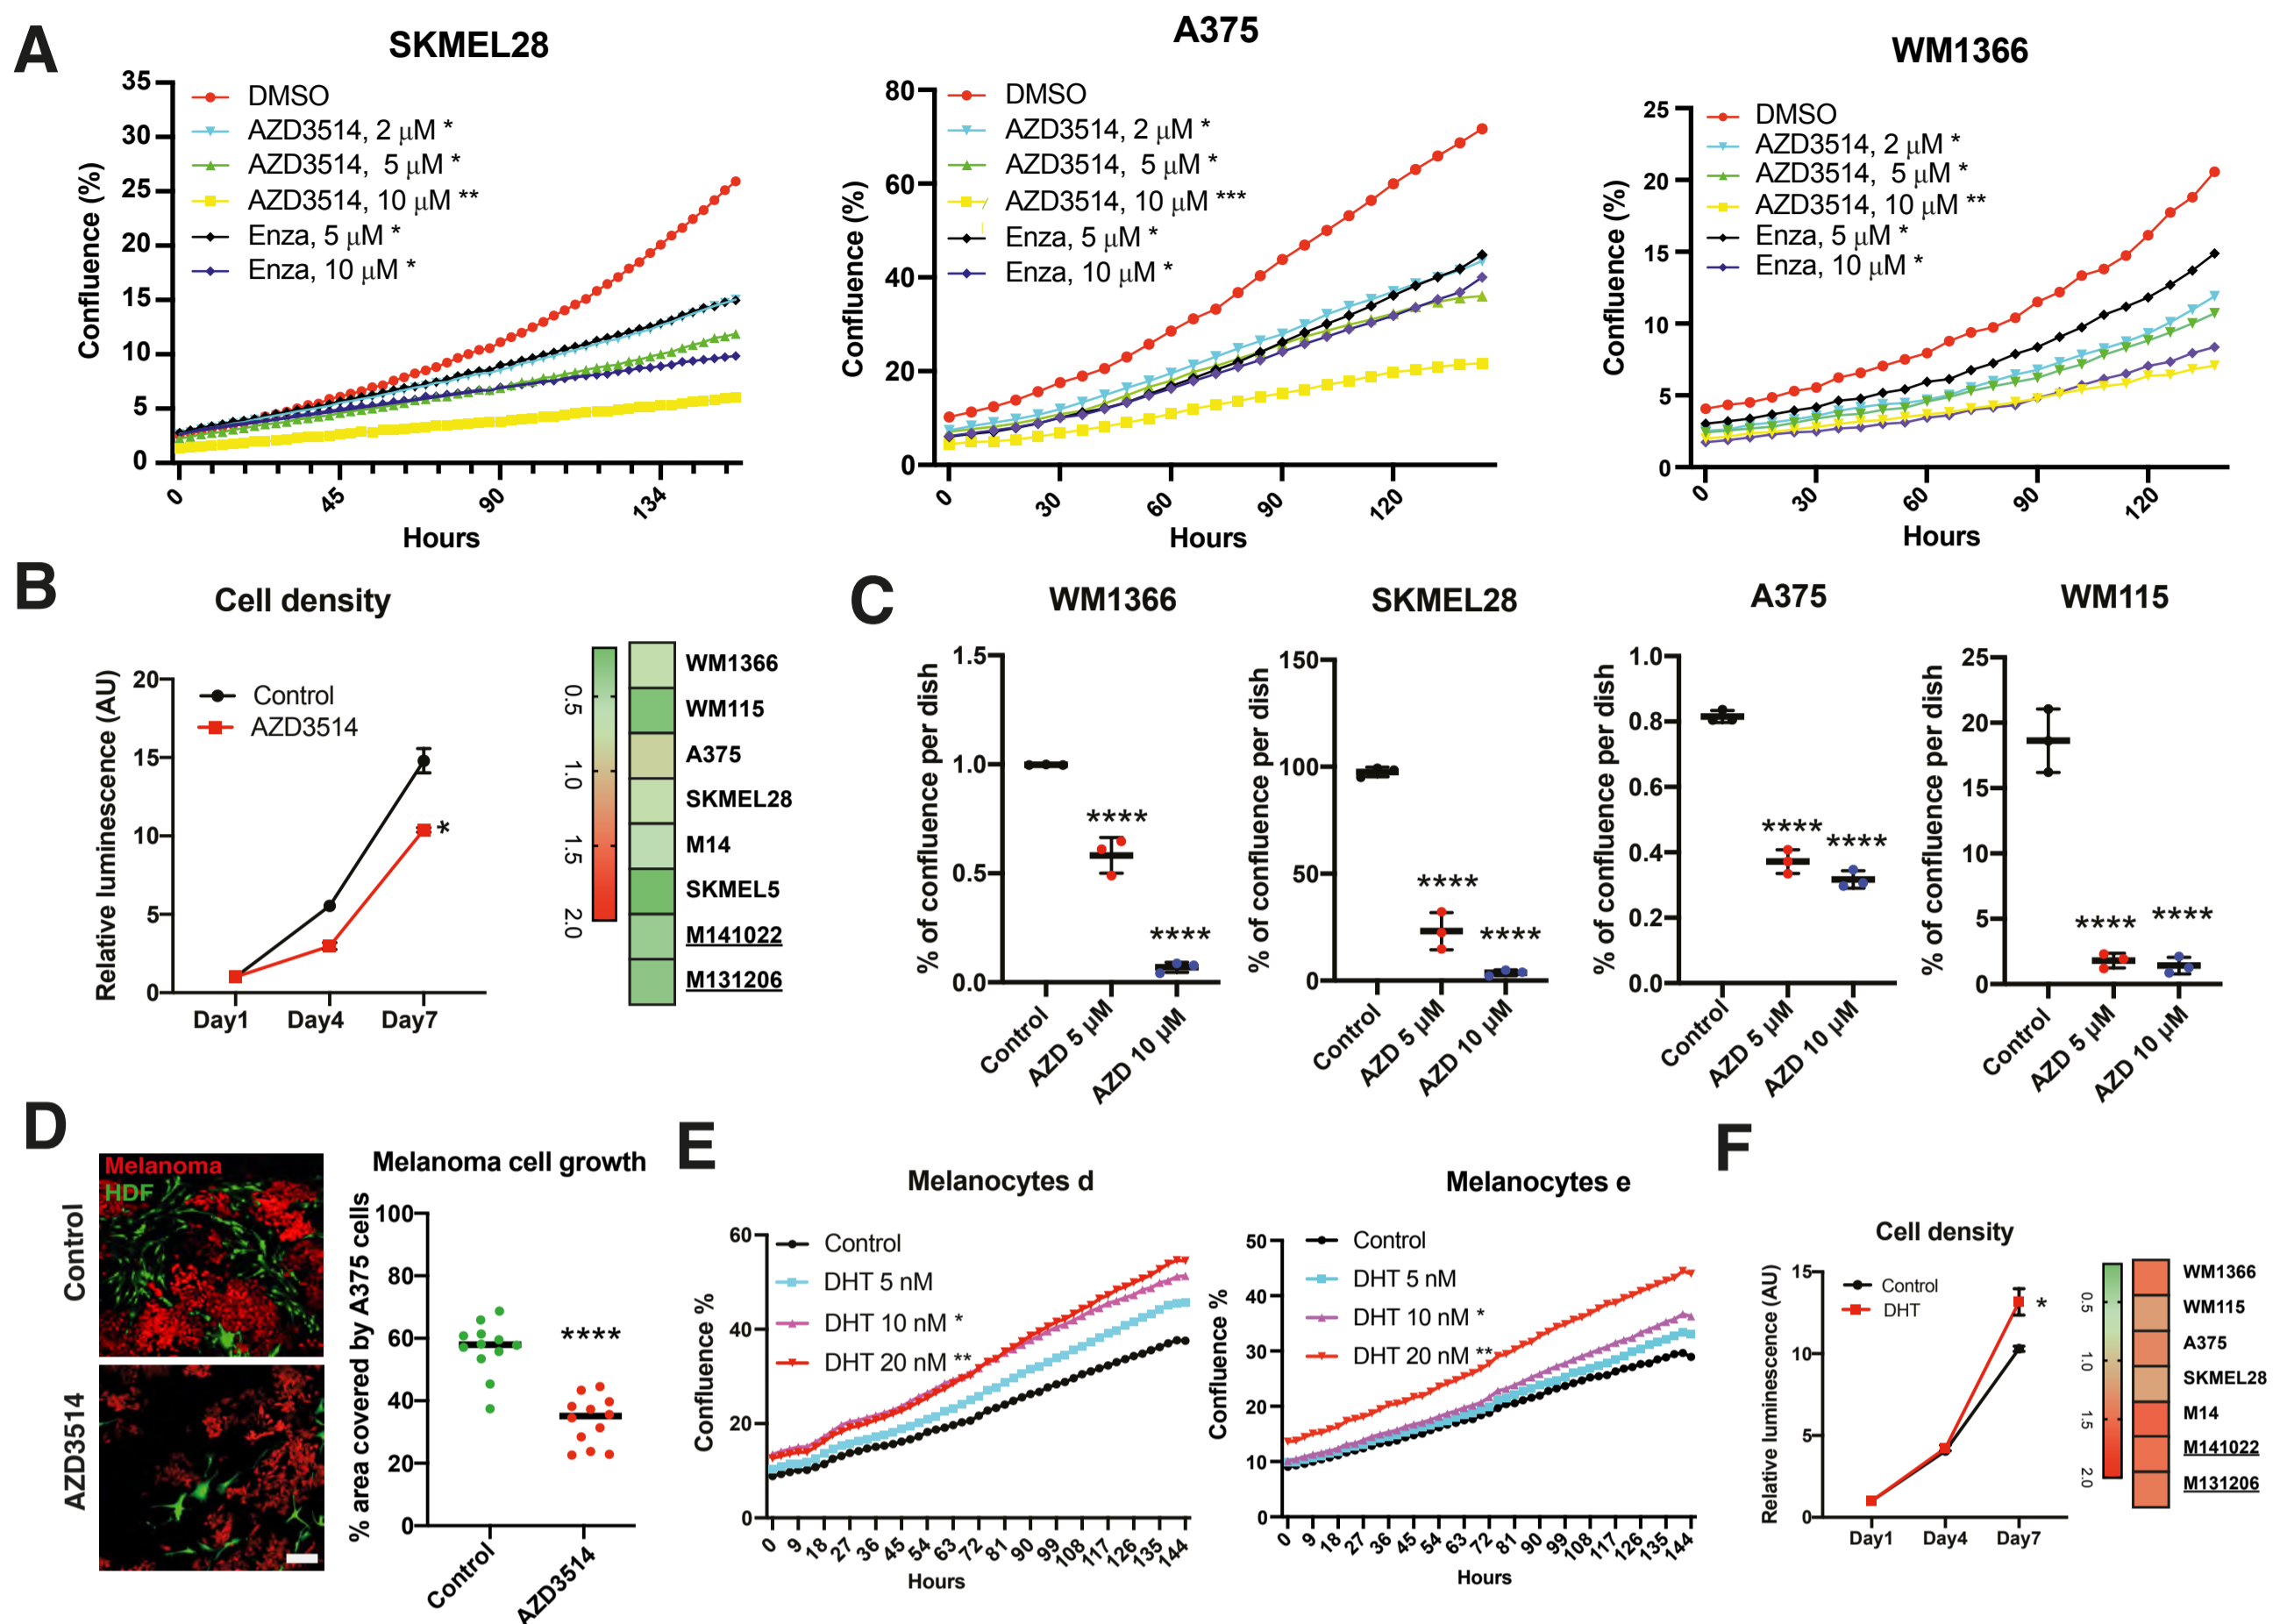

bioRxiv preprint doi: <https://doi.org/10.1101/2020.05.25.116661>; this version posted May 29, 2020. The copyright holder for this preprint (which was not certified by peer review) is the author/funder, who has granted bioRxiv a license to display the preprint in perpetuity. It is made available under aCC-BY-NC-ND 4.0 International license.

## Figure 3. Modulation of melanoma cells proliferation by pharmacological inhibition and agonist stimulation.

**A)** Proliferation live-cell imaging assays of the indicated melanoma cell lines treated with the AR inhibitors AZD3514 (2, 5, 10  $\mu\text{M}$ ) or Enzalutamide (5, 10  $\mu\text{M}$ ) versus DMSO control. Cells were plated on triplicate wells in 96-well dishes followed by cell imaging measurements (IncuCyte™ system, Essen Instruments), capturing 4 images per well every 4 hours for 140 hours. n (number of wells) = 3, Pearson r correlation test. \* $P < 0.05$ ; \*\*  $P < 0.01$ ; \*\*\* $P < 0.005$ . **B) Left:** WM1366 melanoma cells treated with AZD3514 versus DMSO control were analyzed by cell density assays (CellTiter-Glo) at the indicated days. Results are presented as luminescence intensity values relative to day 1. Data are shown as mean  $\pm$  SD, 1-way ANOVA with Dunnett's test. n = 3 independent experiments. \* $P < 0.05$ . **Right:** results with additional melanoma cell lines and primary melanoma cells (MM141022, M131206) presented as heat maps, with individual plots per cell line being shown in Supplementary Figure 11B. **C)** The indicated melanoma cells in triplicate dishes were treated with AZD3514 (5  $\mu\text{M}$  and 10  $\mu\text{M}$ ) versus vehicle control (DMSO) followed by crystal violet staining 7 days later and ImageJ determination of % of cell coverage area. Data are shown as mean  $\pm$  SD, 1-way ANOVA with Dunnett's test. n = 3 biological replicates (dishes). \*\*\*\* $P < 0.001$ . **D)** *In vitro* cancer / stromal cell expansion assays, based on the co-culture of RFP-expressing A375 melanoma cells together with GFP-expressing human dermal fibroblasts (HDF) in Matrigel in triplicate dishes, plus treatment with AZD3514 (10  $\mu\text{M}$ ) or DMSO control for 4 days. Shown are representative images and quantification of melanoma cells expansion (percentage area covered by melanoma cells per field). Each dot represents one analyzed field. n (number of fields) = 12, two-tailed paired t test, \*\*\*\* $P < 0.001$ . Scale bar: 30  $\mu\text{m}$ . **E)** Proliferation live-cell imaging assays of two primary melanocyte strains cultured in medium with charcoal-stripped serum and treated with dihydrotestosterone (DHT) at the indicated concentrations versus DMSO control. Cells were plated in triplicate wells in 96-well plates and imaged using IncuCyte™ system (Essen Instruments), every 4 hours for 145 hours. n (number of wells) = 3, Pearson r correlation test. \* $P < 0.05$ ; \*\*  $P < 0.01$ . Results of a similar assay with another primary melanocyte strain and melanoma cells are shown in Supplementary Figure 12A. **F) Left:** cell density assays (CellTiter-Glo) of WM1366 melanoma cells cultured in medium with charcoal-treated serum and treated with DHT (20 nM) versus DMSO control for the indicated days. Results are presented as luminescence intensity values relative to day 1. Data are shown as mean  $\pm$  SD, 1-way ANOVA with Dunnett's test. n = 3 independent experiments. \* $P < 0.05$ . **Right:** results of a similar assay with additional melanoma cell lines and primary melanoma cells (MM141022, M131206) presented as heat maps, with individual plots and statistical significance shown in Supplementary Figure 12B.

# Figure 4

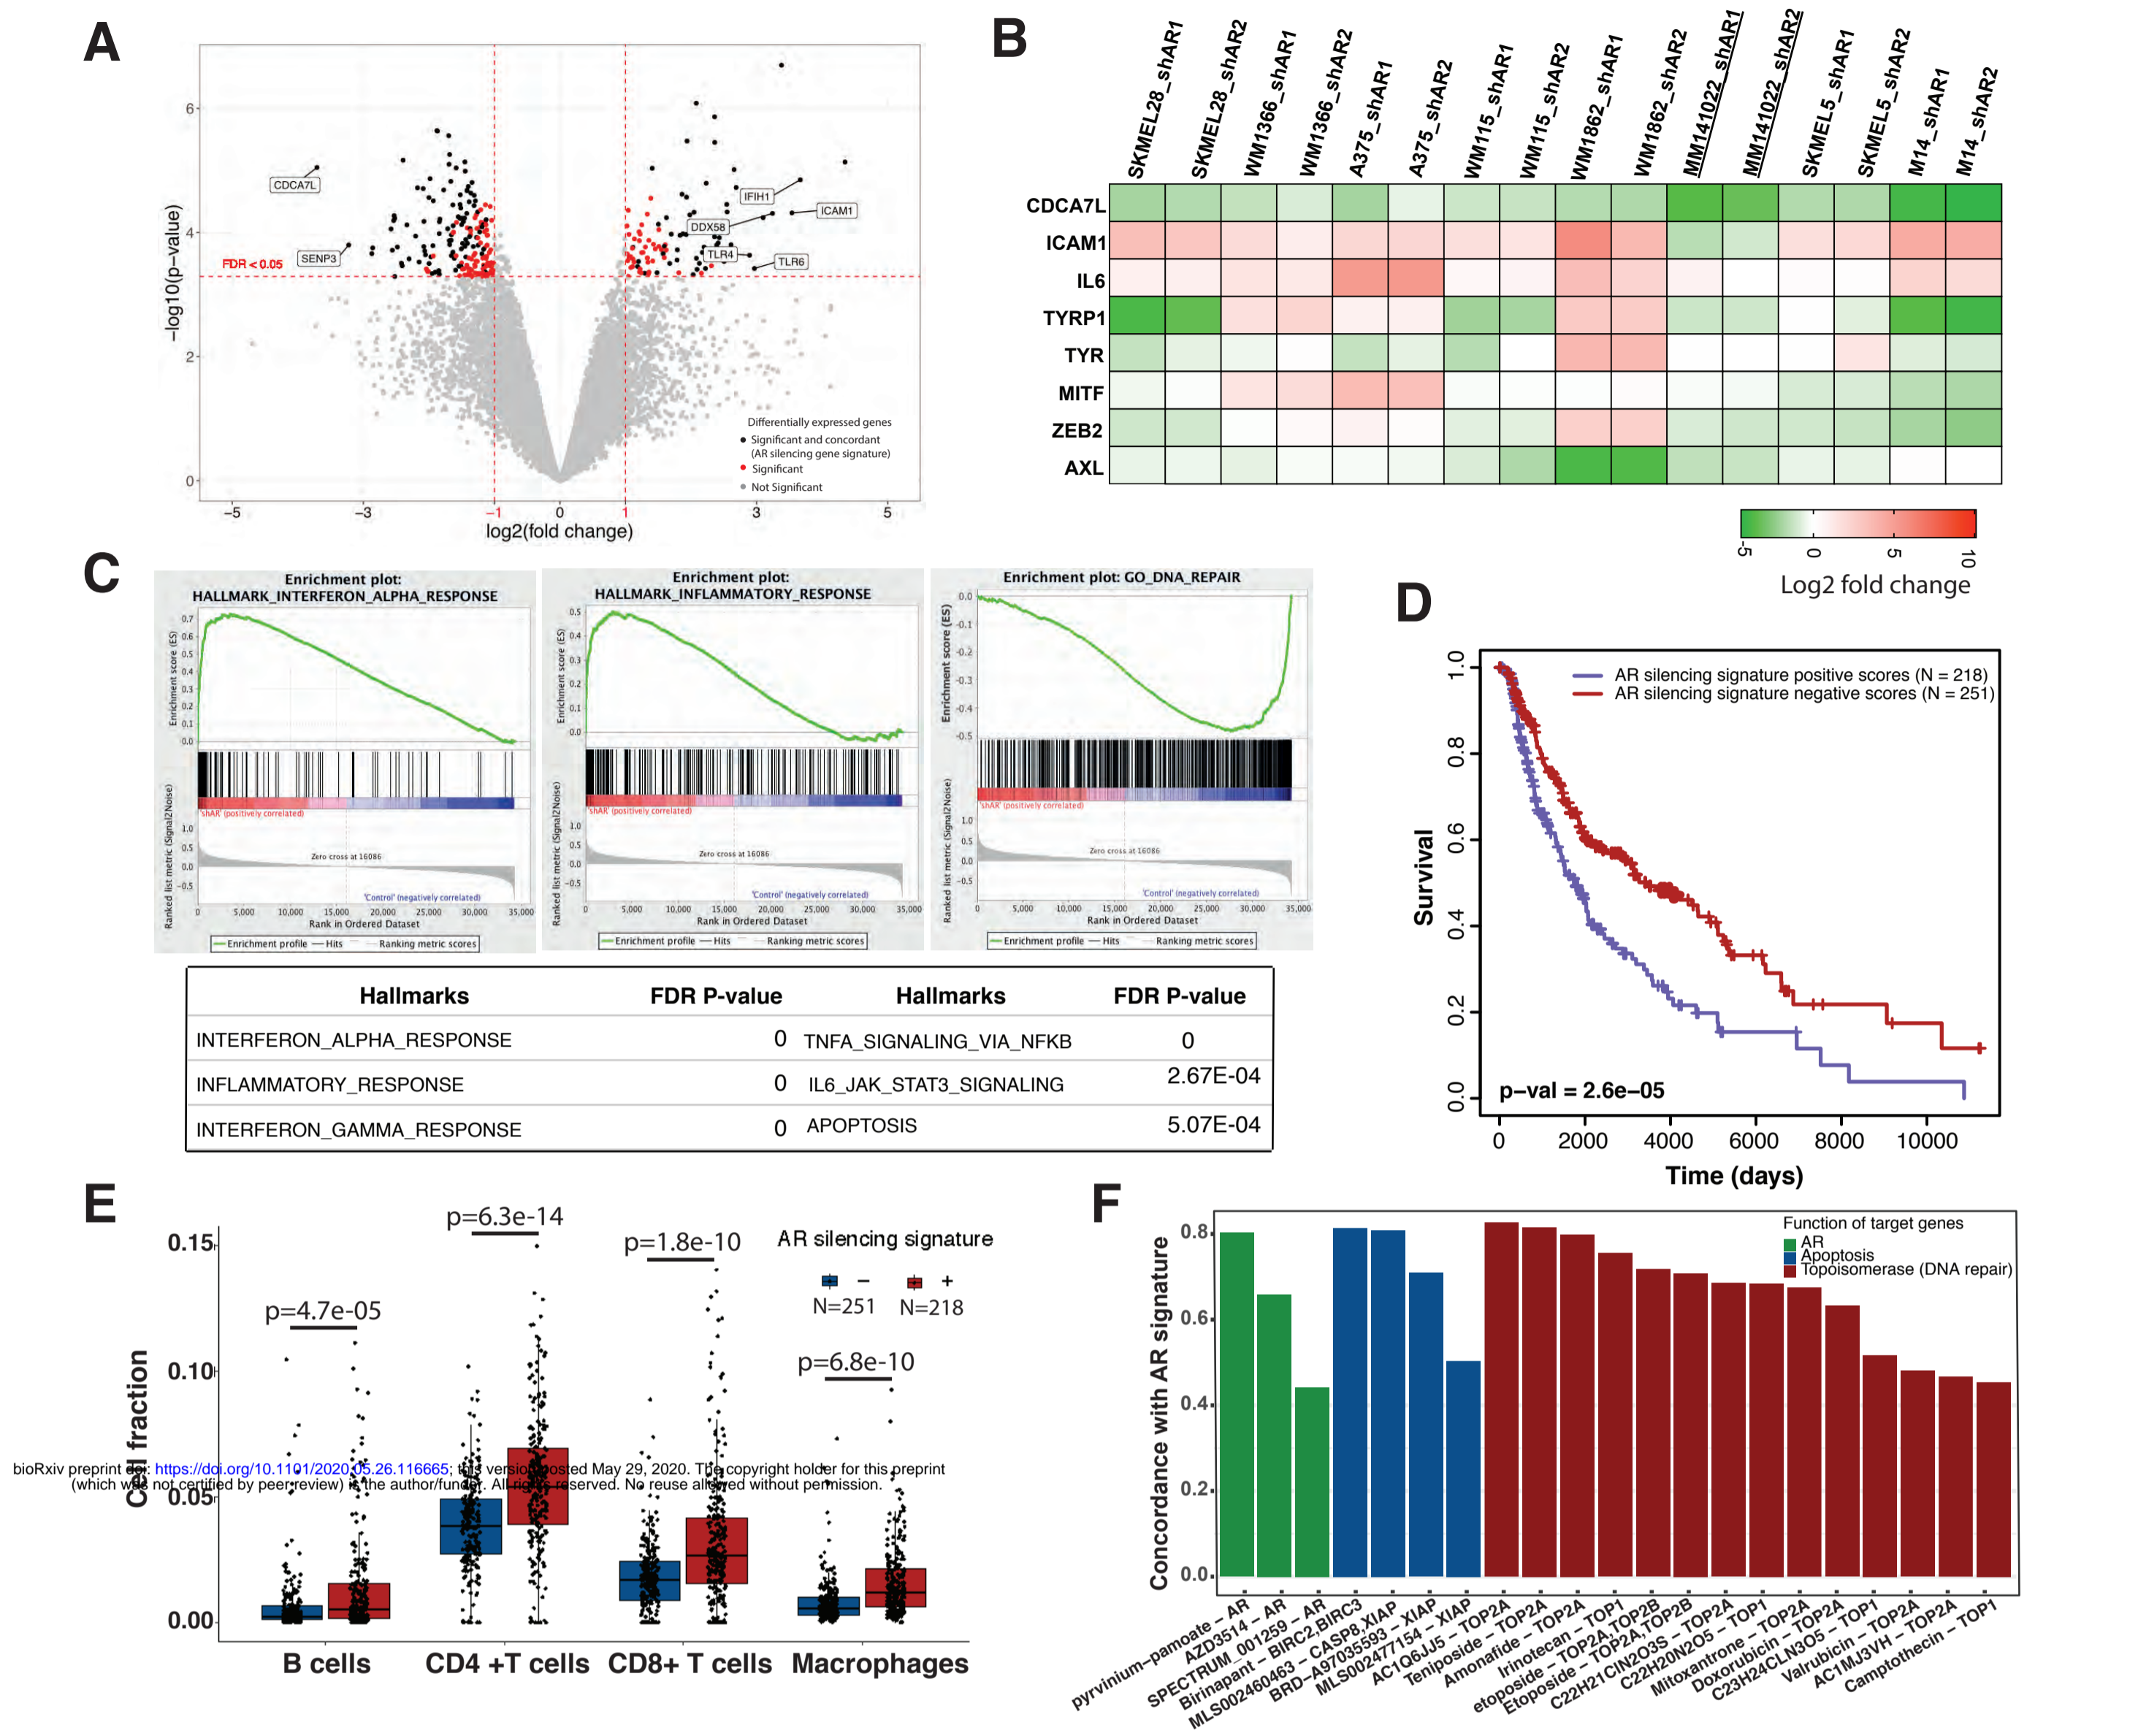

**Figure 4. Global analysis of AR-regulated genes in melanoma cells and clinical relevance.**

**A)** Volcano plot showing the shared transcriptional changes elicited by AR silencing in WM1366, SKMEL28 and WM115 melanoma cells plus/minus AR-silencing by two different lentiviruses versus empty vector control. Cells were analyzed 5 days after infection by Clariom™ D array hybridization. The x-axis shows the log<sub>2</sub> fold-change between the two conditions, the y-axis shows the -log<sub>10</sub> (p-value). A False Discovery Rate (FDR) threshold of 0.05 and fold change thresholds of -1 and 1 are indicated by dashed red lines. Each dot represents one gene. Grey and red dots correspond to genes not significantly or non-concordantly modulated in the three melanoma lines, respectively. Black dots show genes above thresholds that are concordantly up- or down- regulated in all three cell lines and compose the AR silencing gene signature utilized for further analysis. A few selected genes among the most significantly differentially expressed ones are indicated. The list of 155 genes associated with AR silencing gene signature is provided in Supplementary Table 3. **B)** Expression of the indicated genes in multiple melanoma cell lines plus/minus AR silencing by two different lentiviruses versus empty vector control. RT-qPCR results after RPLP0 normalization are shown as a heat map of ratios of gene expression (folds of down- or up-regulation in green and red, respectively). Individual gene expression profiles (with most analyses based on two independent experiments) are shown in Supplementary Fig. S13. **C)** Gene set enrichment analysis (GSEA) of the common gene expression profiles elicited by AR gene silencing in WM1366, SKMEL28 and WM115 melanoma cells (Supplementary Table 3) versus a predefined set of gene signatures related to various processes and signaling pathways (Broad Institute, <http://software.broadinstitute.org/gsea/msigdb/collections.jsp#H>). Top: GSEA plot distribution of gene signatures related to interferon alpha, inflammatory response and DNA repair pathways. Genes are ranked by signal-to-noise ratio based on their differential expression in AR-silenced versus control melanoma cells; position of genes in the respective hallmark gene sets is indicated by black vertical bars, and the enrichment score is shown in green. Bottom: relevant gene sets most significantly associated with AR silencing gene signature are indicated together with the corresponding FDR-q values. The full list of significantly associated gene signatures is provided in Supplementary Table 4. **D)** Association of the AR silencing gene signature in melanoma cells - as obtained in panel A - with patients' survival in TCGA Skin Cutaneous Melanoma (SKCM) dataset. Signature scores for each patient were computed from RNA-seq data with GSVA R package (40), with Kaplan-Meier curves showing that melanomas with positive scores for the AR silencing signature (red, N = 251) are significantly associated with better survival than the ones with negative scores, (blue, N = 218), p-value = 2.6e-05, log-rank test. **E)** Fraction of tumor-infiltrating immune cells estimated by EPIC R package analysis of TCGA Skin Cutaneous Melanoma (SKCM) dataset, using default reference profile in tumors positive and negative for the AR silencing signature (red and blue boxplots respectively). Cell fractions for B cells, CD4+ T cells, CD8+ T cells and macrophages are reported (each dot representing one tumor). Outliers with cell fraction greater than 0.15 are not shown. EPIC association plots for all other cell types are shown in Supplementary Figure 14A together with the enrichment scores of signature matrix associated with 22 different immune cell types determined by CIBERSORTx (Supplementary Figure 14B). **F)** Bar plot reporting the concordance between the melanoma AR silencing gene signature and iLINCS expression profiles of A375 cells treated with compounds targeting AR (green), apoptosis-related proteins (BIRC2, BIRC3, XIAP, blue) and topoisomerases (TOP1, TOP2A, red). Perturbagens of each class are sorted by concordance (p < 0.0001) and the names of the chemical compounds are reported on the x axis along with their molecular targets. If multiple signatures were available for the same perturbagen (e.g. by varying concentration or time), only the signature with the highest concordance was shown. A list of compounds eliciting gene expression profiles with concordance coefficient > 0.6 with AR silencing signature is reported in Supplementary Table 5.

# Figure 5

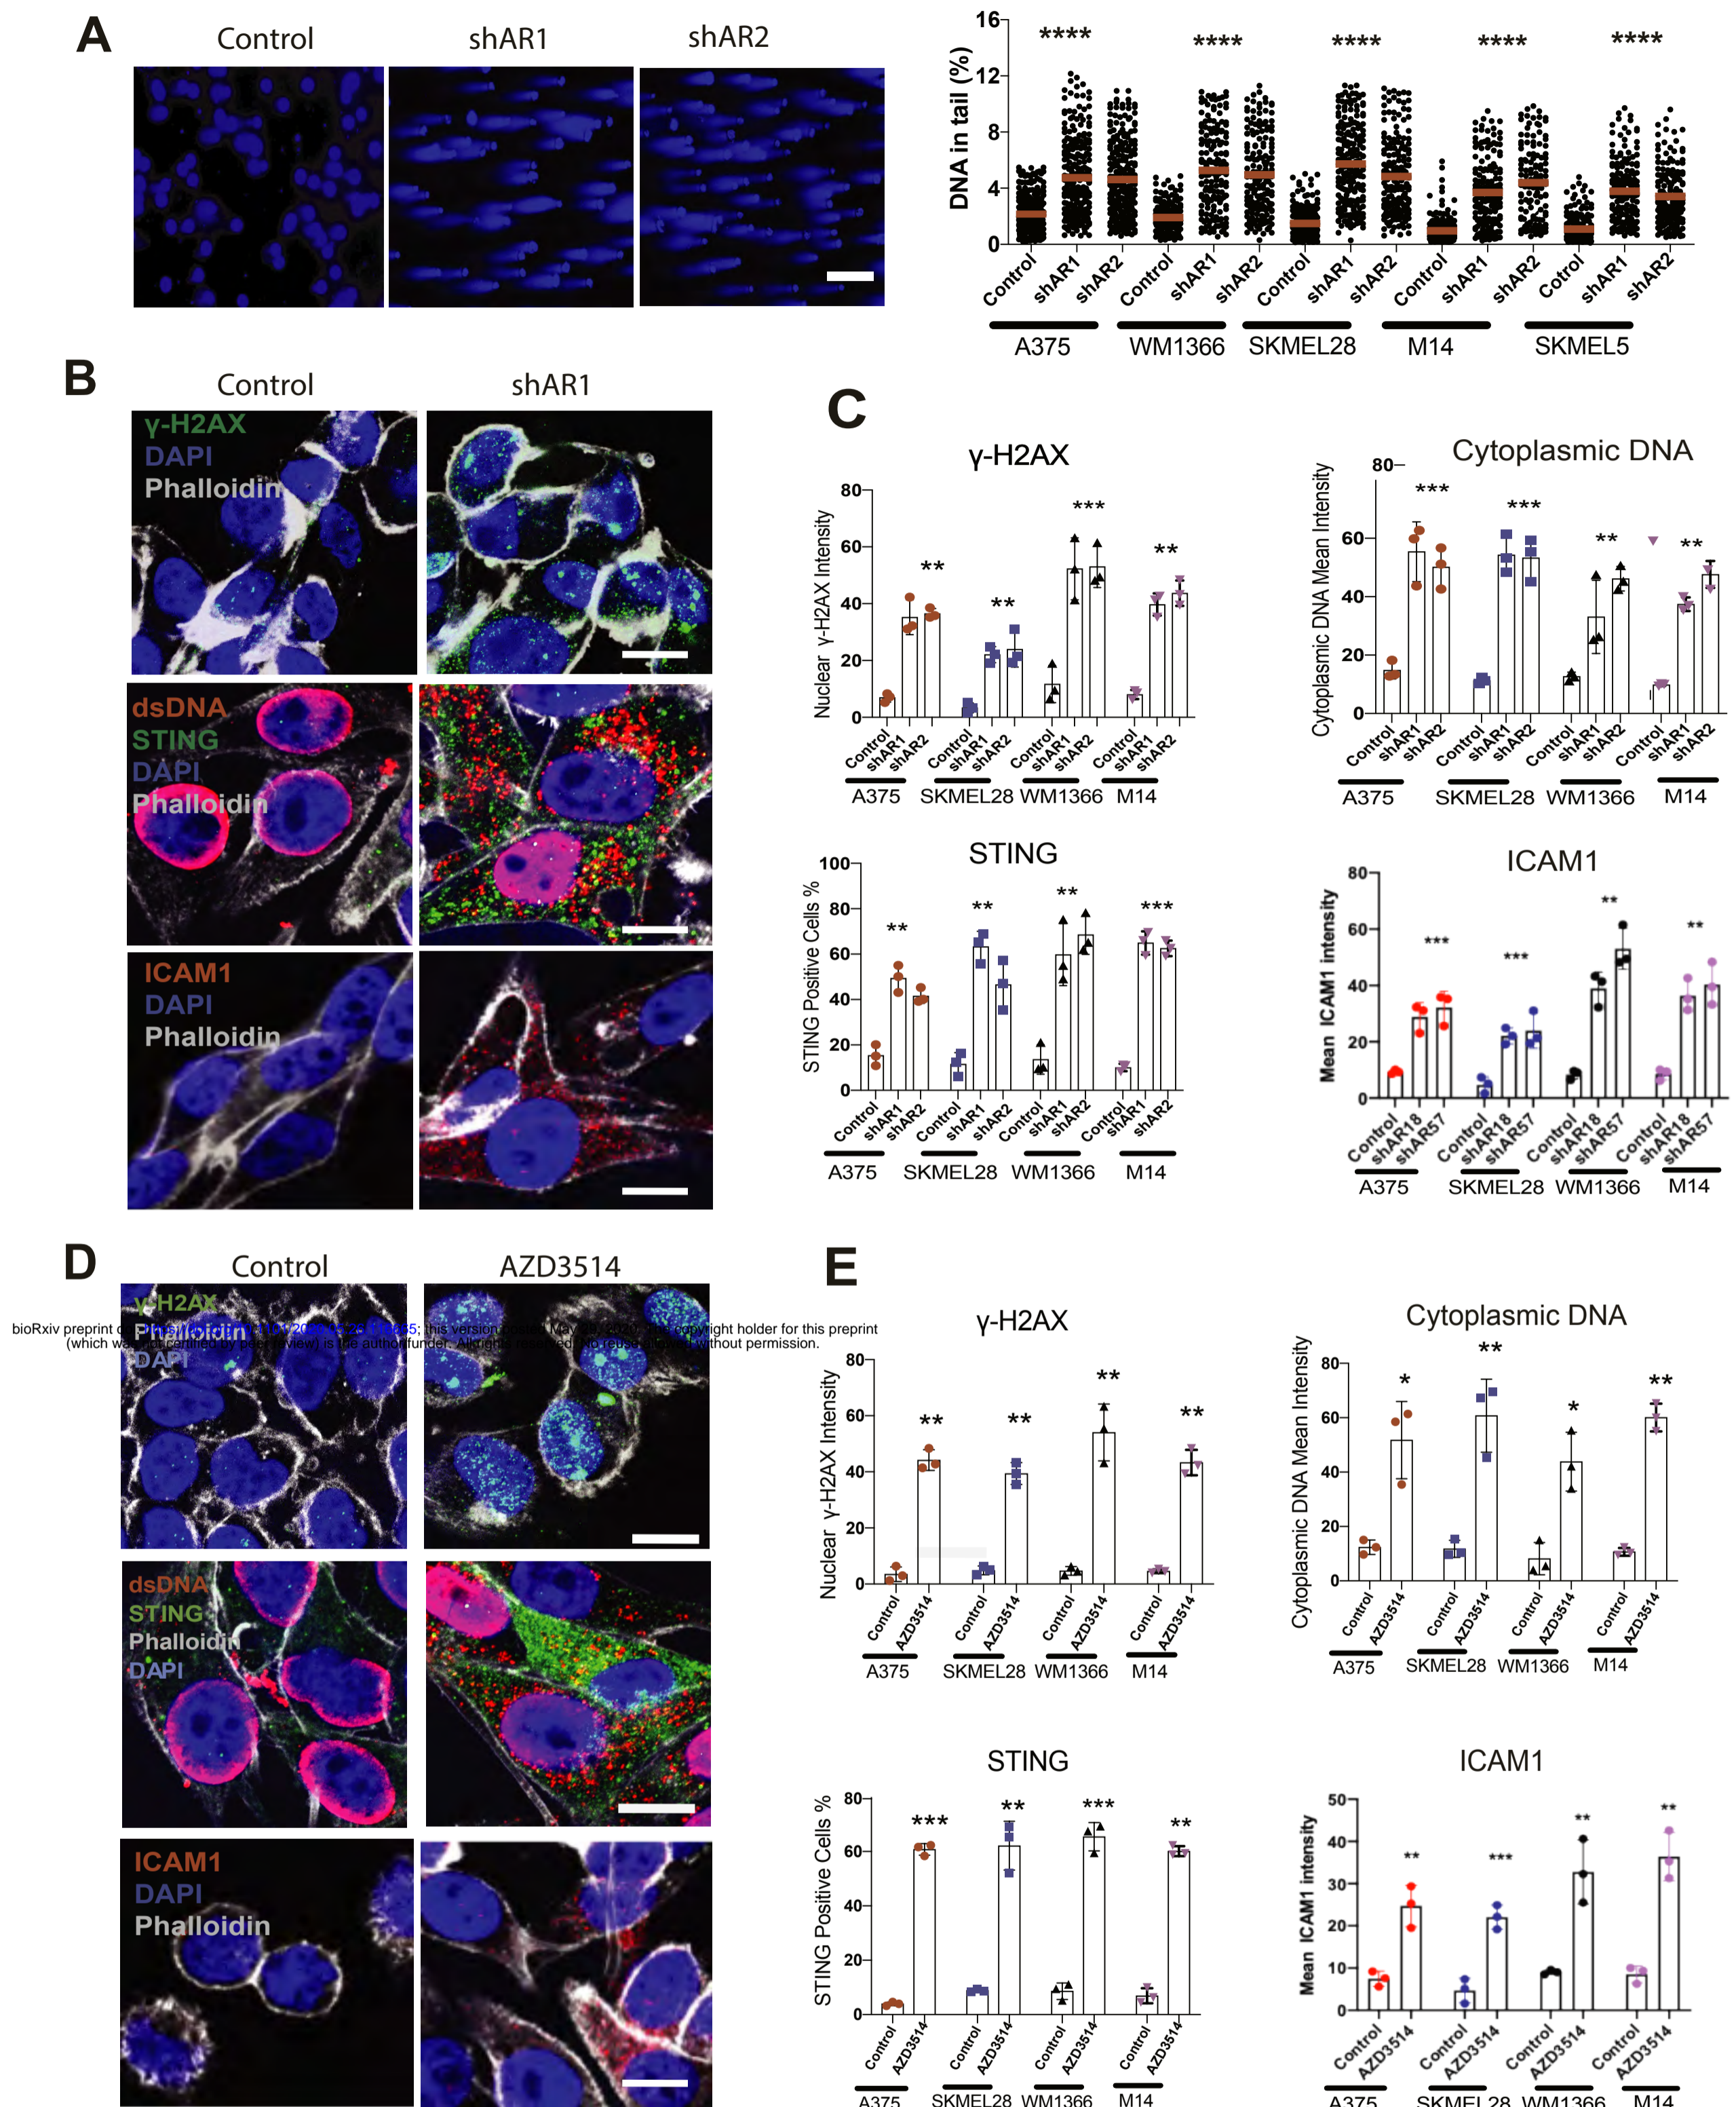

**Figure 5. Loss of AR function induces DNA breakage, cytoplasmic dsDNA leakage and STING activation.**

**A**) Comet assays of multiple melanoma cell lines plus/minus shRNA-mediated AR silencing (5 days after infection). Shown are representative images of WM1366 melanoma cells together with quantification of % tail DNA (calculated by Comet Score 1.6.1.13 software, [www.rexhooover.com](http://www.rexhooover.com)) in five different melanoma cell lines. Scale bar: 10  $\mu$ m. n (number of cells) = 125; one-way ANOVA; \*\*\*\*p < 0.001. **B, C**) Double immunofluorescence image analysis of a panel of melanoma cell lines plus/minus shRNA-mediated AR silencing (5 days after infection). **B**) representative images of WM1366 stained with antibodies against  $\gamma$ -H2AX (green) and Phalloidin (gray) for cell border identification (upper panel), and dsDNA (red) and STING (green) (middle panel) and ICAM1 (red) (lower panels). Scale bar: 10  $\mu$ m. **C**) quantification of nuclear  $\gamma$ -H2AX, cytoplasmic DNA, ICAM1 immunofluorescence signal intensity and percentage of STING positive cells in the indicated panel of melanoma cell lines plus/minus AR silencing. > 100 cells were counted in each condition. Results are expressed as mean  $\pm$  SD. n (number of experiments) = 3; 1-way ANOVA with Dunnett's test, \*\* P < 0.01, \*\*\* P < 0.005. **D, E**) Double immunofluorescence image analysis of a panel of melanoma cells treated with AZD3514 (10  $\mu$ M) versus DMSO control for 2 days. Shown are representative images (**D**) and quantification (**E**) of the results as in the previous panel. n (number of experiments) = 3; two-tailed paired t-test, \*P < 0.05; \*\* P < 0.01, \*\*\* P < 0.005.

# Figure 6

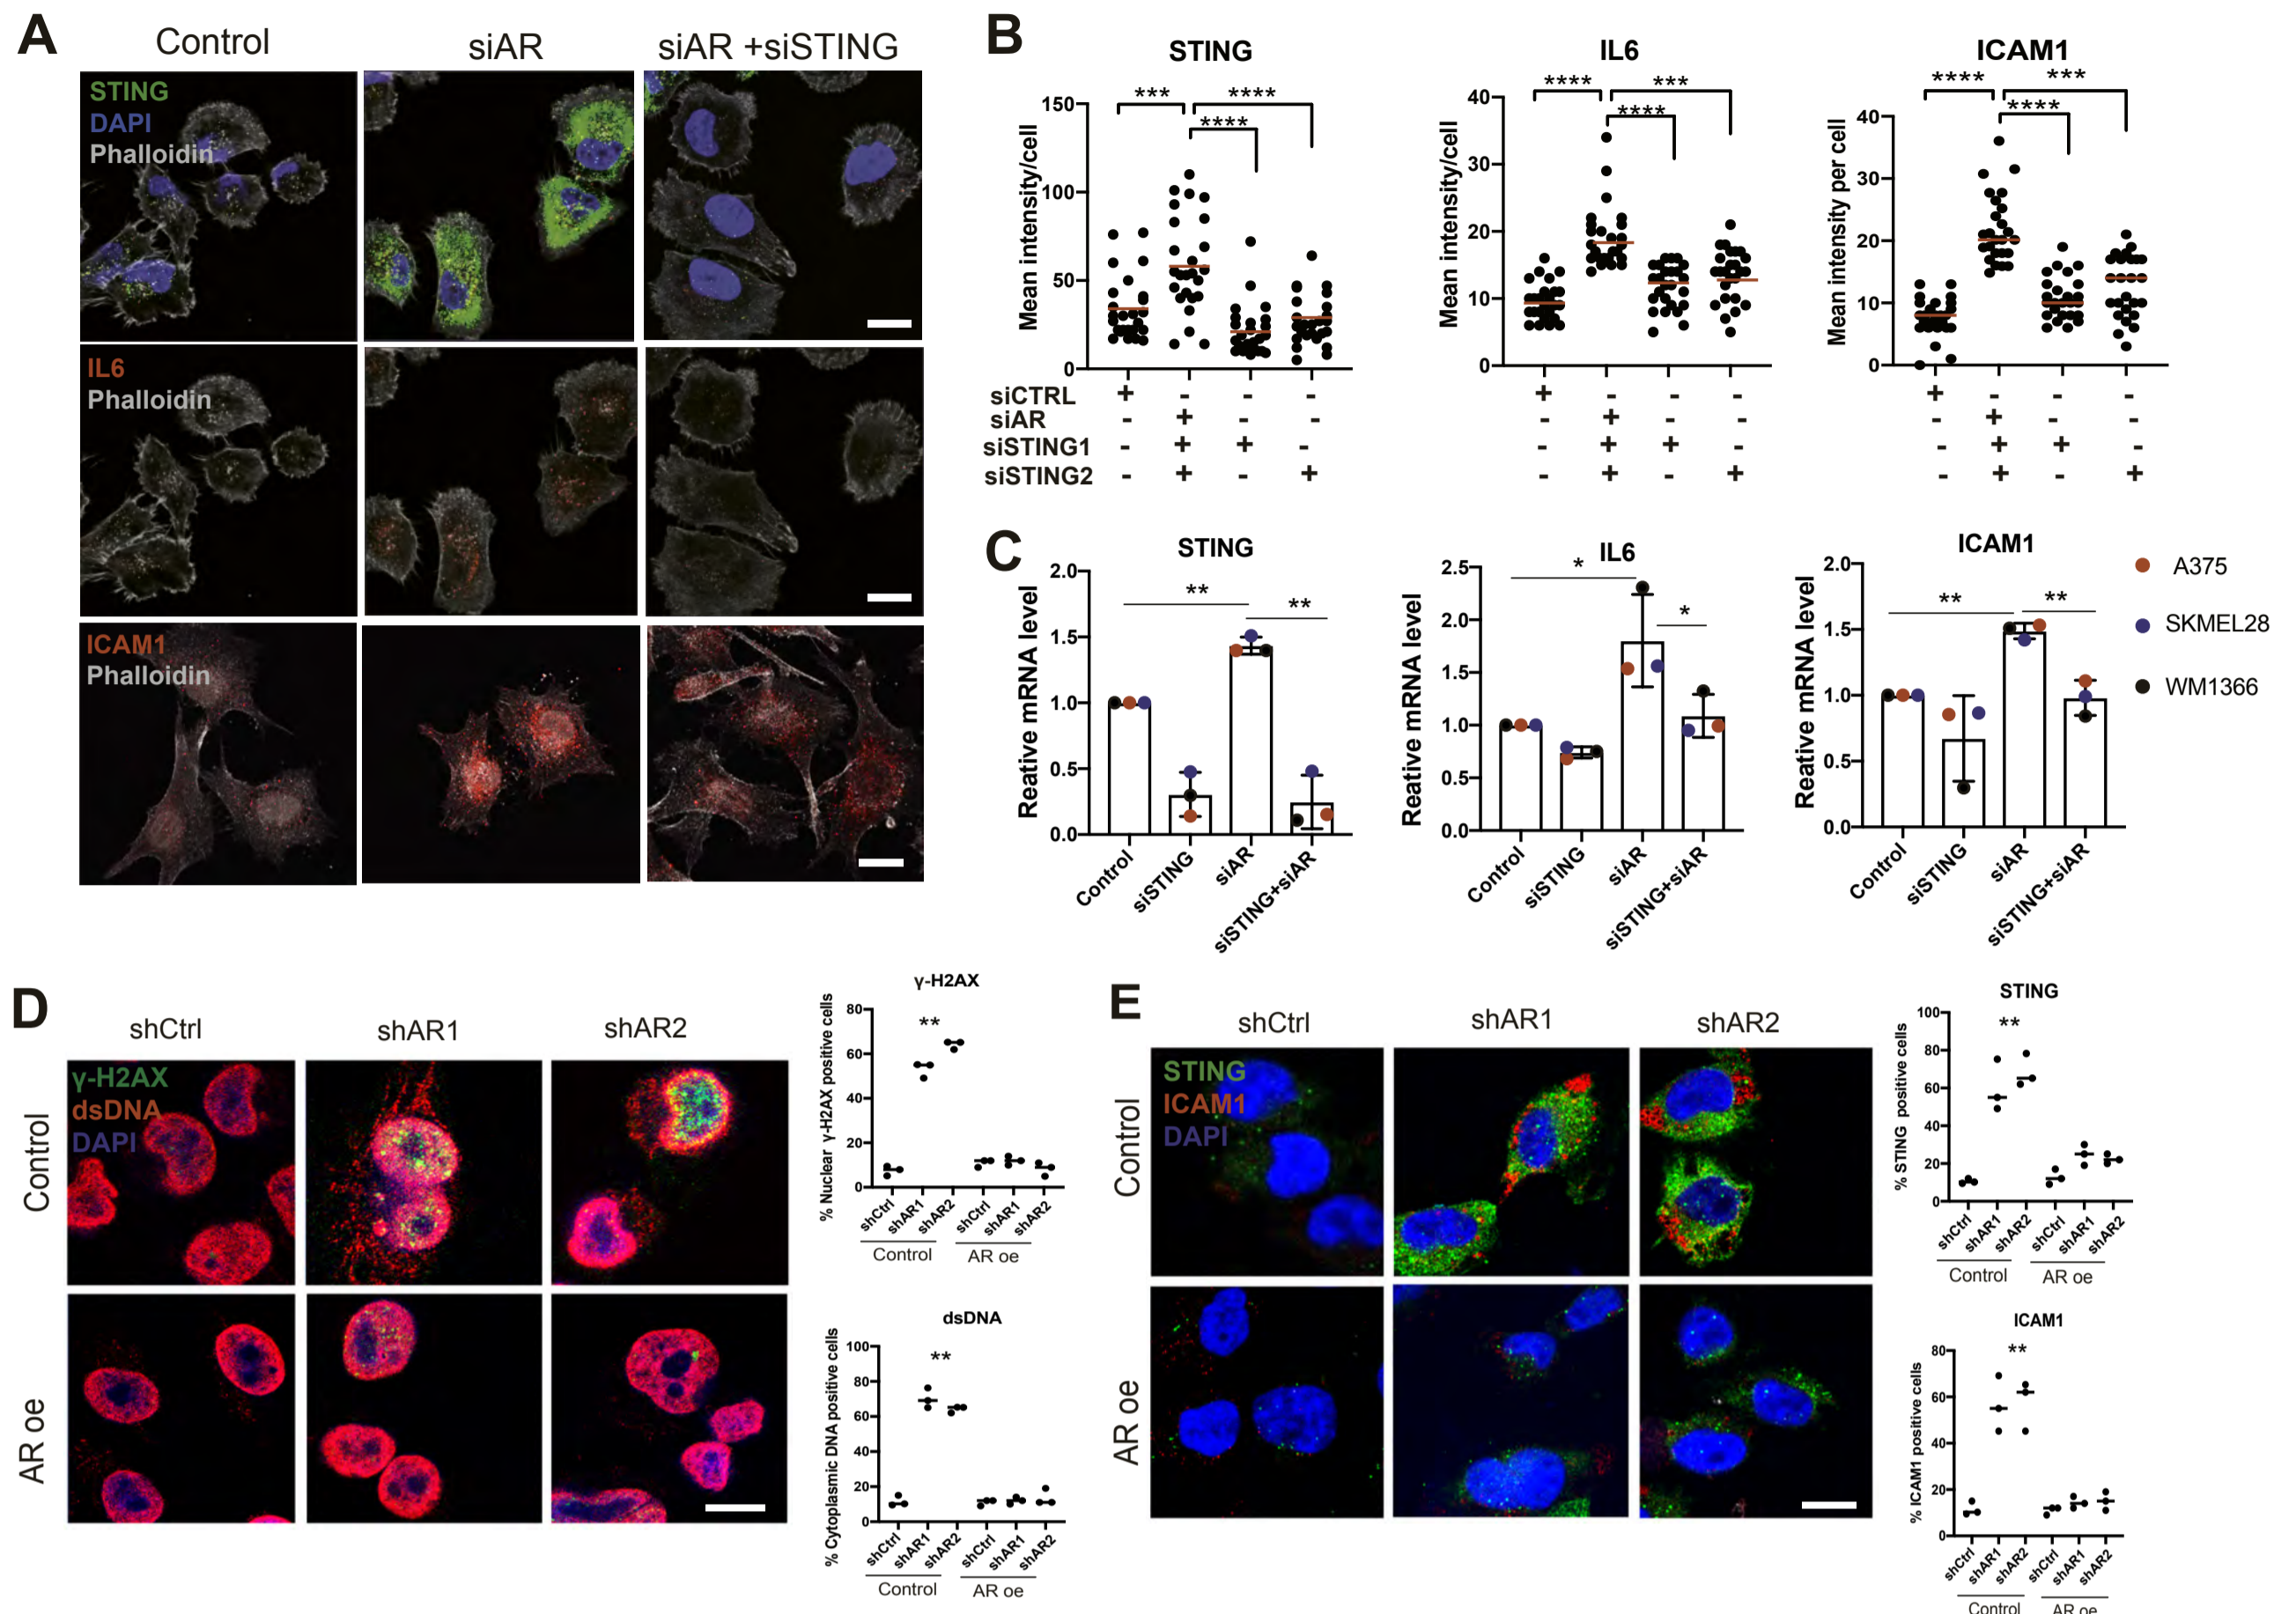

bioRxiv preprint doi: <https://doi.org/10.1101/2020.05.26.116665>; this version posted May 29, 2020. The copyright holder for this preprint (which was not certified by peer review) is the author/funder. All rights reserved. No reuse allowed without permission.

## Figure 6. Loss of AR function induces STING-dependent gene expression.

**A, B** Counteracting impact of AR and STING gene silencing on IL6 and ICAM1 expression. Double immunofluorescence analysis of WM1366 melanoma cells transfected with STING and/or AR silencing siRNAs versus scrambled controls, with antibodies against STING (upper panel, green), IL6 and ICAM1 (middle and lower panels, red) with phalloidin staining for cell border delimitation (gray). Shown are representative images (A) and quantification (B) of STING, IL6 and ICAM1 fluorescence signal intensity per cell, 48 h after transfection. Each dot corresponds to mean fluorescence intensity per cell. n (number of cells) = 25; paired t-test, \*\*\*P < 0.005, \*\*\*\*P < 0.001. Scale bar: 10 μm. **C** RT-qPCR analysis of STING, IL6 and ICAM1 mRNA expression in the indicated melanoma cell lines 48 h after transfection with STING and/or AR silencing siRNAs versus scrambled controls. Each bar corresponds to mean expression levels per melanoma cell line. Data are represented as mean ± SD. n (number of strains) = 3; 1-way ANOVA with Dunnett's test, \*P < 0.05, \*\*P < 0.01. **D** Representative double IF images and quantification of γ-H2AX expression (green) and cytoplasmic dsDNA (red) leakage in A375 cells stably infected with an AR-overexpressing (AR oe) or control lentivirus and super-infected with two AR silencing lentiviruses versus control. Scale bar: 10 μm. Data are from triplicate experiments; each dot represents one experiment. n (number of experiments) = 3; 1-way ANOVA with Dunnett's test, \*\* P < 0.01. **E** representative double IF images and quantification of STING (green) and ICAM1 (red) expression in A375 cells plus/minus AR overexpression and silencing as in the previous panel. n (independent experiments) = 3; 1-way ANOVA with Dunnett's test, \*\* P < 0.01.



# Figure 7

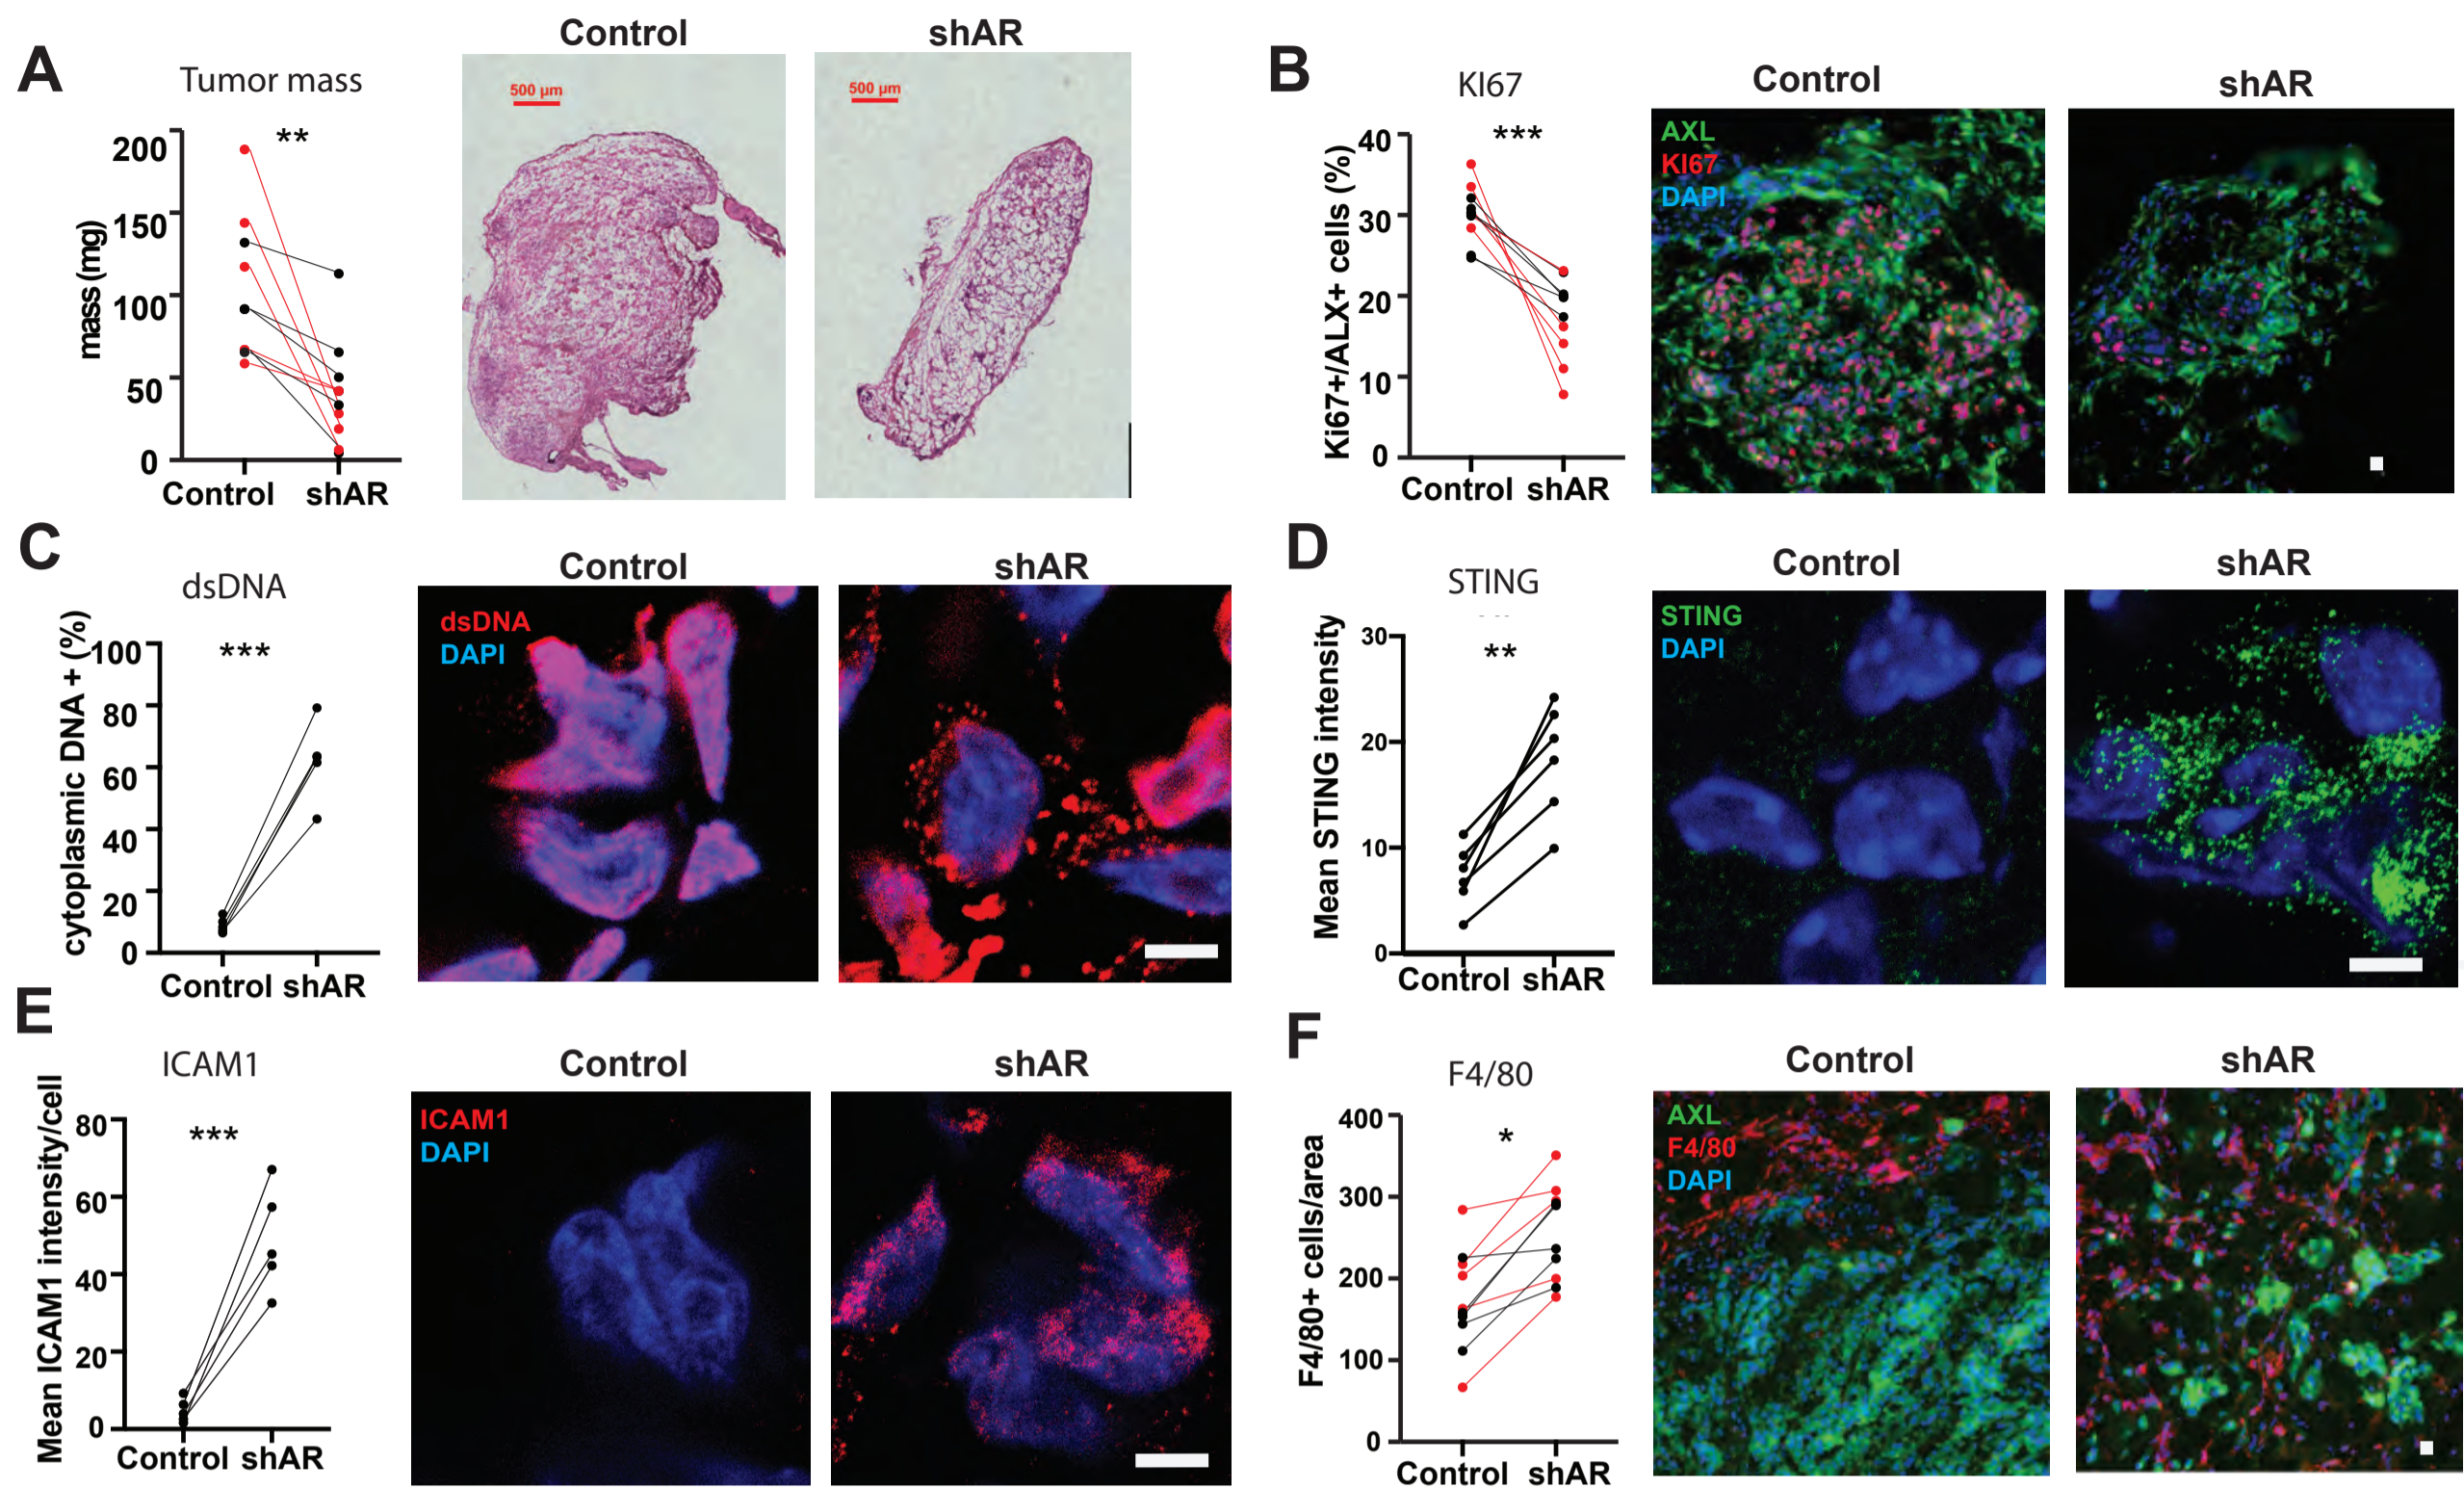

## Figure 7. Suppression of melanoma formation by AR silencing.

WM1366 melanoma cells infected with an AR-silencing lentivirus versus vector control were tested by parallel intradermal Matrigel injections into NOD/SCID male and female mice (5 per group, data of male mice in red). Mice were sacrificed 16 days after injection.

**A)** Tumor size measured by digital caliper (mass = (length x width x height) \*  $\pi/6$ ) together with representative low magnification H/E images of the retrieved lesions. **B-E)** Double immunofluorescence analysis of lesions with antibodies against AXL, for melanoma cells identification, and quantification of KI67 (B) or cytoplasmic dsDNA (C) positive cells, and mean fluorescence signal intensity of STING (D) and ICAM1 expression (E). Shown are representative images of AXL positive cells (AXL signal not shown) stained with antibodies against the other markers, together with relative quantification, (> 50 cells in 3-5 fields on digitally-retrieved images were counted using ImageJ software). **F)** double immunofluorescence analysis of lesions with antibodies against AXL and F4/80, for melanoma cells and macrophages identification, respectively. Shown are representative images together with quantification of the number of F4/80 positive cells per AXL positive tumor area, counting in each case 3-4 fields. Similar determination of CD45 positive cells is shown in Supplementary Figure 15. n (control versus experimental lesions) = 10; two-tailed paired t test, \*P < 0.05; \*\* P < 0.01; \*\*\*P < 0.005. Scale bar: 10  $\mu$ m. Similar tumorigenicity experiments with A375 and SKMEL28 cells plus/minus shRNA-mediated AR silencing are shown in Supplementary Figure 16, 17.

# Figure 8

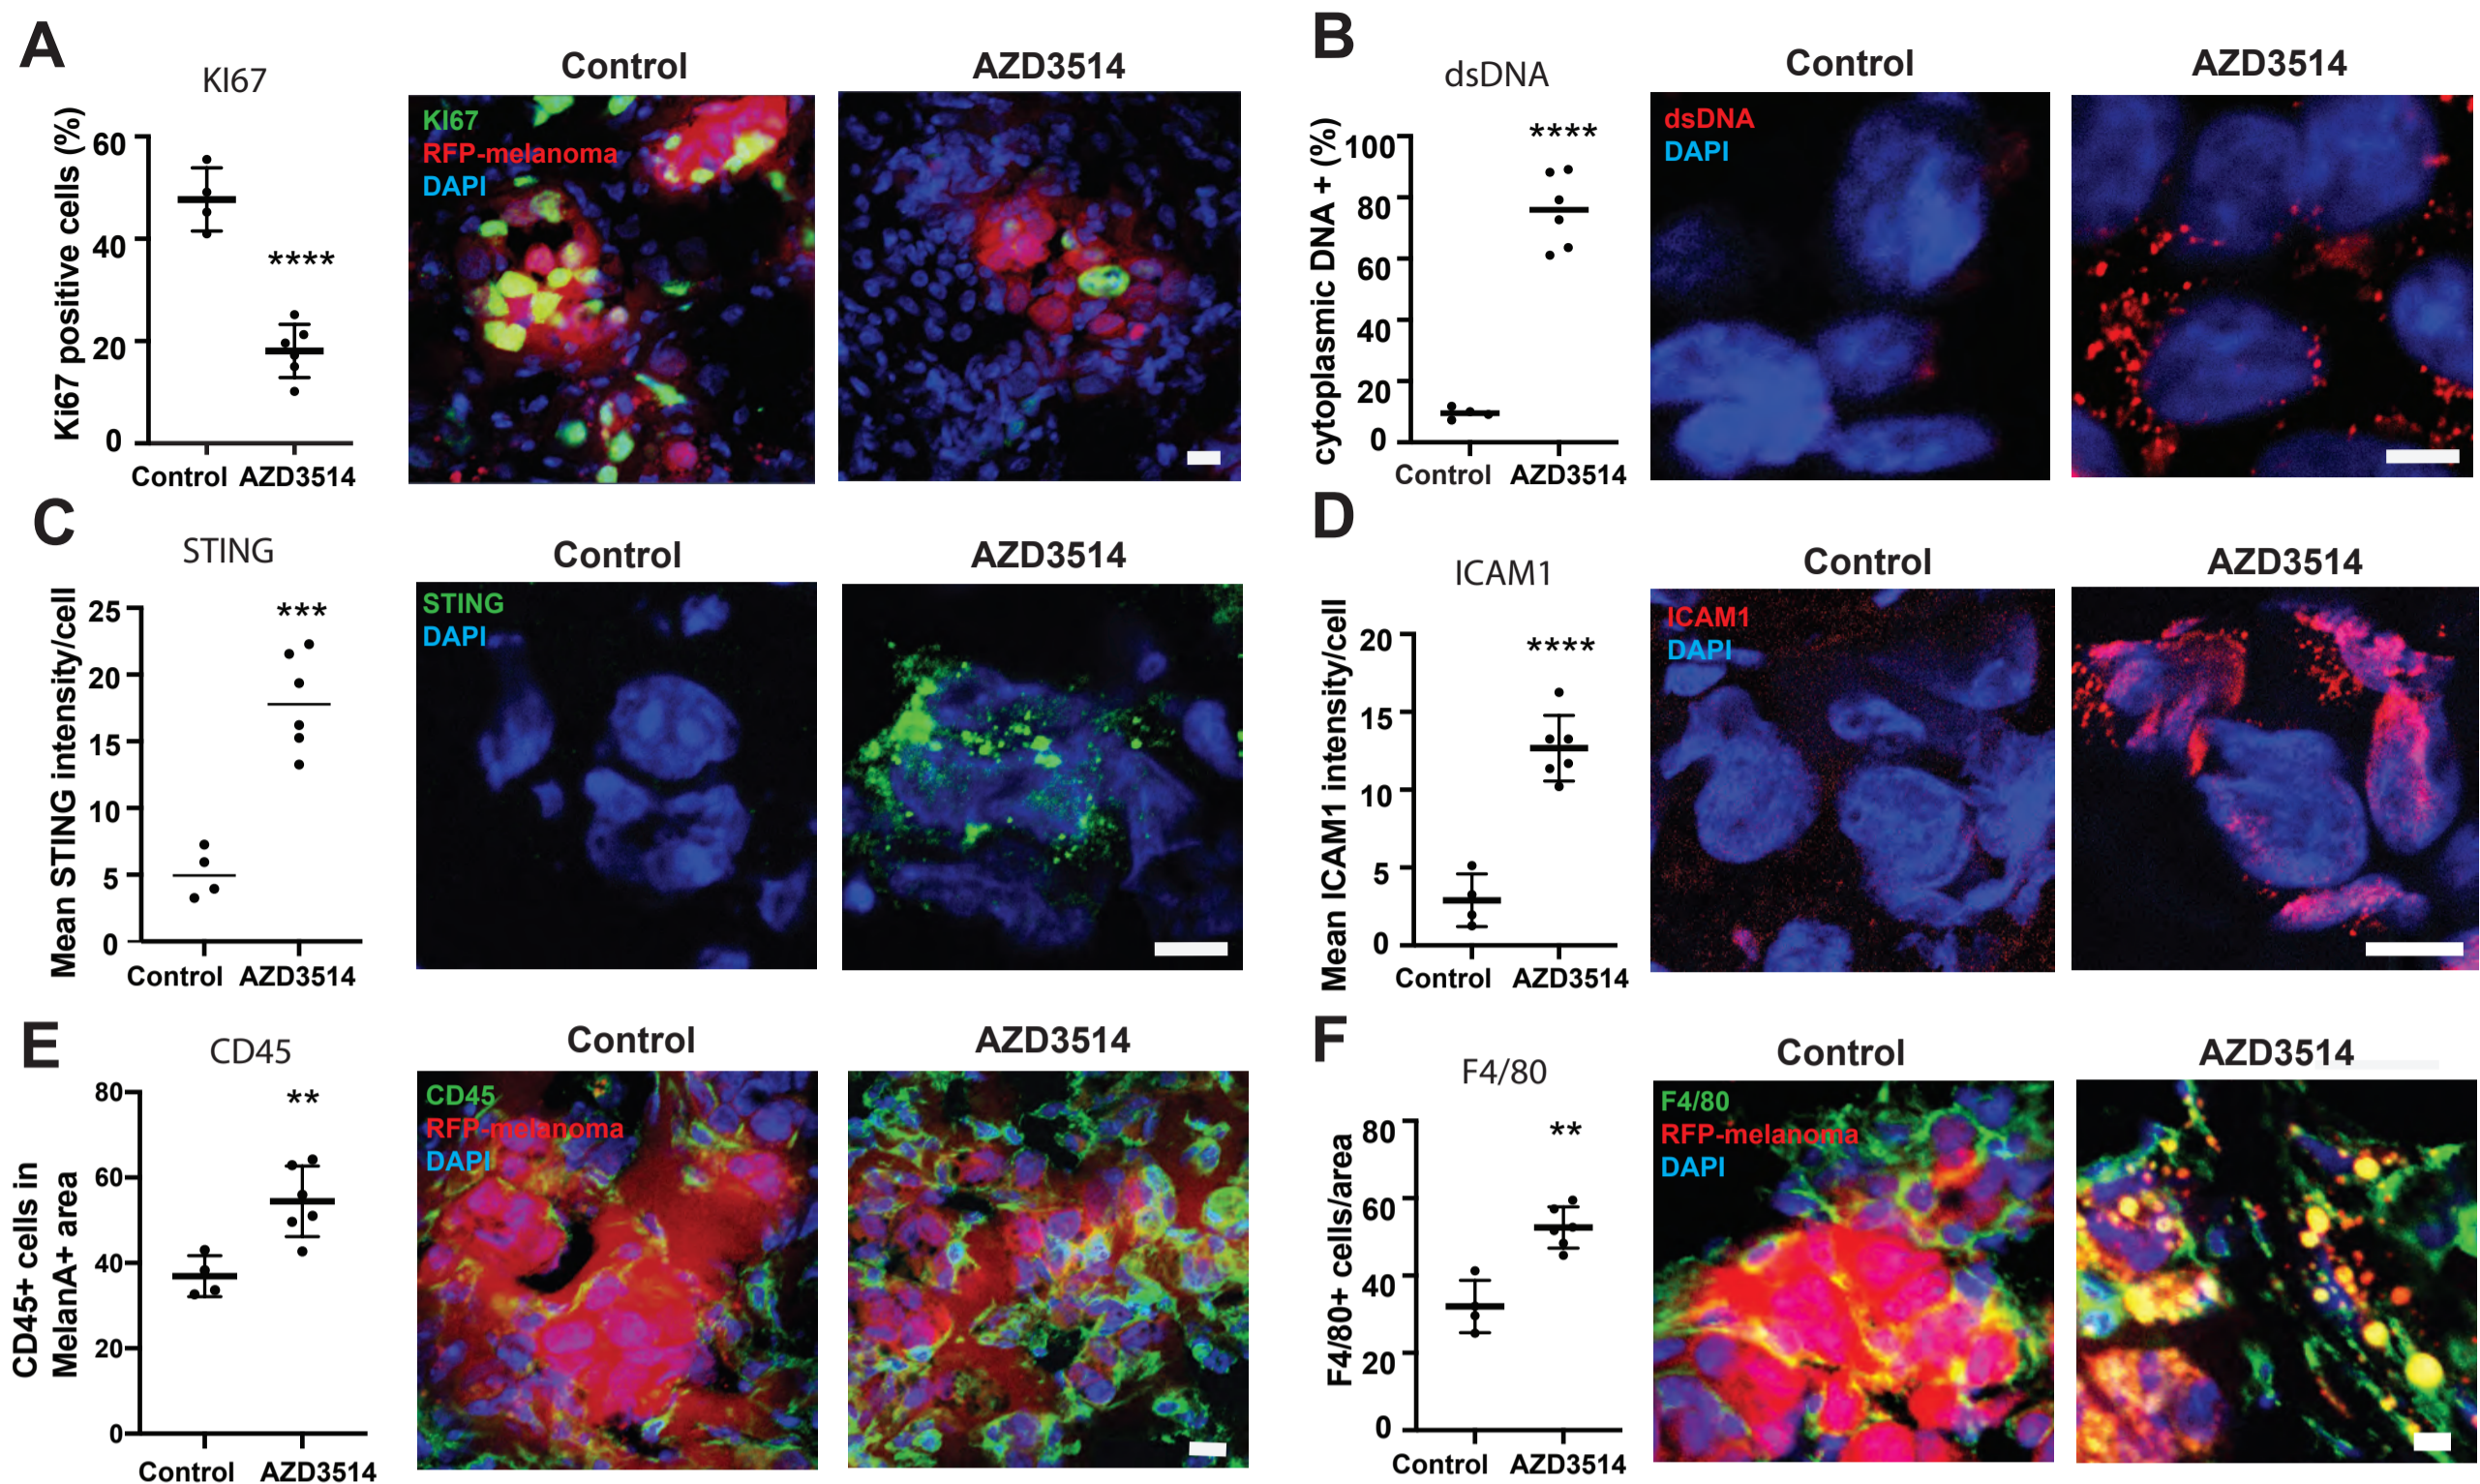

## Figure 8. Suppression of melanoma formation by AR inhibition.

RFP-expressing A375 melanoma cells were injected intradermally into 10 male mice. 3 days post-injection, mice were treated by oral gavage with either AZD3514 (50 mg/kg) or DMSO vehicle alone for 12 consecutive days. Immunofluorescence analysis was used to assess KI67 (A) and cytoplasmic dsDNA (B) positivity and STING (C) and ICAM1 (D) expression levels in melanoma cells (RFP-positive) together with numbers of juxtaposed leukocytes (E) and macrophages (F), as assessed by staining for the CD45 and F4/80 markers, respectively. Shown are quantifications together with representative images, including one (F) showing engulfment of fragmented RFP-positive melanoma cells into F4/80 positive macrophages in lesions of mice treated with the AZD3514 inhibitor. n (4 control versus 6 experimental lesions) = 10; unpaired t-test, \*\* P < 0.01; \*\*\*P < 0.005, \*\*\*\*P < 0.001. Scale bar: 10  $\mu$ m (A-F). Similar tumorigenicity experiments with injection of AZD3514 pretreated WM1366 cells are shown in Supplementary Figure 18.

# Figure 9

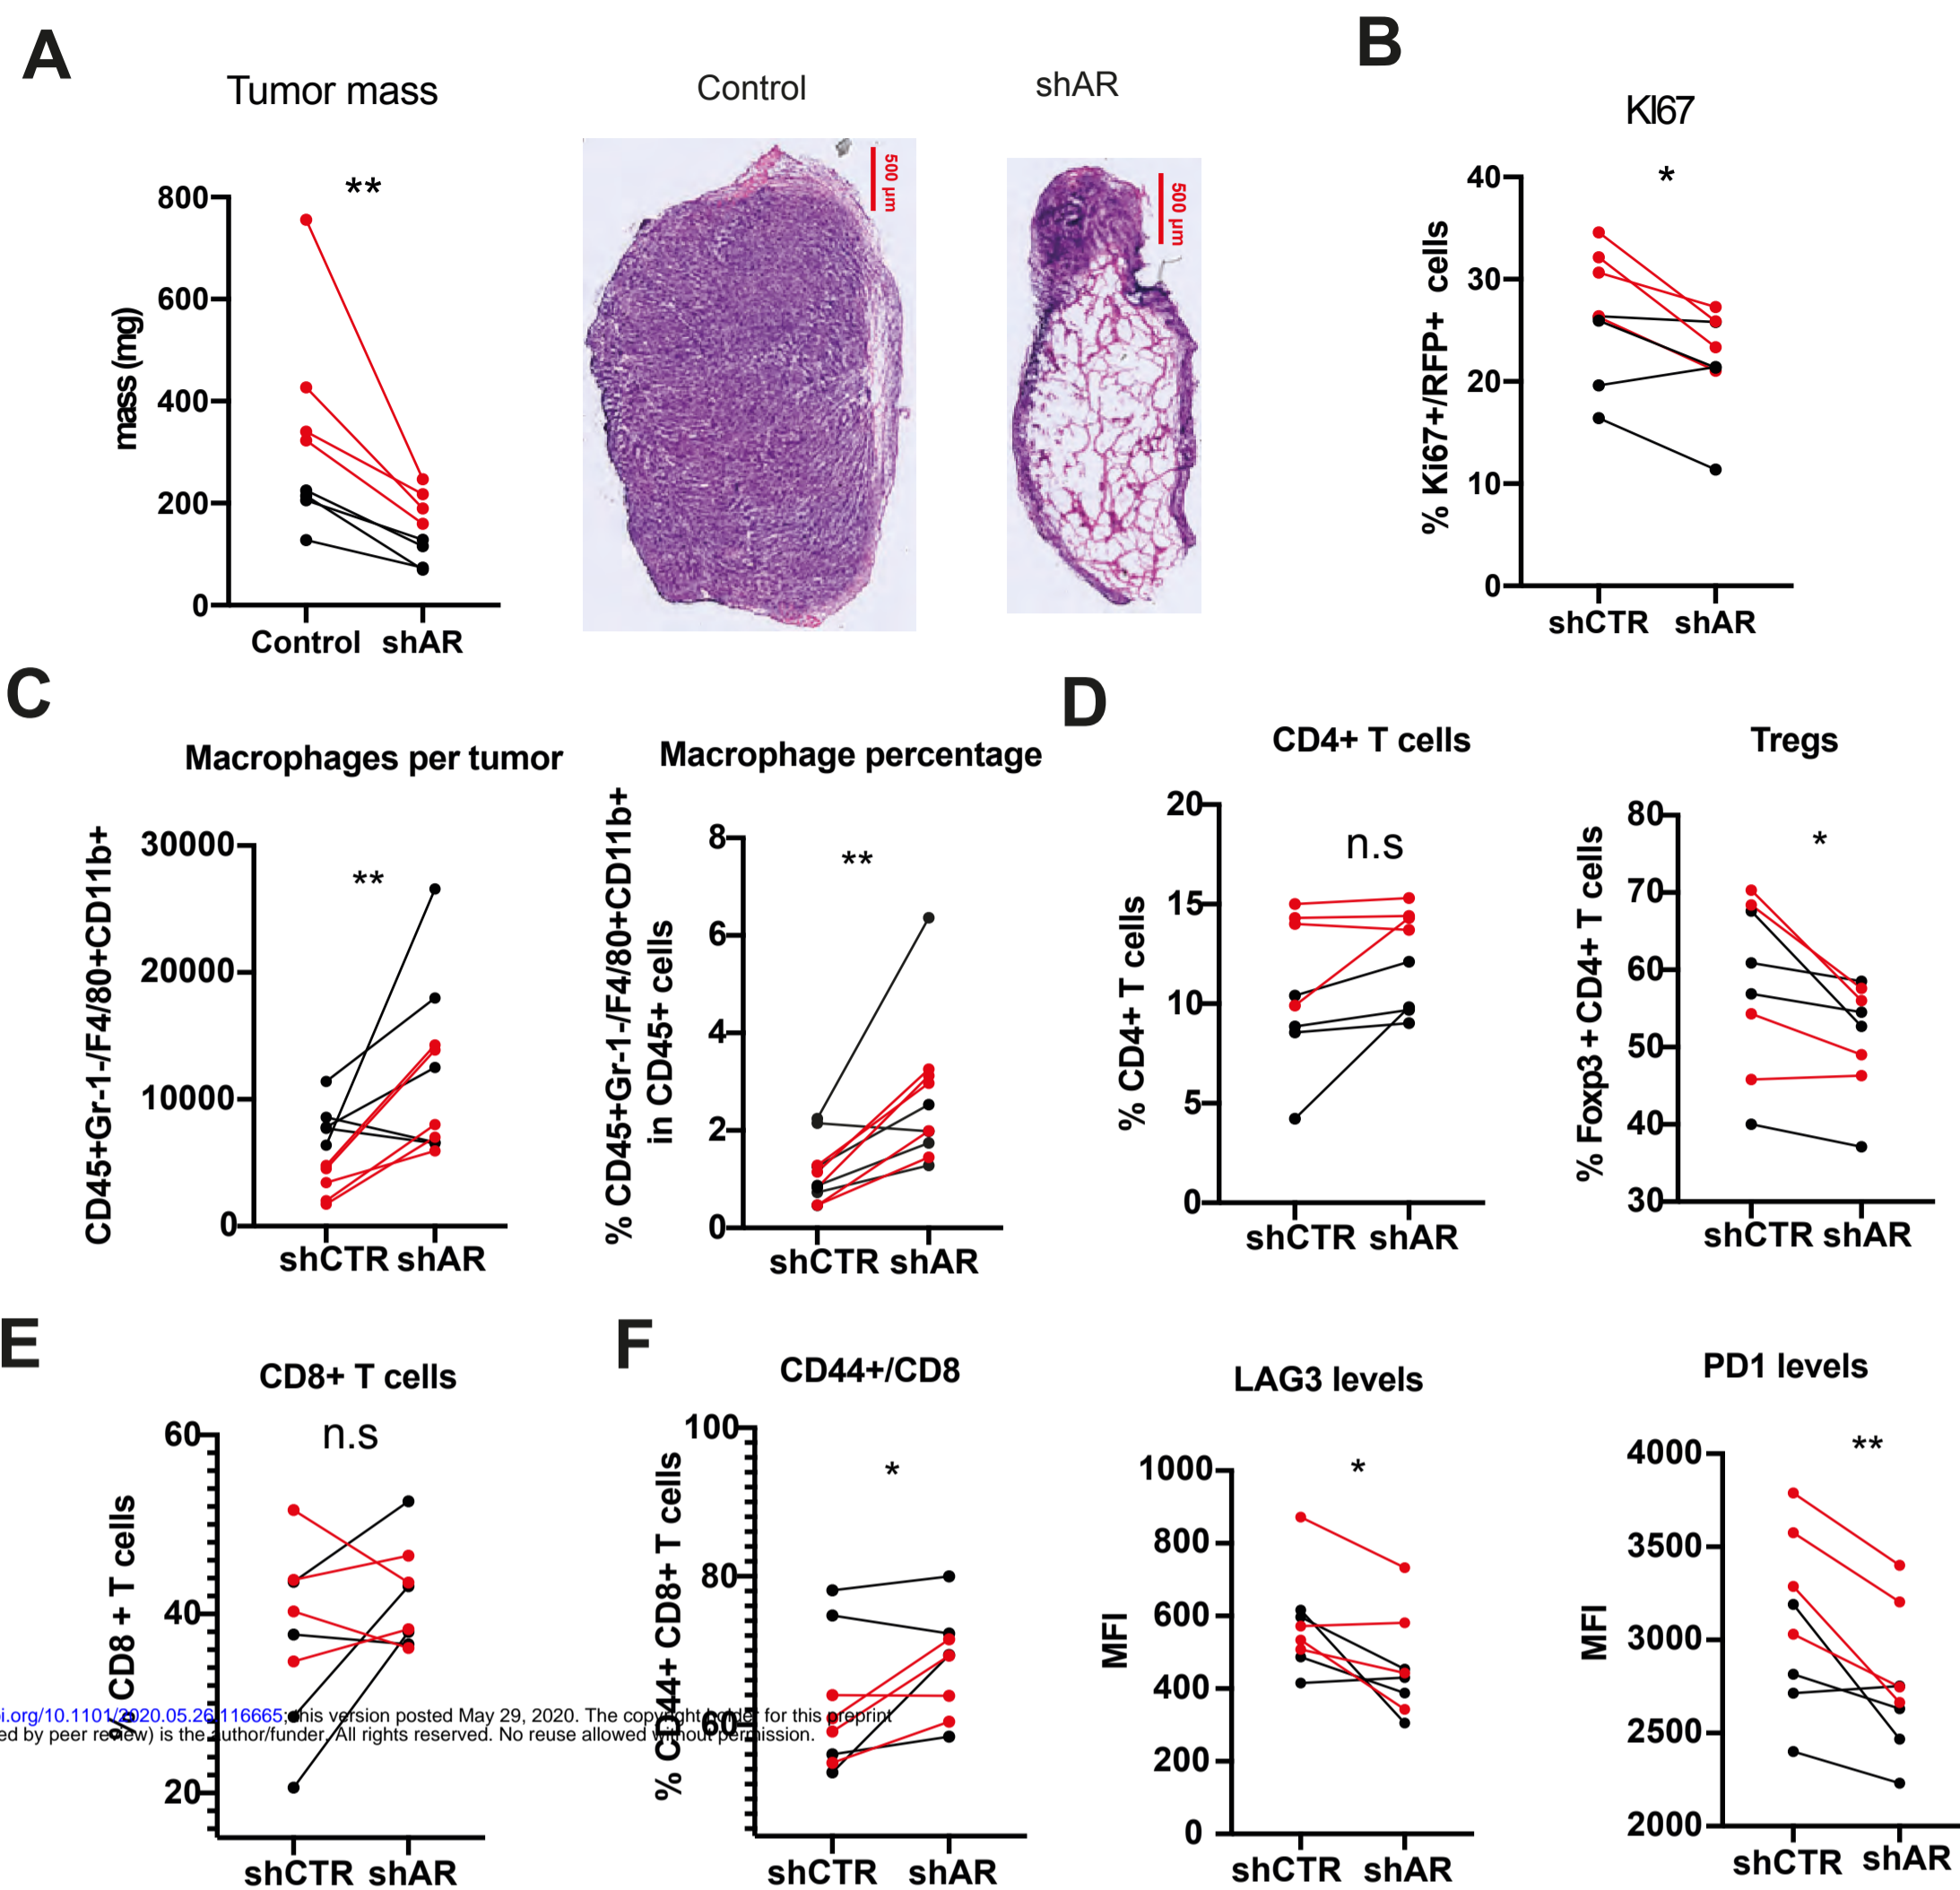

bioRxiv preprint doi: <https://doi.org/10.1101/2020.05.25.116665>; this version posted May 29, 2020. The copyright holder for this preprint (which was not certified by peer review) is the author/funder. All rights reserved. No reuse allowed without permission.

## Figure 9. Suppression of mouse melanoma formation and immune cells recruitment by AR gene silencing.

RFP-expressing YUMM1.7 mouse melanoma cells infected with an AR-silencing lentivirus versus vector control were tested by parallel intradermal Matrigel injections into BL6 male and female mice (4 per group, data of male mice in red). Mice were sacrificed 16 days after injection. **A**) Tumor size, measured by digital caliper (mass = (length x width x height) \*  $\pi/6$ ) together with representative low magnification H/E images of the retrieved lesions. Scale bar: 500  $\mu$ m. **B**) Quantification of double immunofluorescence analysis for KI67 positive RFP-expressing YUMM1.7 cells in tumors. > 50 cells in 3-5 fields on digitally-retrieved images were counted using ImageJ software looking at individual cells. n (control versus experimental lesions) = 8; two-tailed paired t test, \* p < 0.05. **C-F**) FACS analysis of tumor dissociated cells for **(C)** total numbers of macrophage cells (CD45<sup>+</sup> Gr-1<sup>-</sup> F4/80<sup>+</sup> CD11b<sup>+</sup>) and percentage of macrophages in the CD45<sup>+</sup> cell populations (left and right panels, respectively), **(D)** percentage of CD4<sup>+</sup> T cells (CD45<sup>+</sup> CD3<sup>+</sup> CD4<sup>+</sup>) over total CD45<sup>+</sup> leukocytes and fraction of T<sub>Regs</sub> (CD45<sup>+</sup> CD3<sup>+</sup> CD4<sup>+</sup> FoxP3<sup>+</sup>) within CD4<sup>+</sup> T cells, **(E)** percentage of CD8<sup>+</sup> T cells (CD45<sup>+</sup> CD3<sup>+</sup> CD8<sup>+</sup>) over total CD45<sup>+</sup> leukocytes and **(F)** of CD44<sup>+</sup> population of CD8<sup>+</sup> T cells together with mean fluorescence intensity levels of LAG-3 and PD-1 staining in CD44<sup>+</sup> fraction cells. n (control versus experimental lesions) = 8; two-tailed paired t test, \*P < 0.05; \*\* P < 0.01.

# Supplementary Materials for

## Sustained Androgen Receptor signaling is a determinant of melanoma cell growth potential and tumorigenesis

Min Ma<sup>1+</sup>, Soumitra Ghosh<sup>1+</sup>, Daniele Tavernari<sup>2,3</sup>, Atul Katarkar<sup>1</sup>, Andrea Clocchiatti<sup>4,5</sup>, Luigi Mazzeo<sup>1</sup>, Anastasia Samarkina<sup>1</sup>, Justine Epiney<sup>1</sup>, Yi-Ru Yu<sup>6</sup>, Ping-Chih Ho<sup>6</sup>, Mitchell P. Levesque<sup>7</sup>, Berna C. Özdemir<sup>8,9</sup>, Giovanni Ciriello<sup>2,3</sup>, Reinhard Dummer<sup>7</sup>, and G. Paolo Dotto<sup>1,4,9\*</sup>

<sup>1</sup>Department of Biochemistry, University of Lausanne, Epalinges 1066, Switzerland

<sup>2</sup>Department of Computational Biology, University of Lausanne, Lausanne 1015, Switzerland.

<sup>3</sup>Swiss Institute of Bioinformatics (SIB), Lausanne 1015, Switzerland.

<sup>4</sup>Cutaneous Biology Research Center, Massachusetts General Hospital, Charlestown, MA 02129, USA

<sup>5</sup>Department of Dermatology, Harvard Medical School, Boston, MA 02125, USA

<sup>6</sup>Department of Oncology, University of Lausanne, Ludwig Institute for Cancer Research Lausanne, Epalinges 1066, Switzerland

bioRxiv preprint doi: <https://doi.org/10.1101/2020.05.20.116625>; this version posted May 20, 2020. The copyright holder for this preprint (which was not certified by peer review) is the author/funder. All rights reserved. No reuse allowed without permission.

<sup>7</sup>Department of Dermatology, University Hospital Zürich, University of Zürich, Zürich 8091, Switzerland <sup>7</sup>

<sup>8</sup>Department of Oncology, Centre Hospitalier Universitaire Vaudois, 1011 Lausanne, Switzerland

<sup>9</sup>International Cancer Prevention Institute, Epalinges 1066, Switzerland

+ Co-first authors

\* Correspondence: [paolo.dotto@unil.ch](mailto:paolo.dotto@unil.ch)

Running Title: Androgen signaling loss suppresses melanoma growth

### This PDF files includes

Supplementary Figures 1 to 19

### Other Supplementary Materials for this manuscript include the following:

Supplementary Table 1 to 6

# Supplementary Figure 1

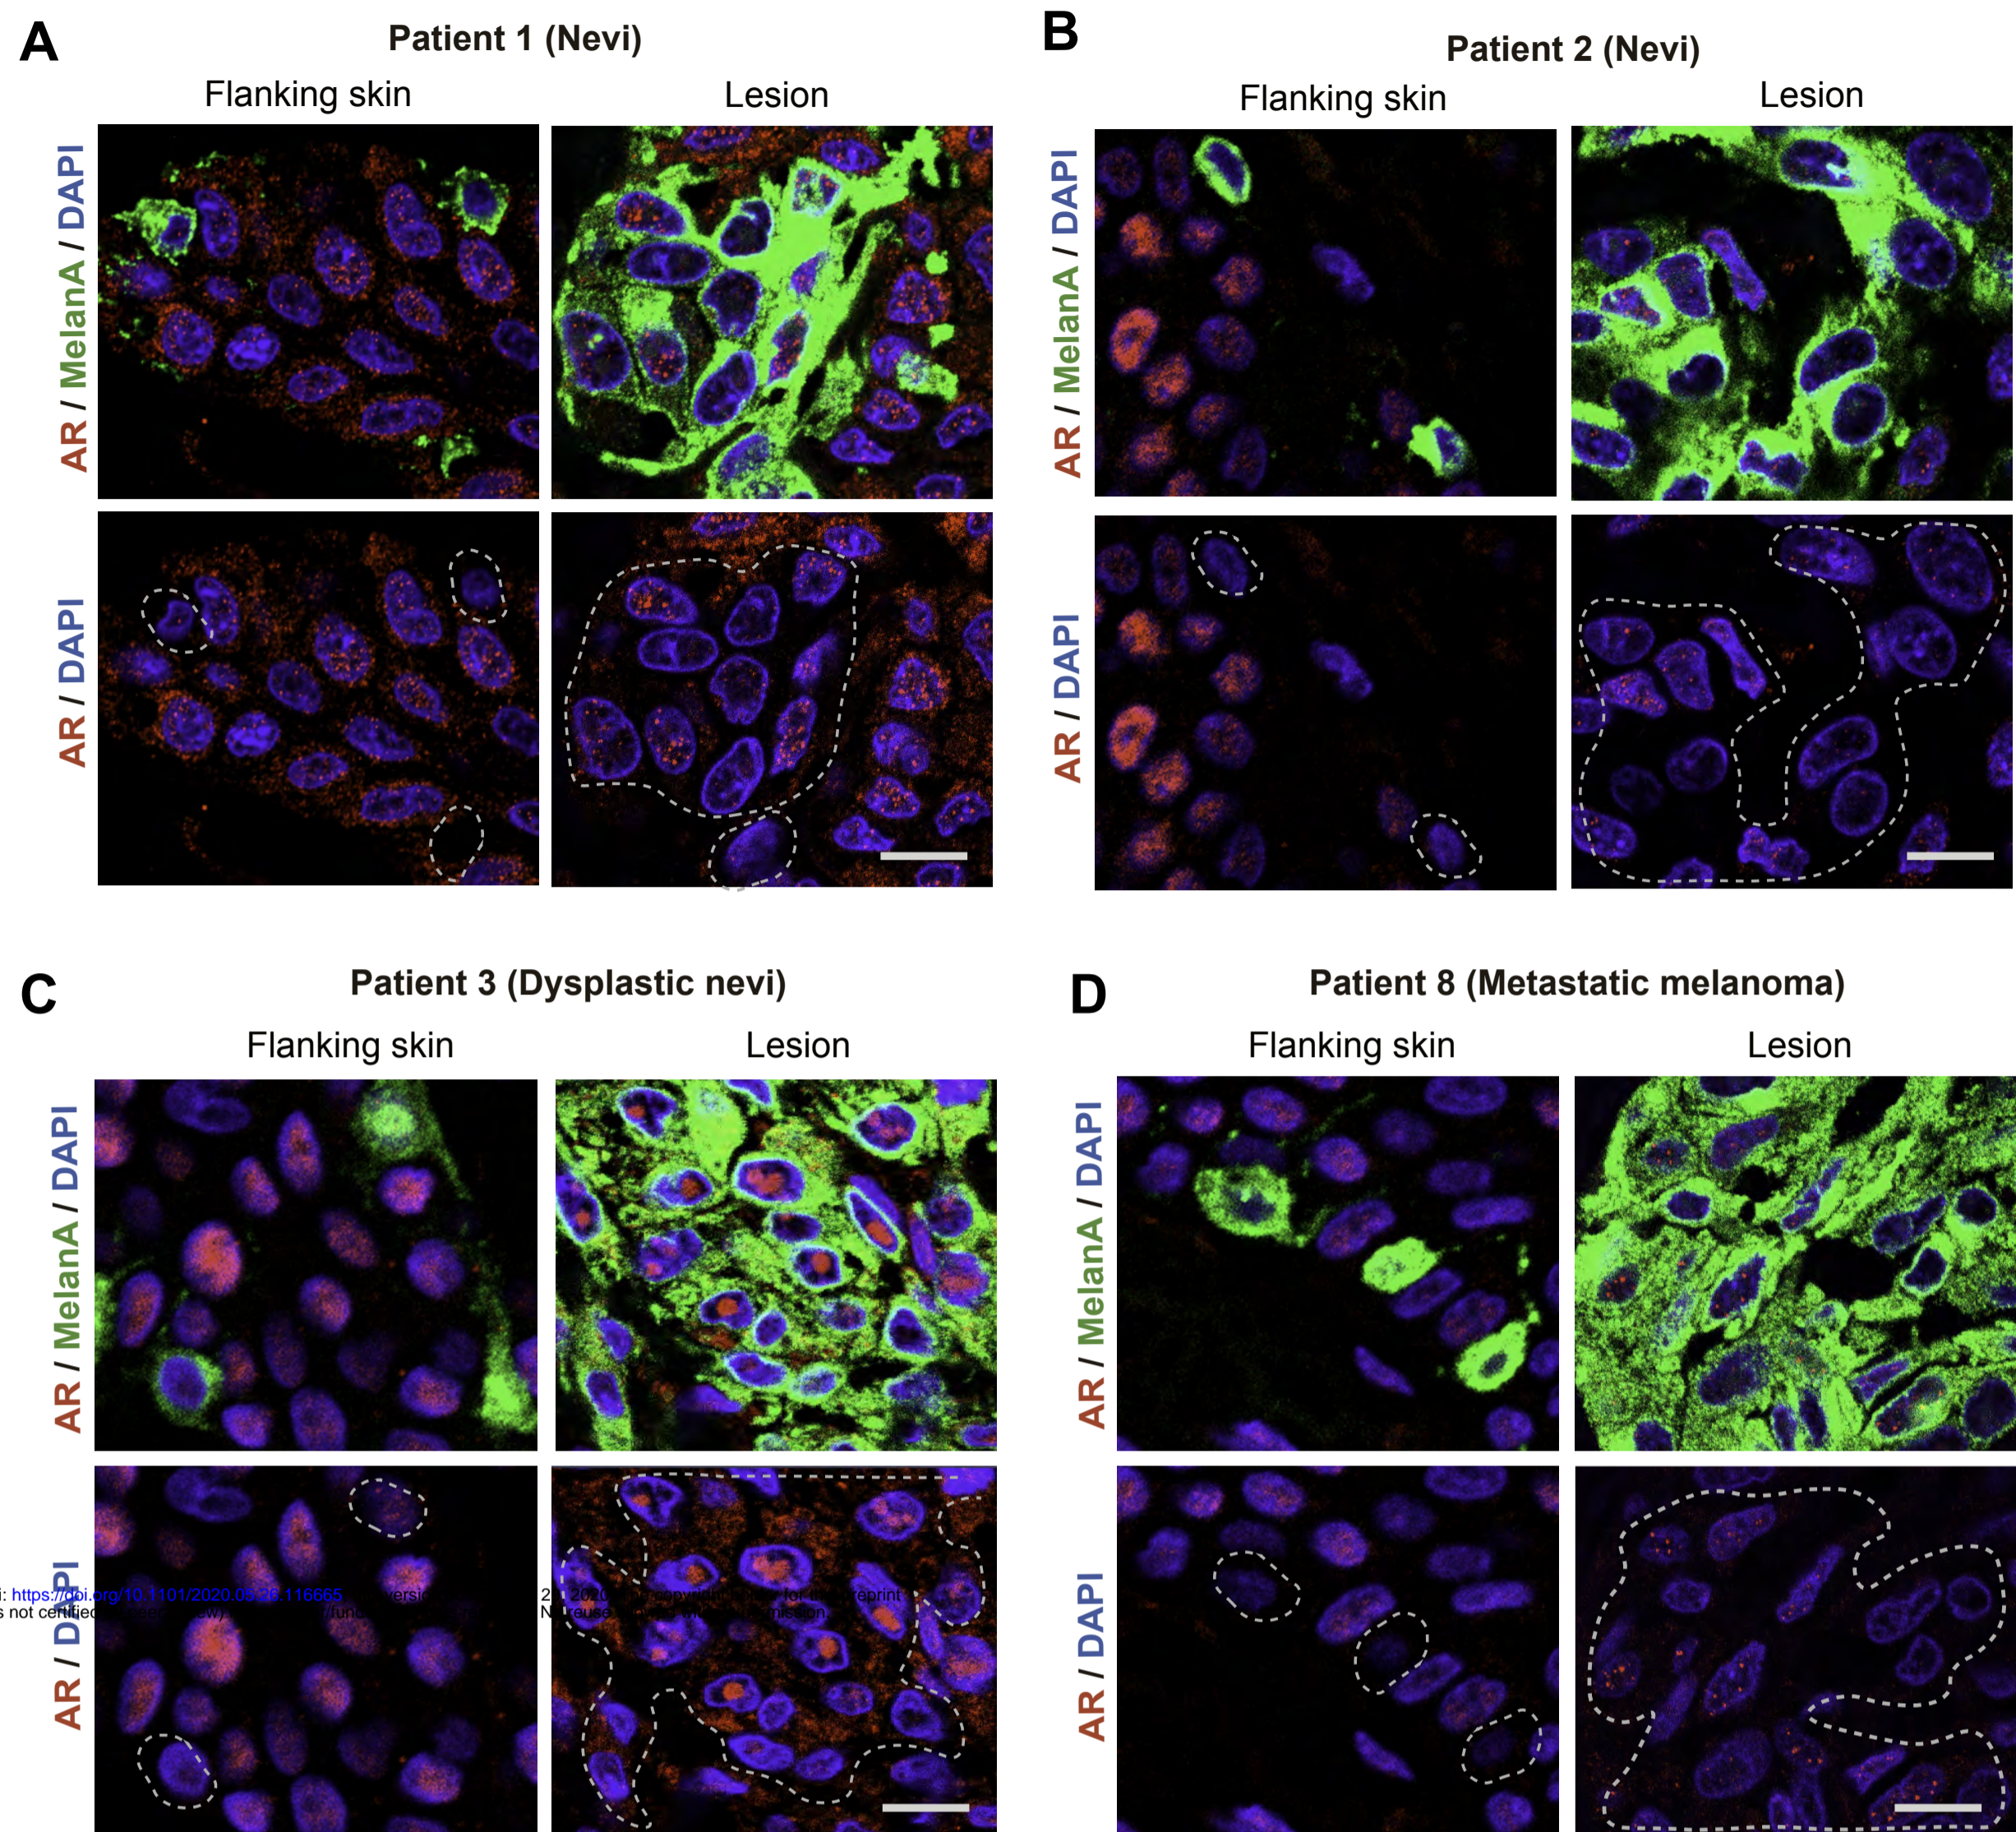

bioRxiv preprint doi: <https://doi.org/10.1101/2020.05.23.116665>; this version posted May 24, 2020. The copyright holder for this preprint (which was not certified by peer review) is the author/funder, who has granted bioRxiv a license to display the preprint in perpetuity. It is made available under aCC-BY-NC-ND 4.0 International license.

**Supplementary Figure 1. Related to Figure 1A. Double immunofluorescence analysis of patient-derived melanocytic lesions.** Double immunofluorescence images of benign nevi (A, B), dysplastic nevi (C), and metastatic melanoma (D) in parallel with flanking skin stained with anti-MelanA (green) and anti-AR (ab74272) (red) antibodies. Highlighted in the lower panels are representative MelanA positive cells and areas used for quantification in Figure 1A. Scale bar: 10  $\mu\text{m}$ .

## Supplementary Figure 2

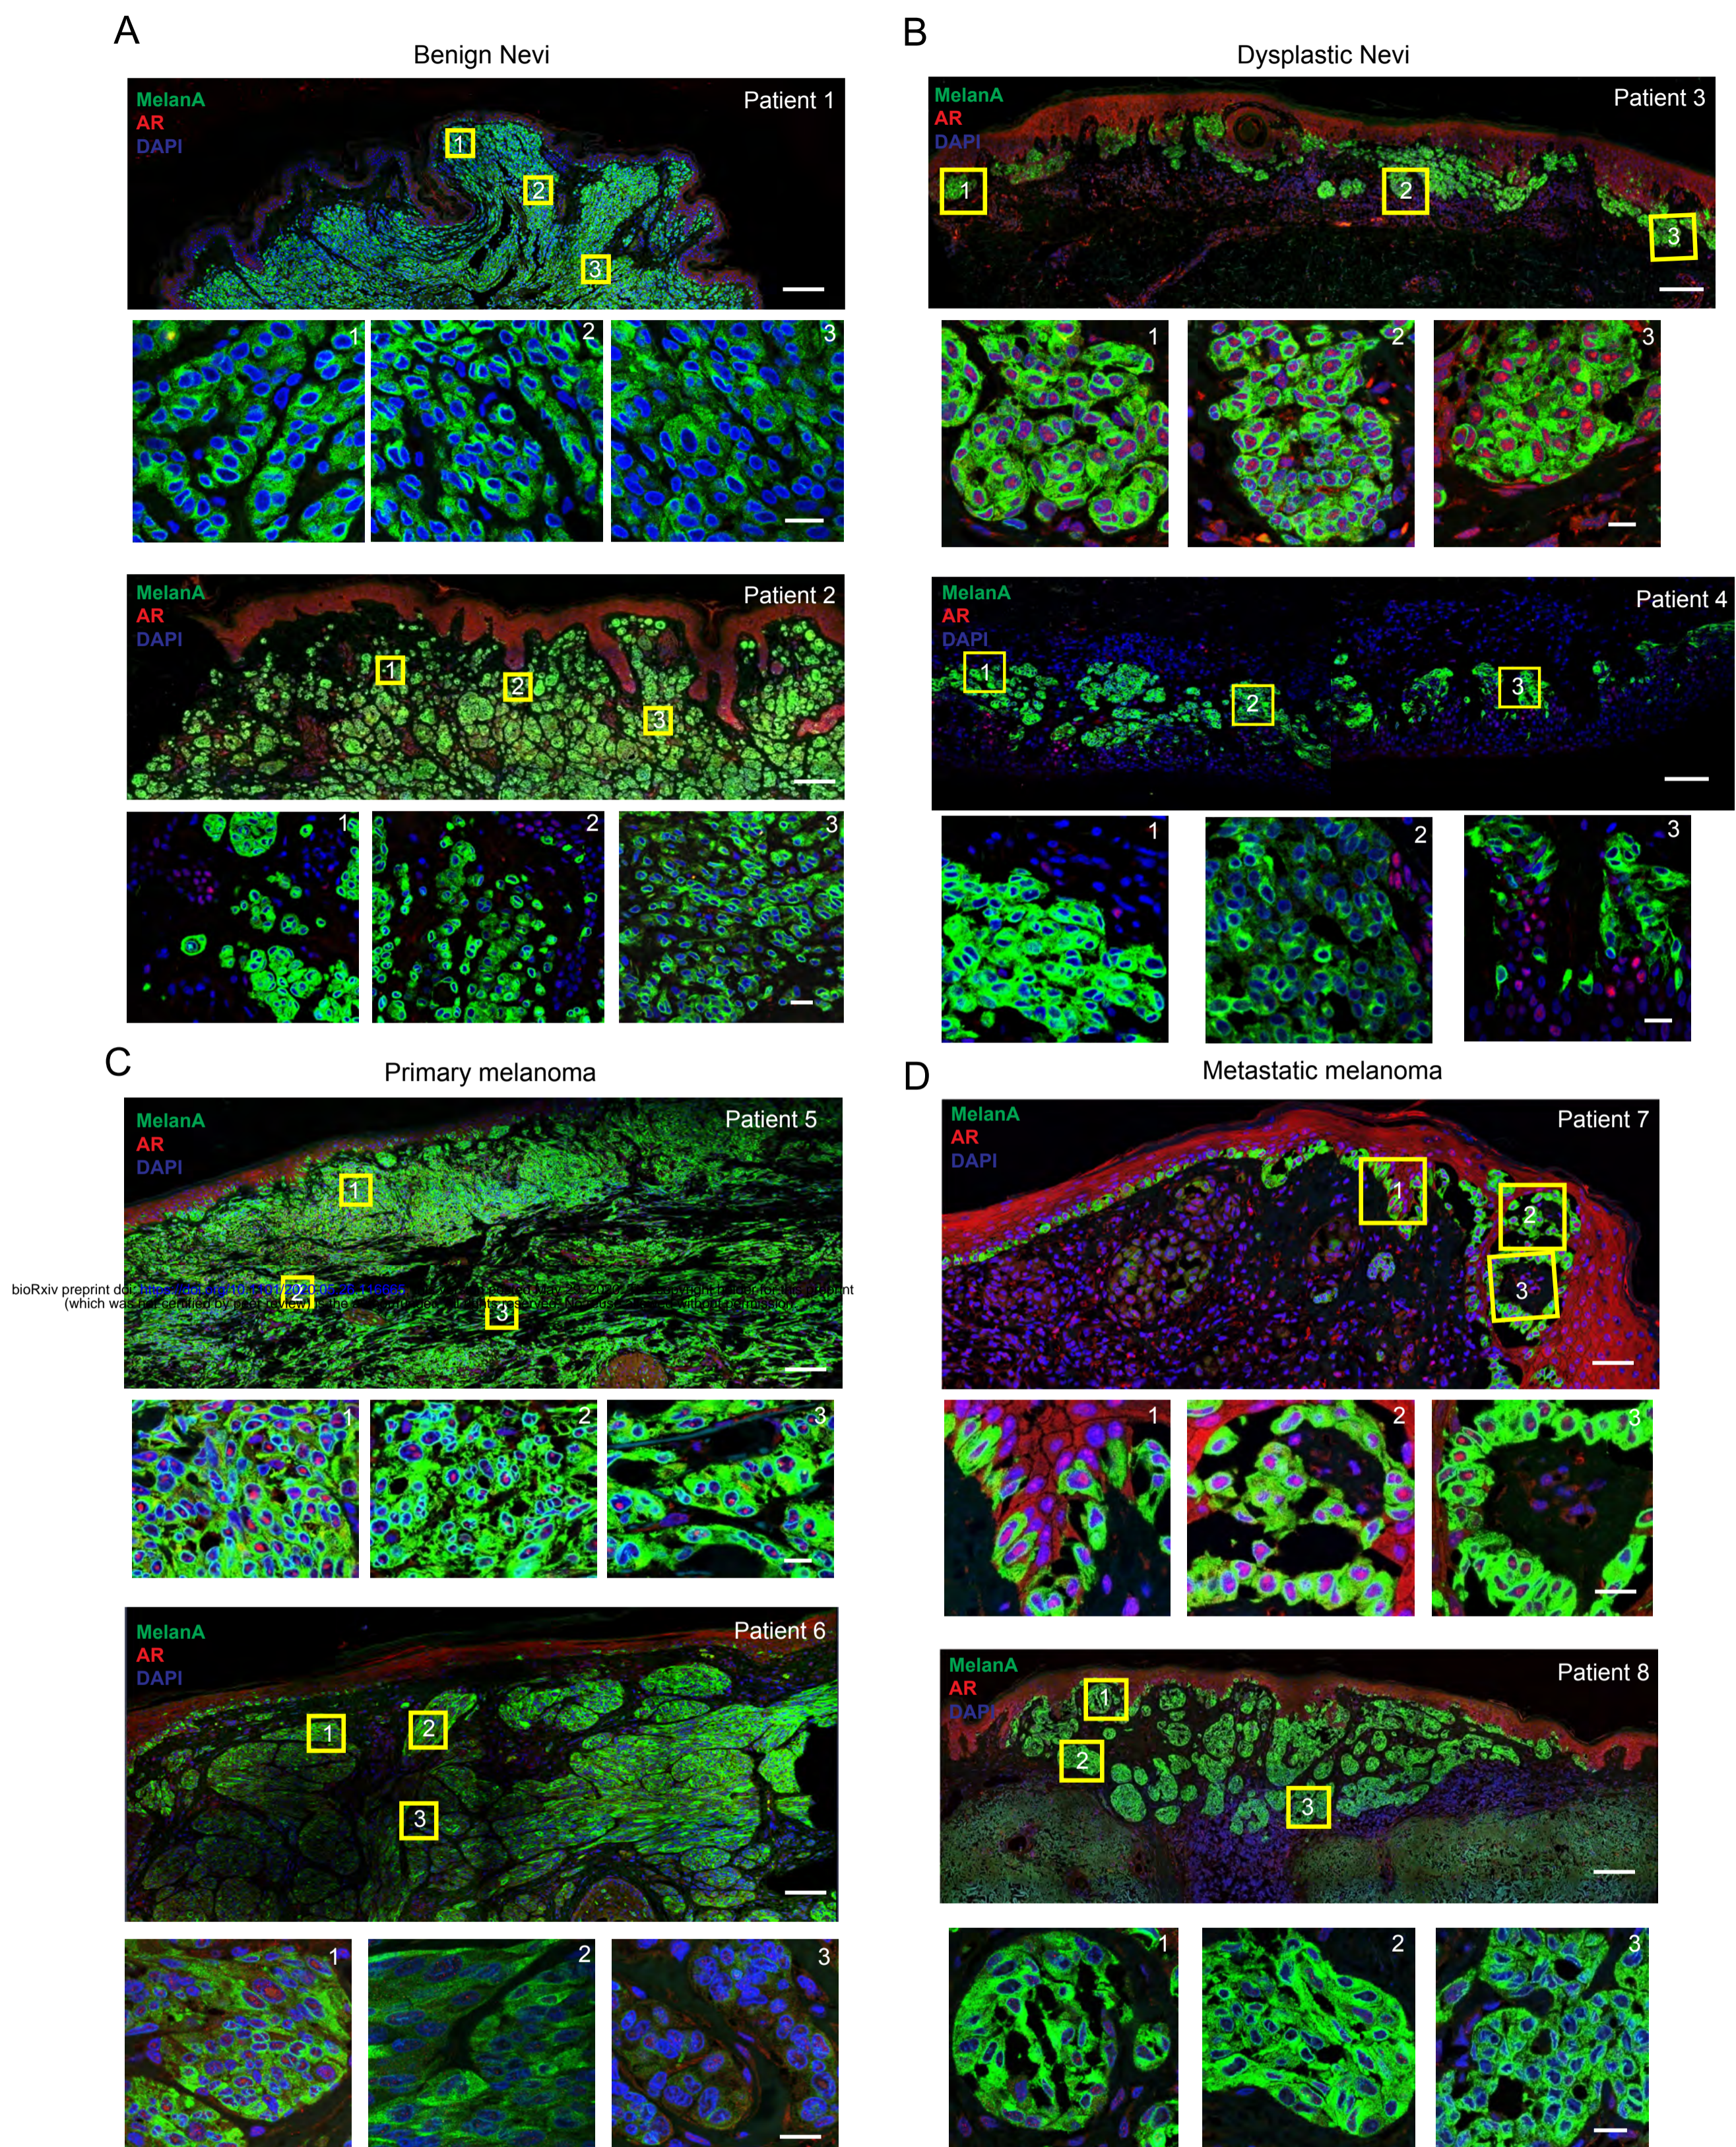

**Supplementary Figure 2. Related to Figure 1B. Double immunofluorescence analysis of patient-derived melanocytic lesions.** Immunofluorescence staining of benign nevi (A, patient 1 and 2), dysplastic nevi (B, patient 3 and 4), primary melanoma (C, patient 5 and 6) and metastatic melanoma (D, patient 7 and 8) skin tissues with anti-MelanA (green) and anti-AR(ab74272) (red) antibodies, and topographically distinct areas (boxes 1, 2 and 3) utilized for single cell AR expression quantification in Fig. 1B. Shown are representative low and high magnification images of the areas used for quantification. Scale bar: 2 mm and 20  $\mu$ m, respectively.

## Supplementary Figure 3

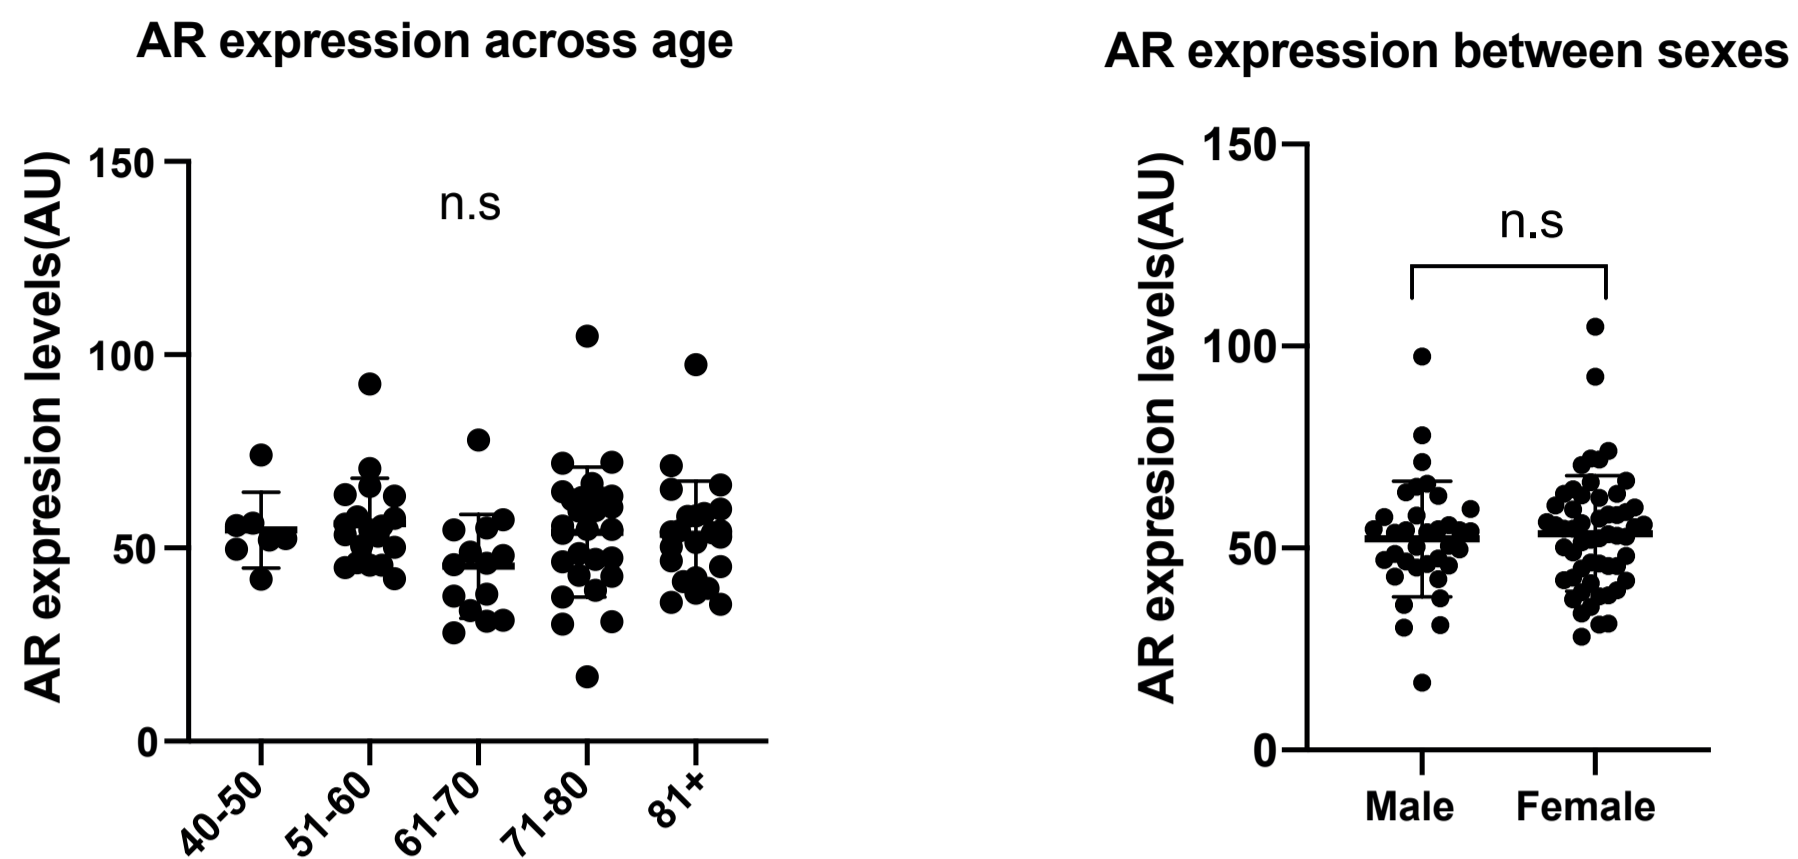

**Supplementary Figure 3. Related to Figure 1C. AR expression across age and between sexes in a melanoma tissue microarray.** Quantification of AR fluorescence signal in MelanA-positive cells in a tissue microarray of melanoma patients divided by age or sex. Quantification was based on digitally-acquired images of three independent fields per clinical lesion (a minimum of 50 cells per field) on the arrays. Results are expressed as average values for each lesion (dots) together with mean across years of age (left) or sex (right) of patients.

## Supplementary Figure 4

### A. High expression of AR

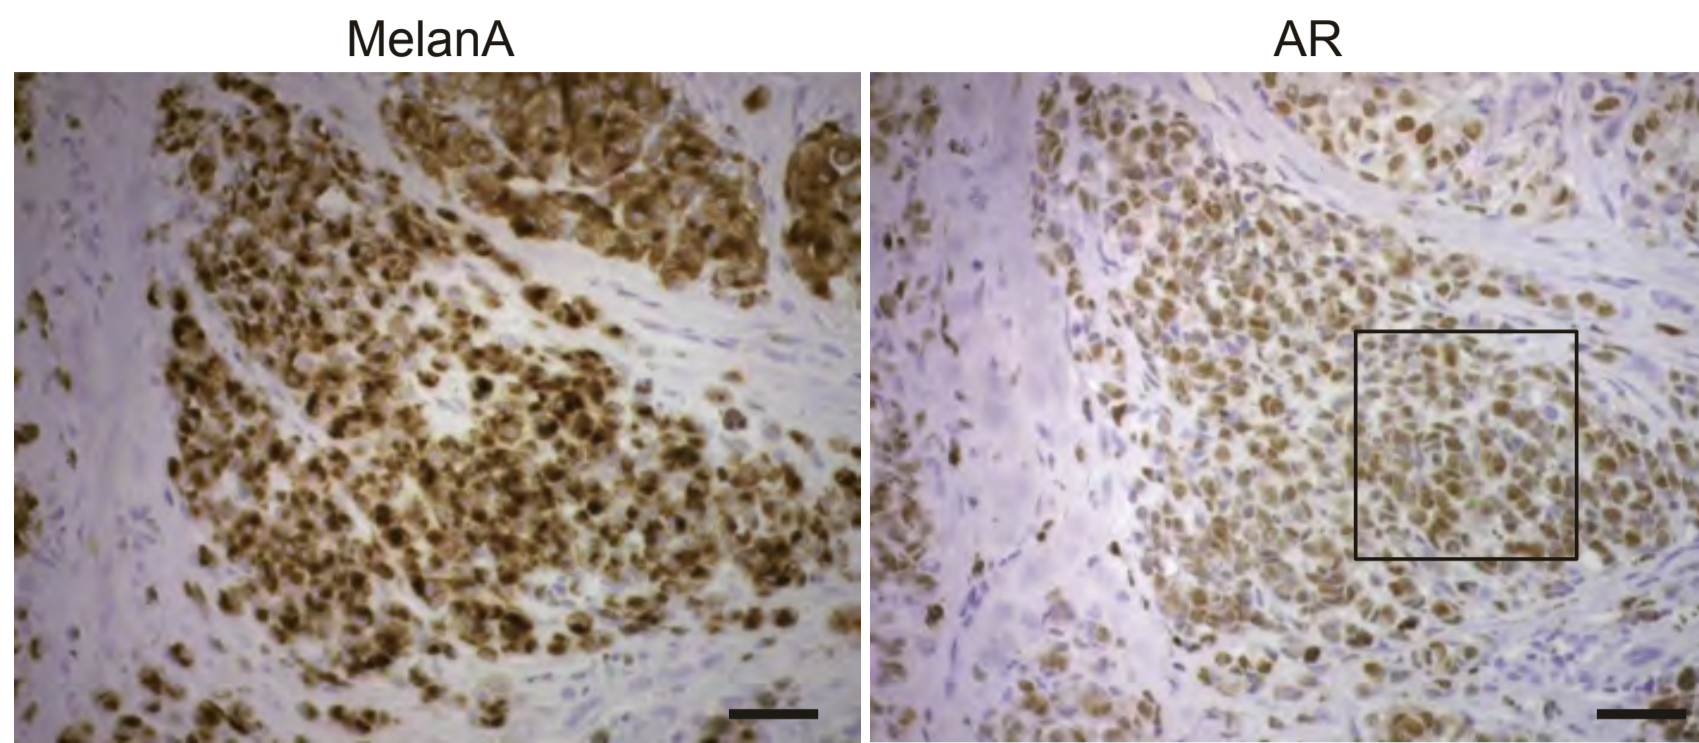

### B. Intermediate expression of AR

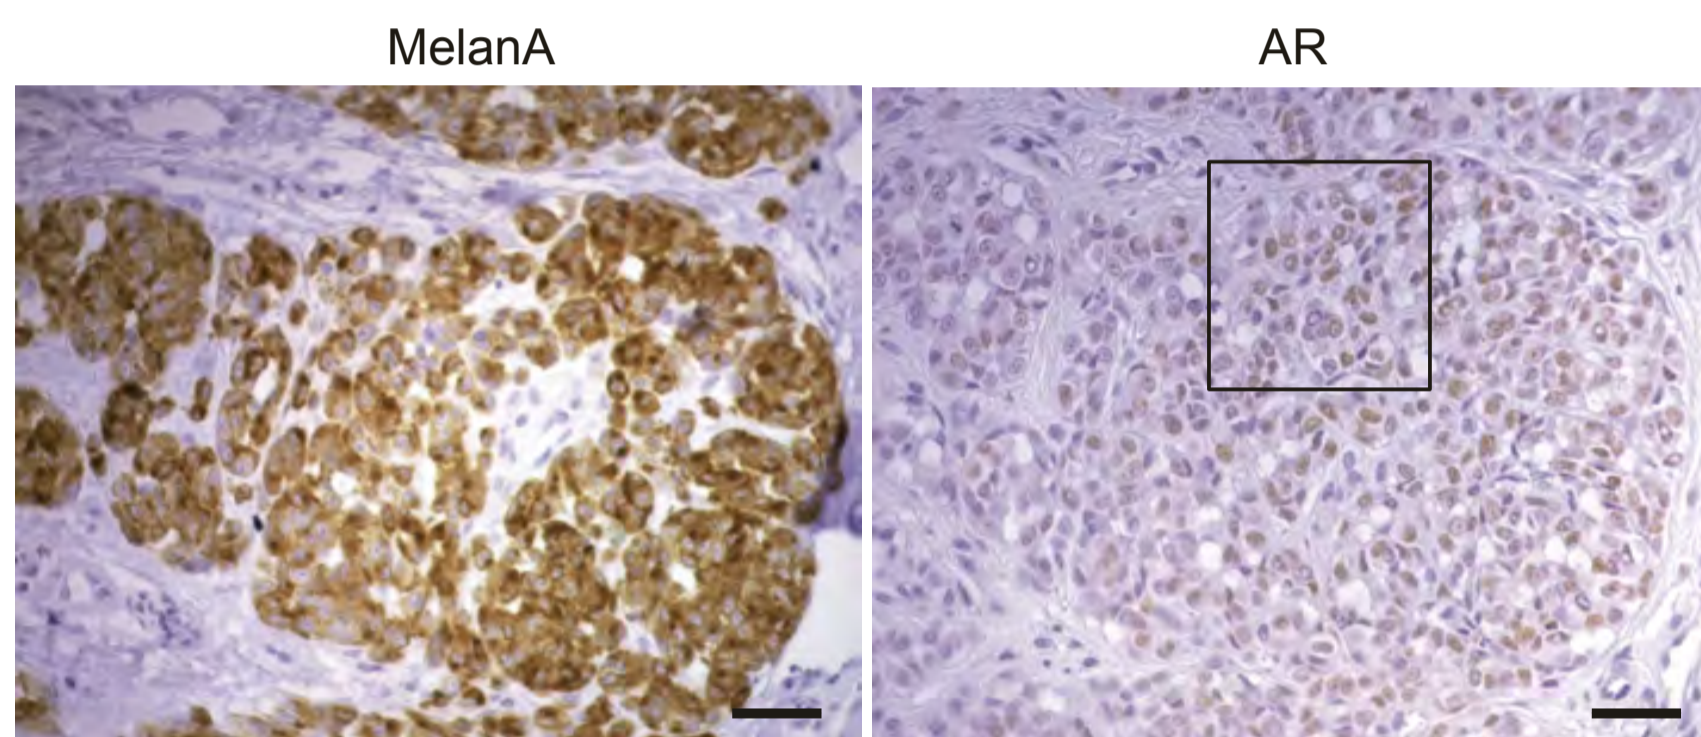

bioRxiv preprint doi: <https://doi.org/10.1101/2020.05.26.116665>; this version posted May 29, 2020. The copyright holder for this preprint (which was not certified by peer review) is the author/funder. All rights reserved. No reuse allowed without permission.

### C. Low expression of AR

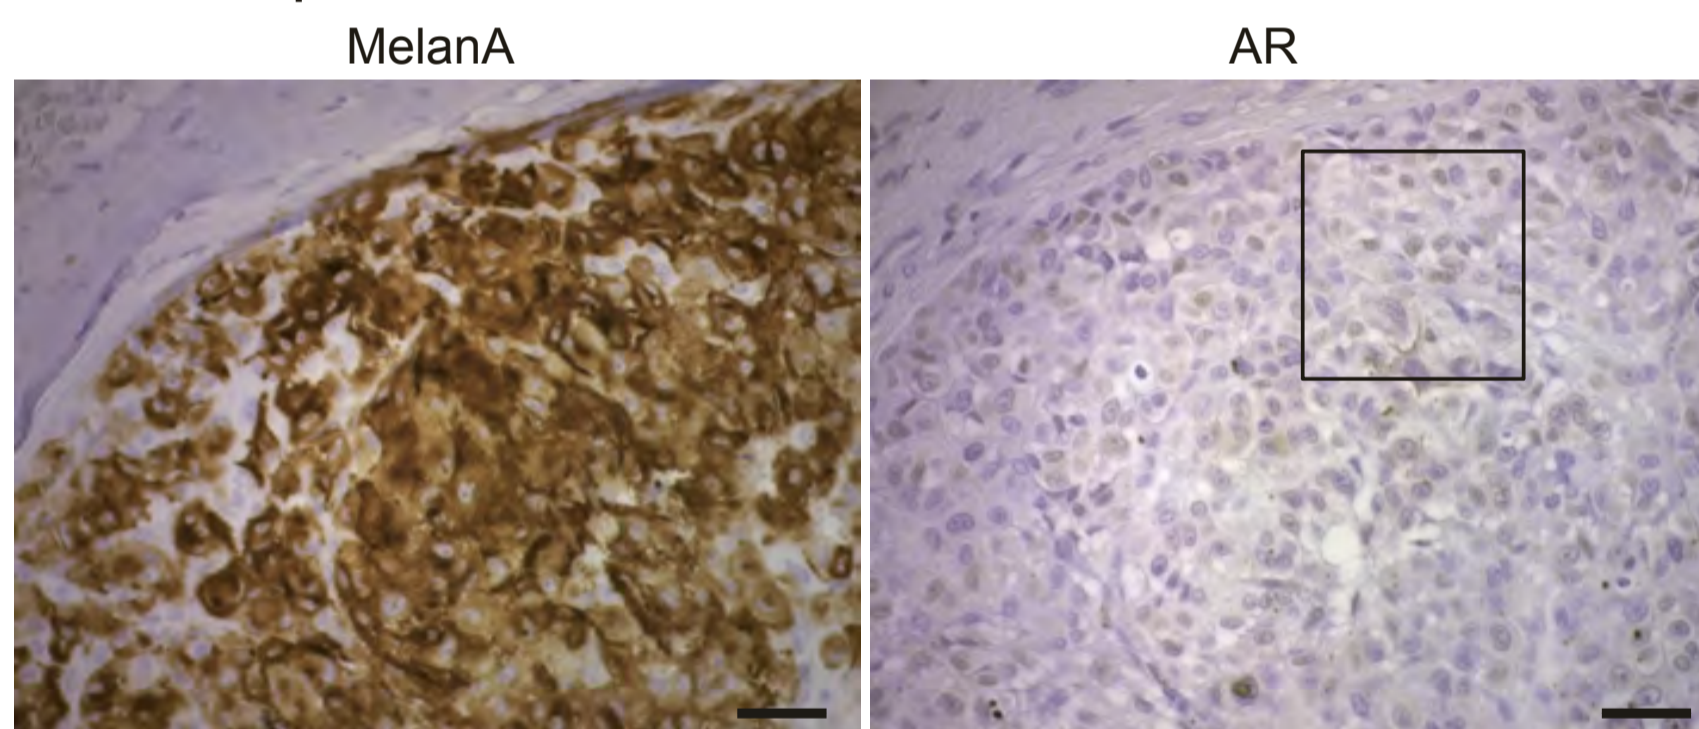

**Supplementary Figure 4. Related to Figure 1D. Immunohistochemical analysis of AR expression in patient-derived melanocytic lesions.** Immunohistochemical staining with anti-MelanA and anti-AR (ab74272) antibodies of parallel sections of different melanomas with high (A), intermediate (B) and low (C) level of AR expression as quantified by double immunofluorescence analysis in Fig. 1B. Shown are representative images, with enlarged boxed areas shown in Fig. 1D. Scale bar: 50  $\mu$ m.



## Supplementary Figure 5

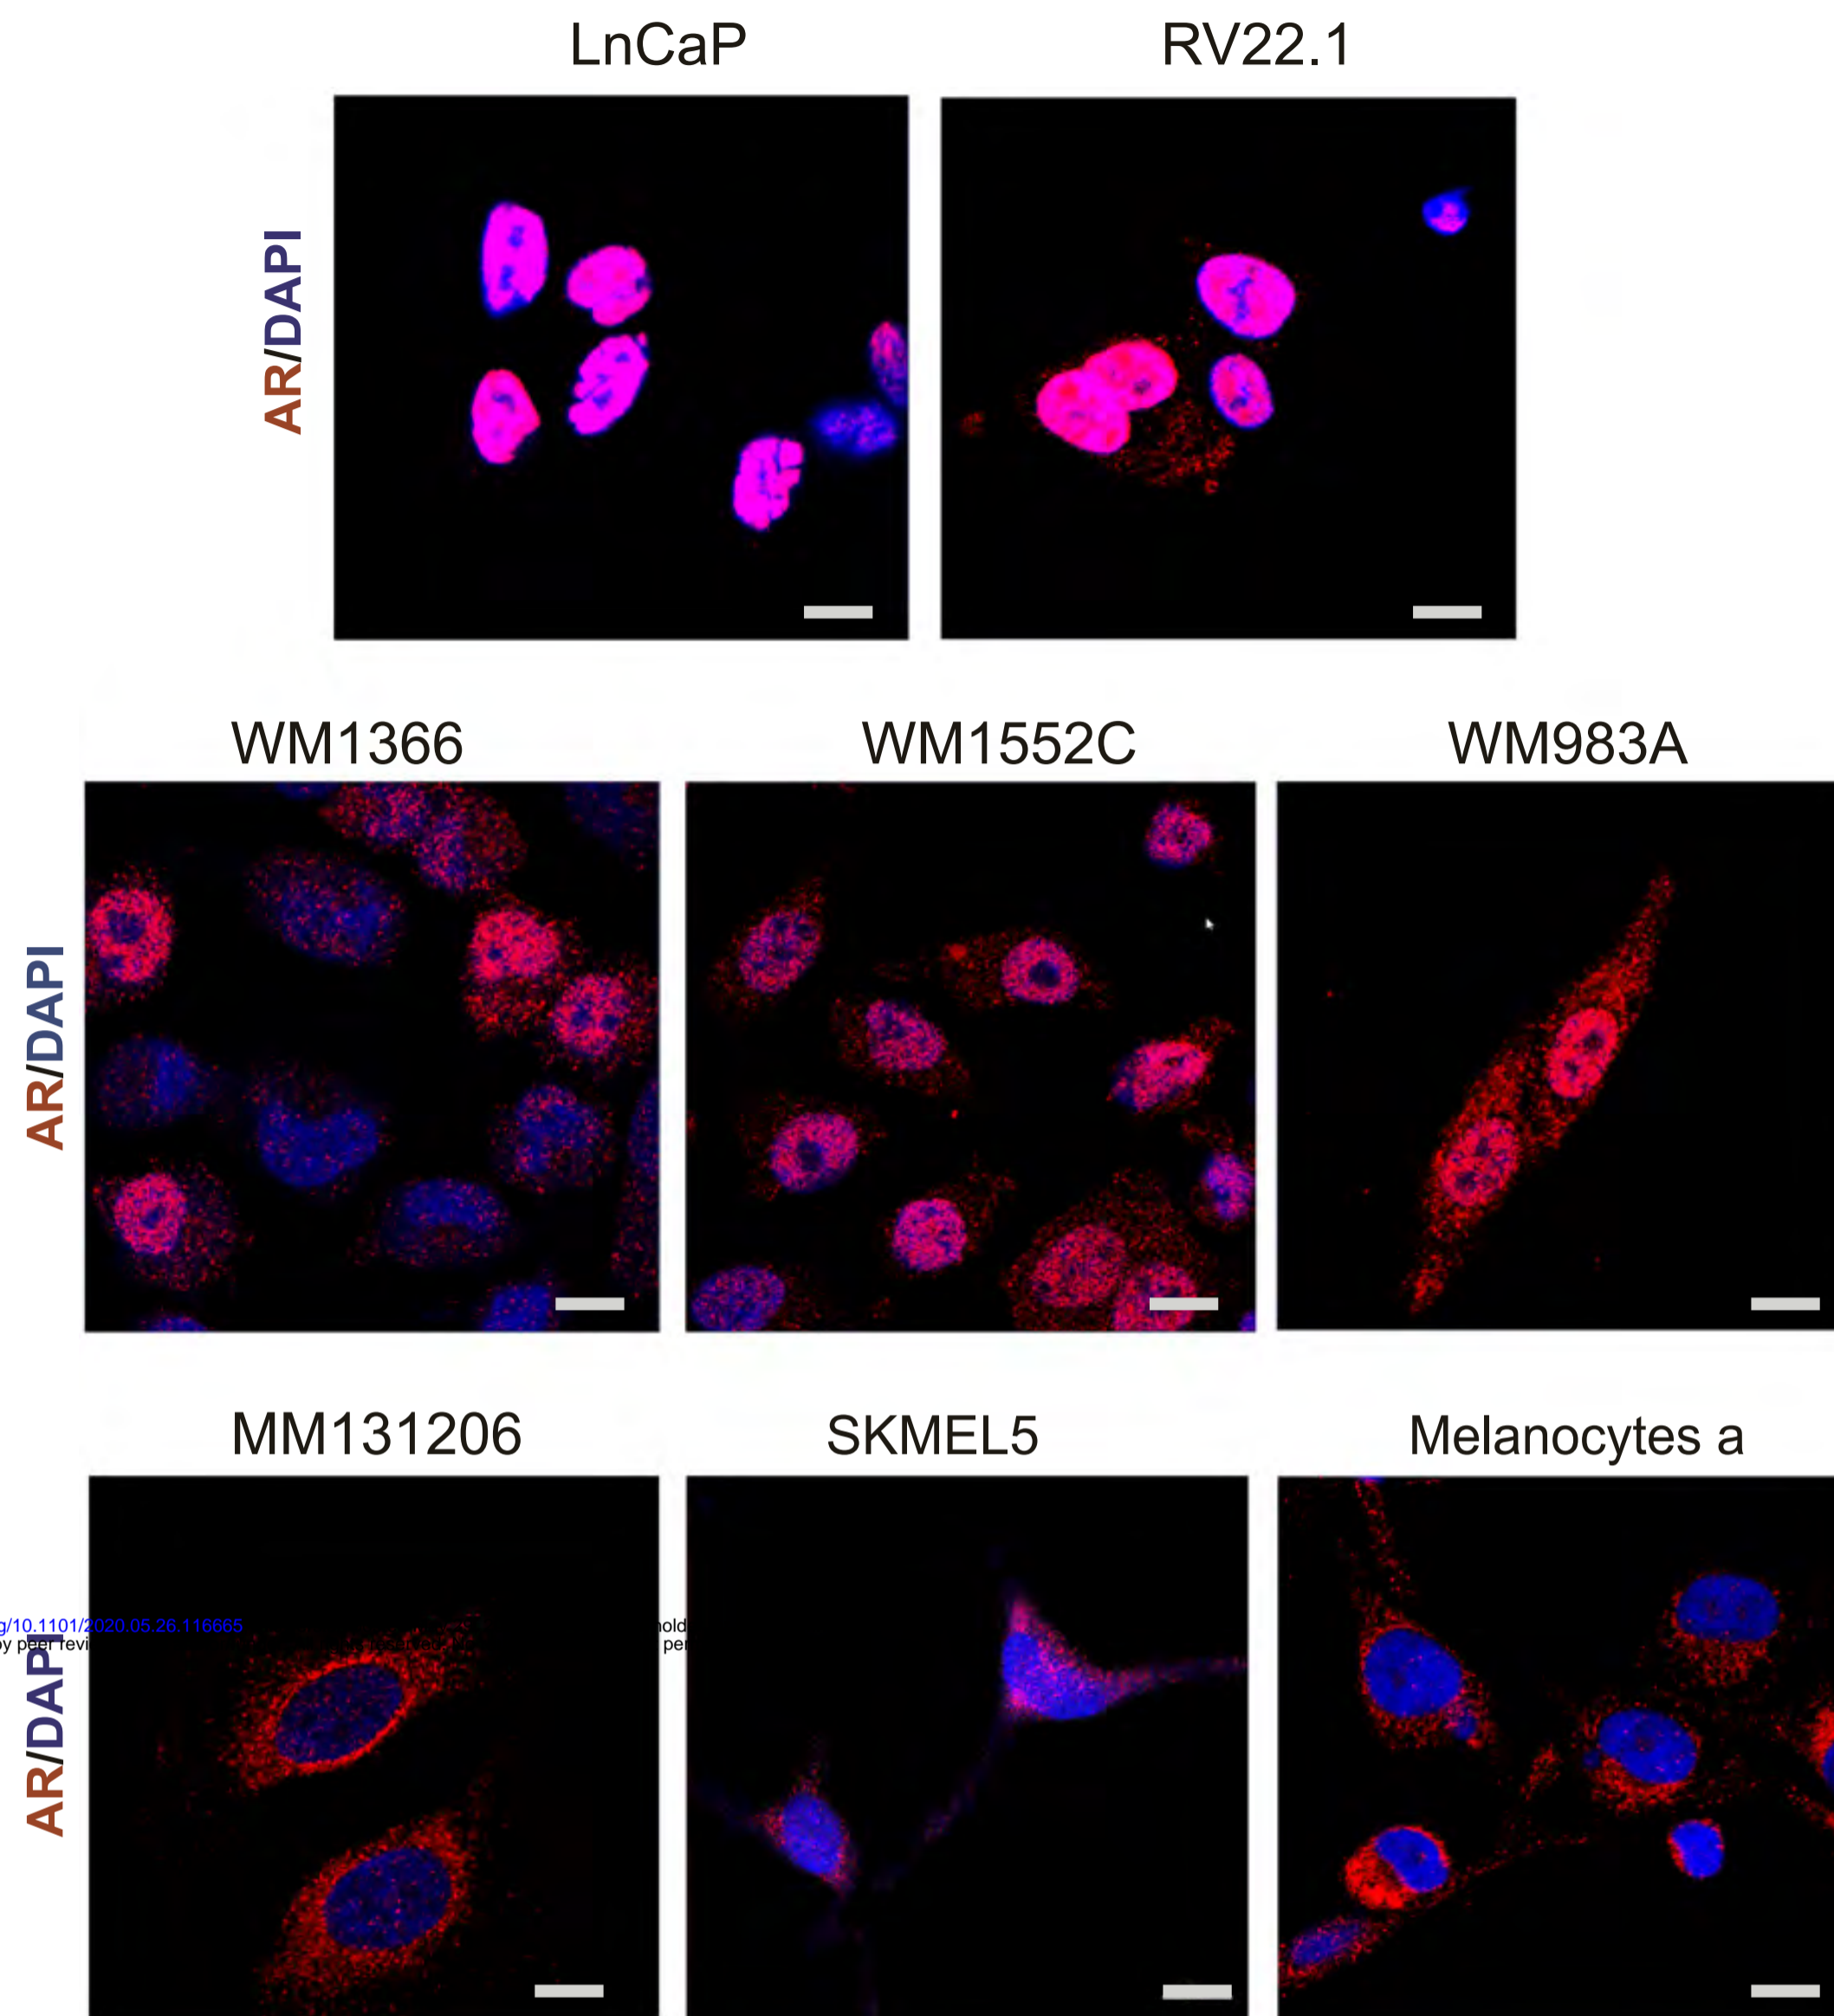

**Supplementary Figure 5. Related to Figure 1E. Immunofluorescence analysis of AR expression in different melanoma cell lines and primary human melanocytes with prostate cancer cells as comparison.** Representative images of the indicated prostate cancer cells lines (LnCaP, 22RV.1), melanoma cell lines and primary melanoma cells with high (WM1366, WM1552C, WM983A) and low AR (MM131206, SKMEL5) expression and primary human melanocytes (strain a) stained with anti-AR (red) antibody (D6F11) and DAPI (blue) nuclear staining. Scale bar: 10 μm.

## Supplementary Figure 6

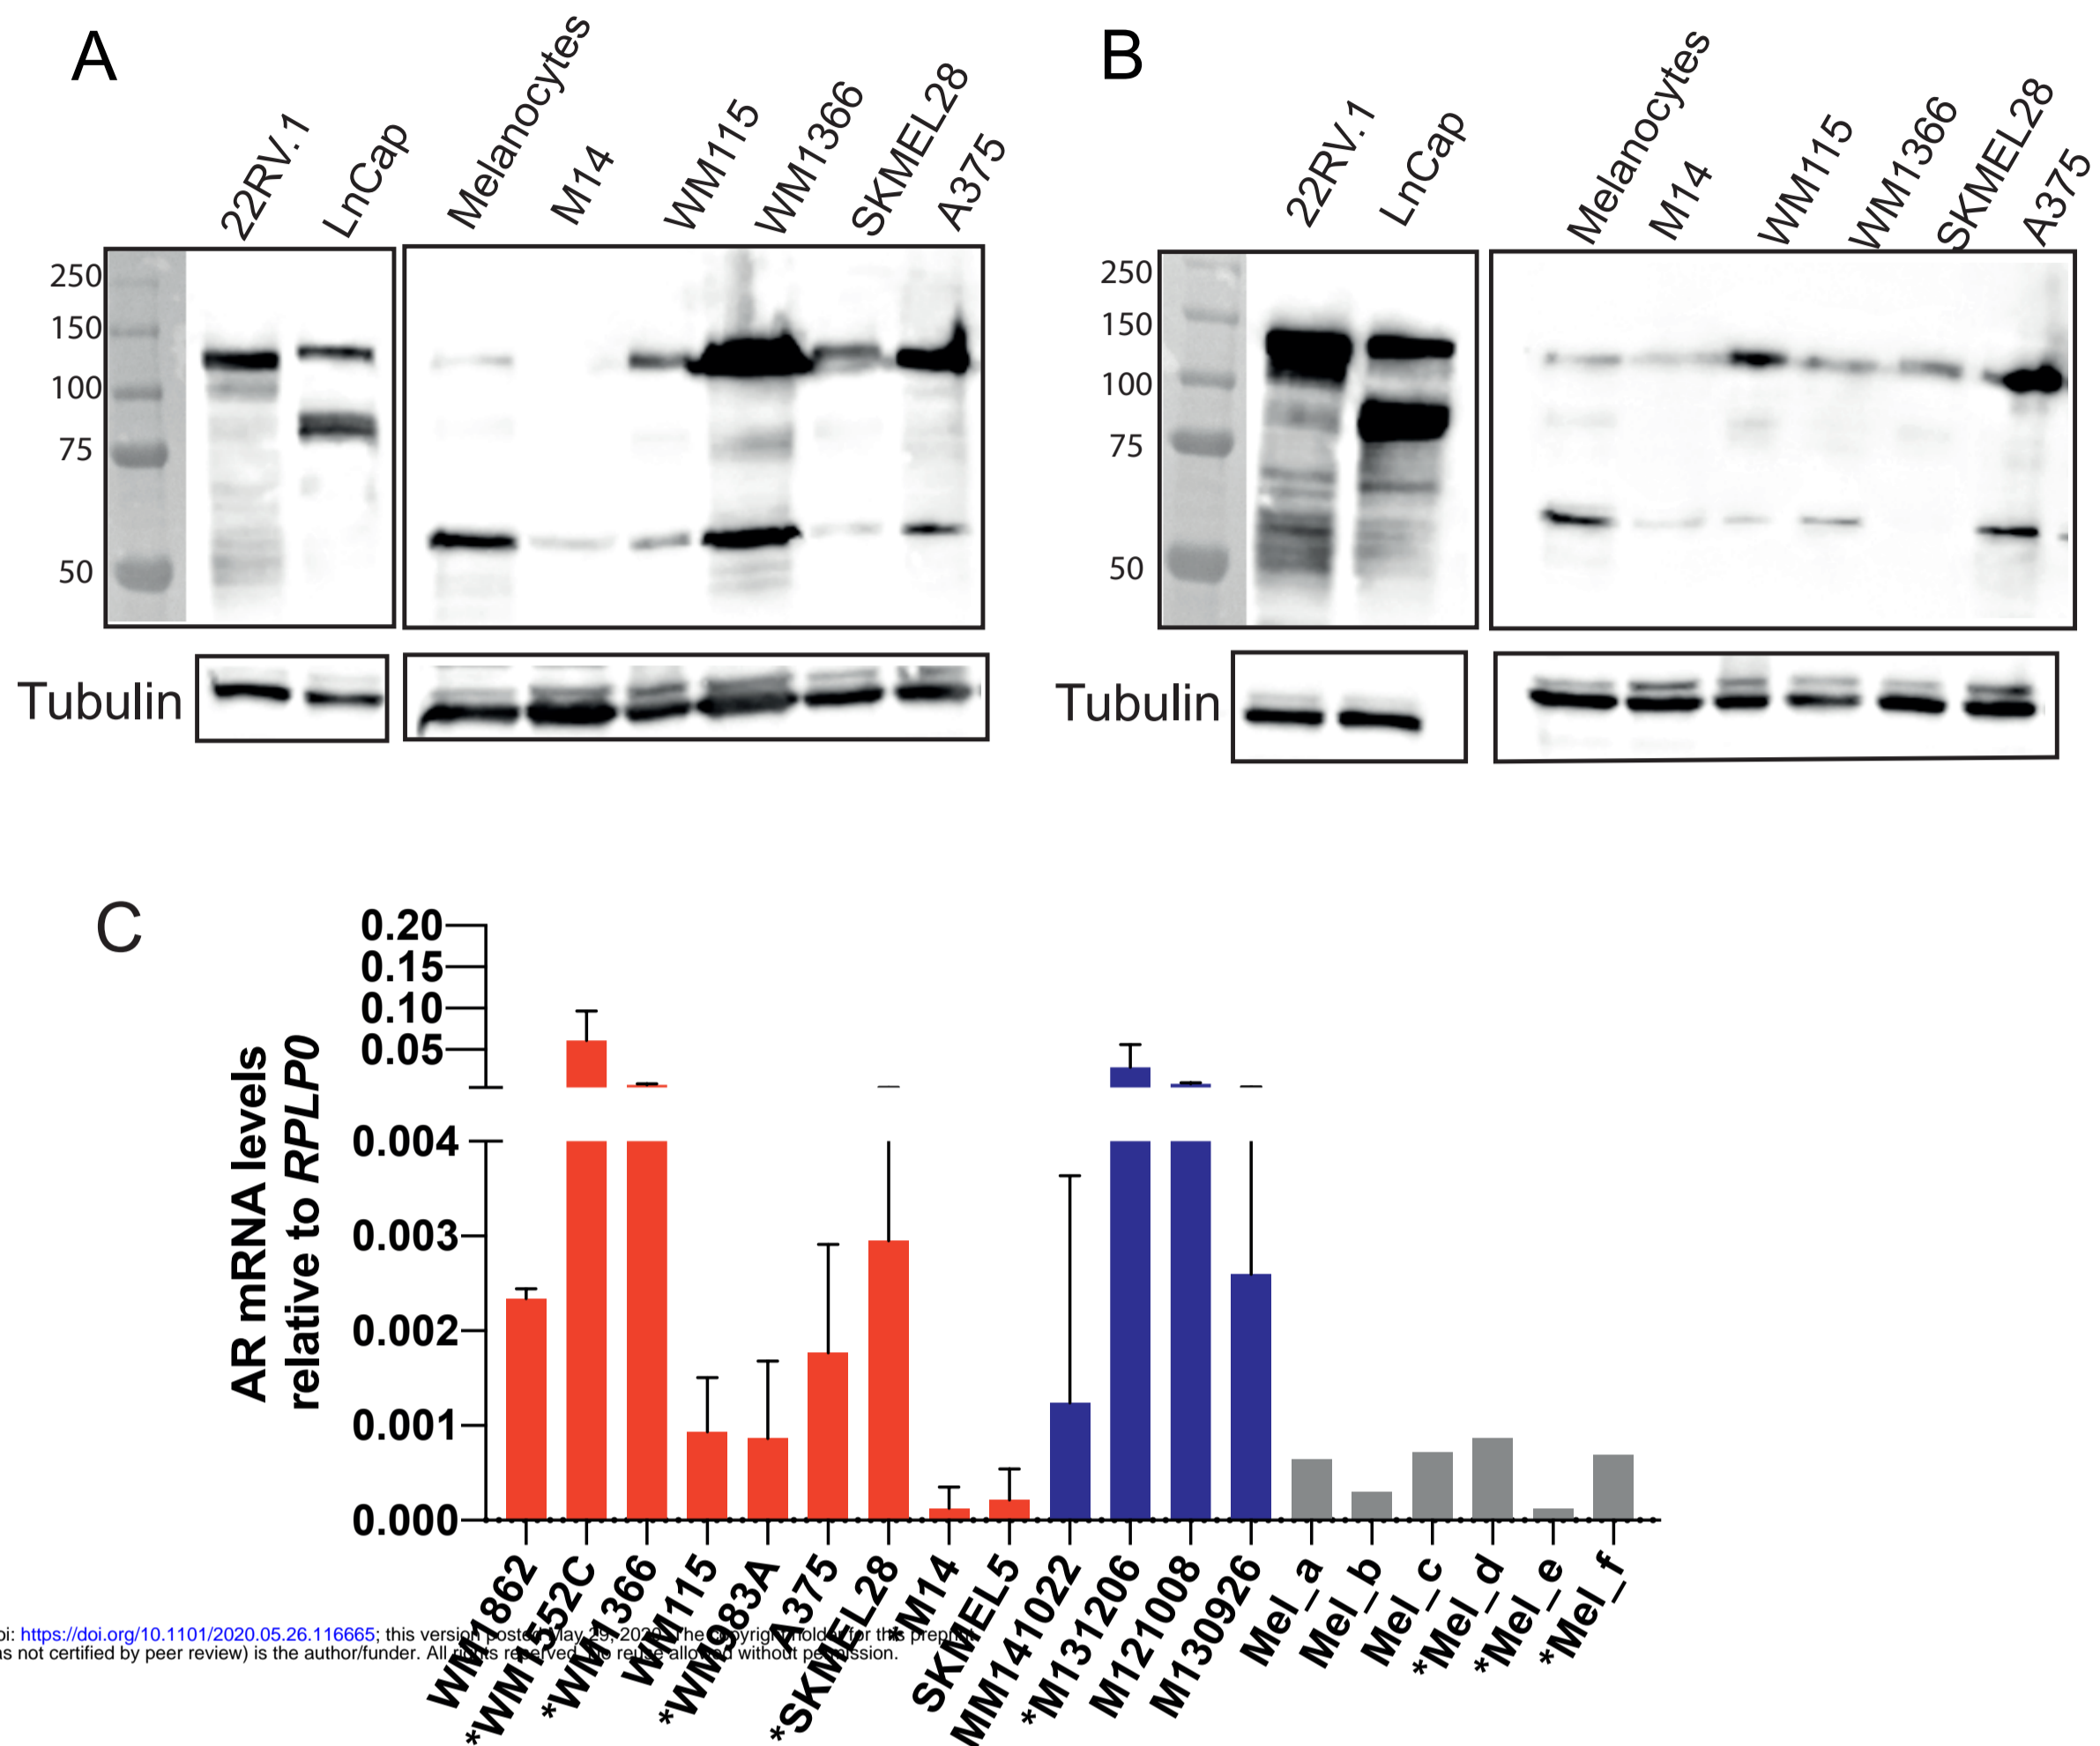

bioRxiv preprint doi: <https://doi.org/10.1101/2020.05.26.116665>; this version posted May 29, 2020. The copyright holder for this preprint (which was not certified by peer review) is the author/funder. All rights reserved. No reuse allowed without permission.

**Supplementary Figure 6. Related to Figure 1. AR expression in different melanoma cell lines and primary human melanocytes as detected by two different antibodies.** AR expression) in melanoma cell lines (A375, SKMEL28, WM1366, WM115 and M14) and primary human melanocytes was assessed by immunoblot analysis with two different antibodies in parallel with prostate cancer cell lines (LnCaP, 22RV. 1) as comparison. All extracts were run in two parallel gels and blotted, respectively, with anti-AR (D6F11) (A) or anti-AR (PG-21) antibodies (B). Shown are low and high exposure images of the same blots, for better AR detection in highly expressing prostate cancer versus melanoma cells. Note a band of the expected molecular size for full length AR proteins (110 KD) detected in all tested cells and a second band around 60KD detected by the two antibodies, as a possible product of proteolytic cleavage. C) RT-qPCR analysis of AR mRNA expression in a panel of melanoma cell lines (red), early passage primary melanoma cells (blue) and primary human melanocytes (grey). Results are expressed as relative to RRLP0 values.

# Supplementary Figure 7

A

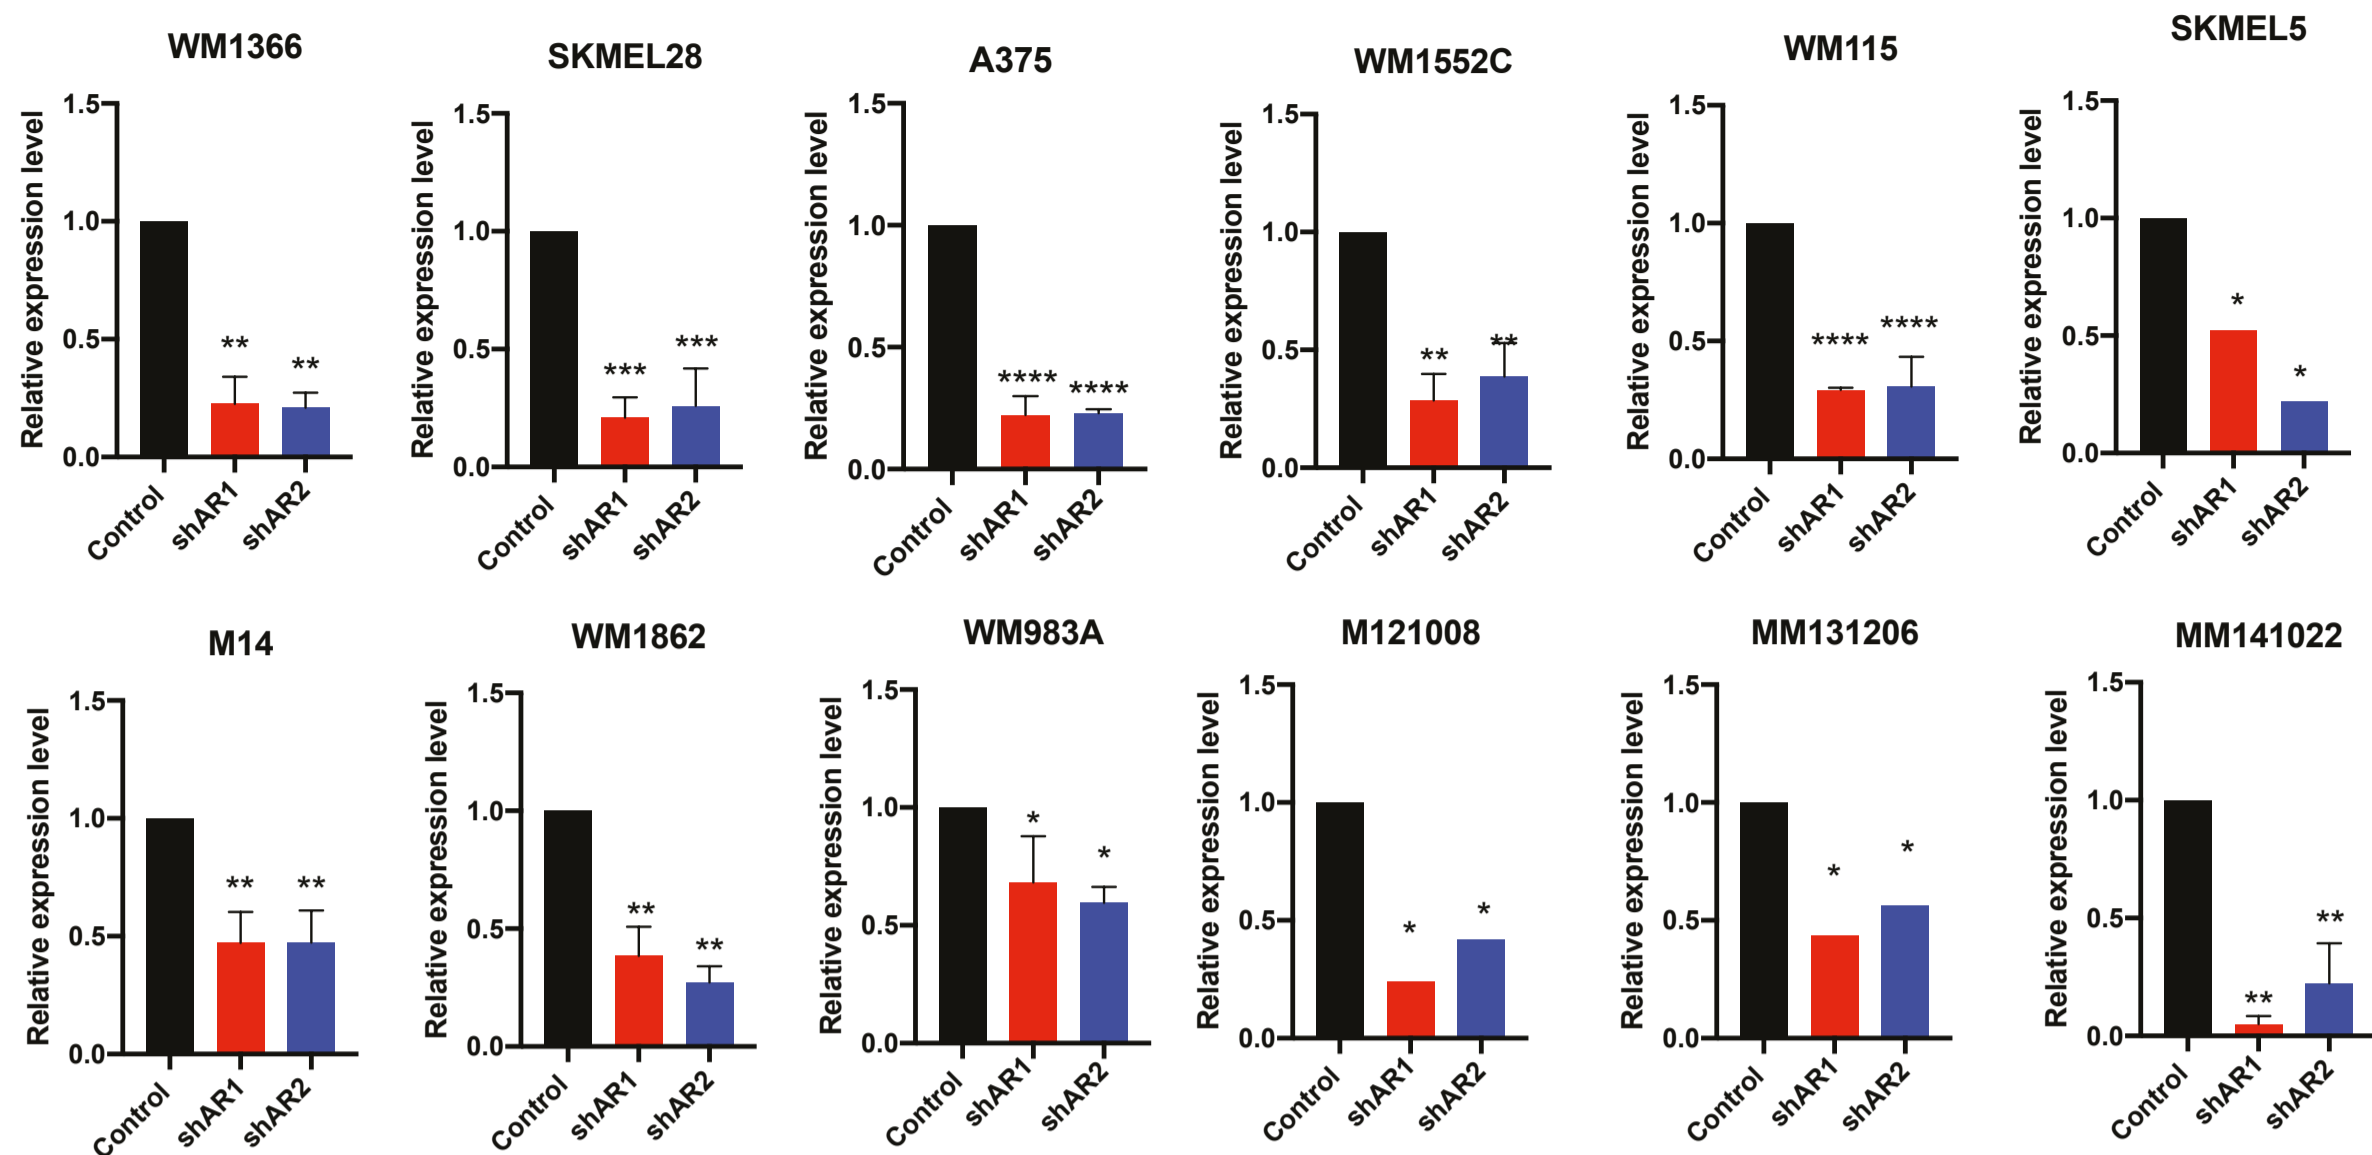

B

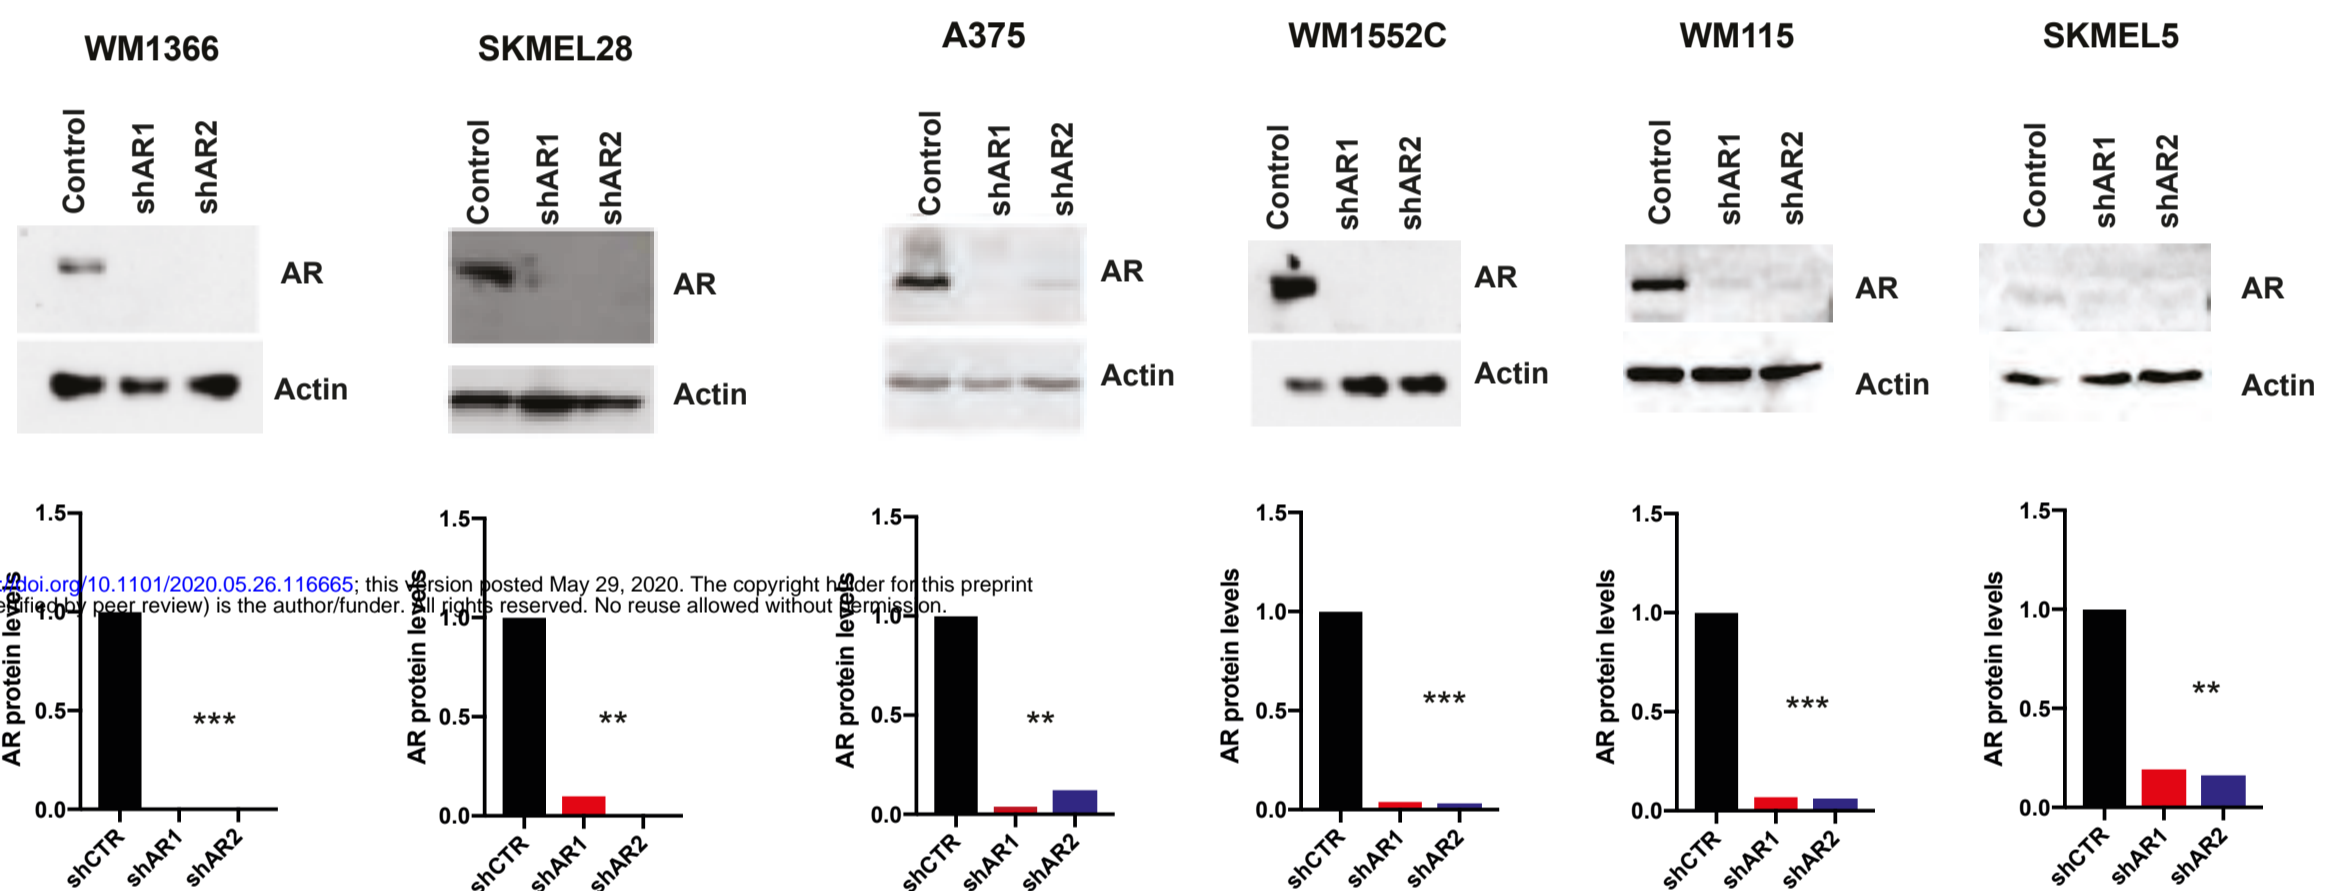

bioRxiv preprint doi: <https://doi.org/10.1101/2020.05.26.116665>; this version posted May 29, 2020. The copyright holder for this preprint (which was not certified by peer review) is the author/funder, who has granted bioRxiv a license to display the preprint in perpetuity. It is made available under aCC-BY 4.0 International license.

**Supplementary Figure 7. Related to Figure 2A-F. Silencing of AR in different melanoma cell lines.** A) Down-modulation of AR expression in a panel of melanoma cell lines and primary melanoma cells (M121008, MM131206, MM141022) infected with 2 AR silencing lentiviruses versus empty control (5 days after infection) was assessed by RT-qPCR. Data are shown as mean  $\pm$  SD, 1-way ANOVA with Dunnett's test.  $n = 3$  biological replicates (experiments). \* $P < 0.05$ ; \*\*  $P < 0.01$ ; \*\*\* $P < 0.005$ ; \*\*\*\* $P < 0.001$ . B) Immunoblot analysis of AR protein expression in different melanoma cell lines plus/minus AR gene silencing as in previous panel. Shown are the immunoblots together with the corresponding quantification of AR protein levels after densitometric scanning of the autoradiographs, utilizing actin signal for normalization (lower panels).

# Supplementary Figure 8

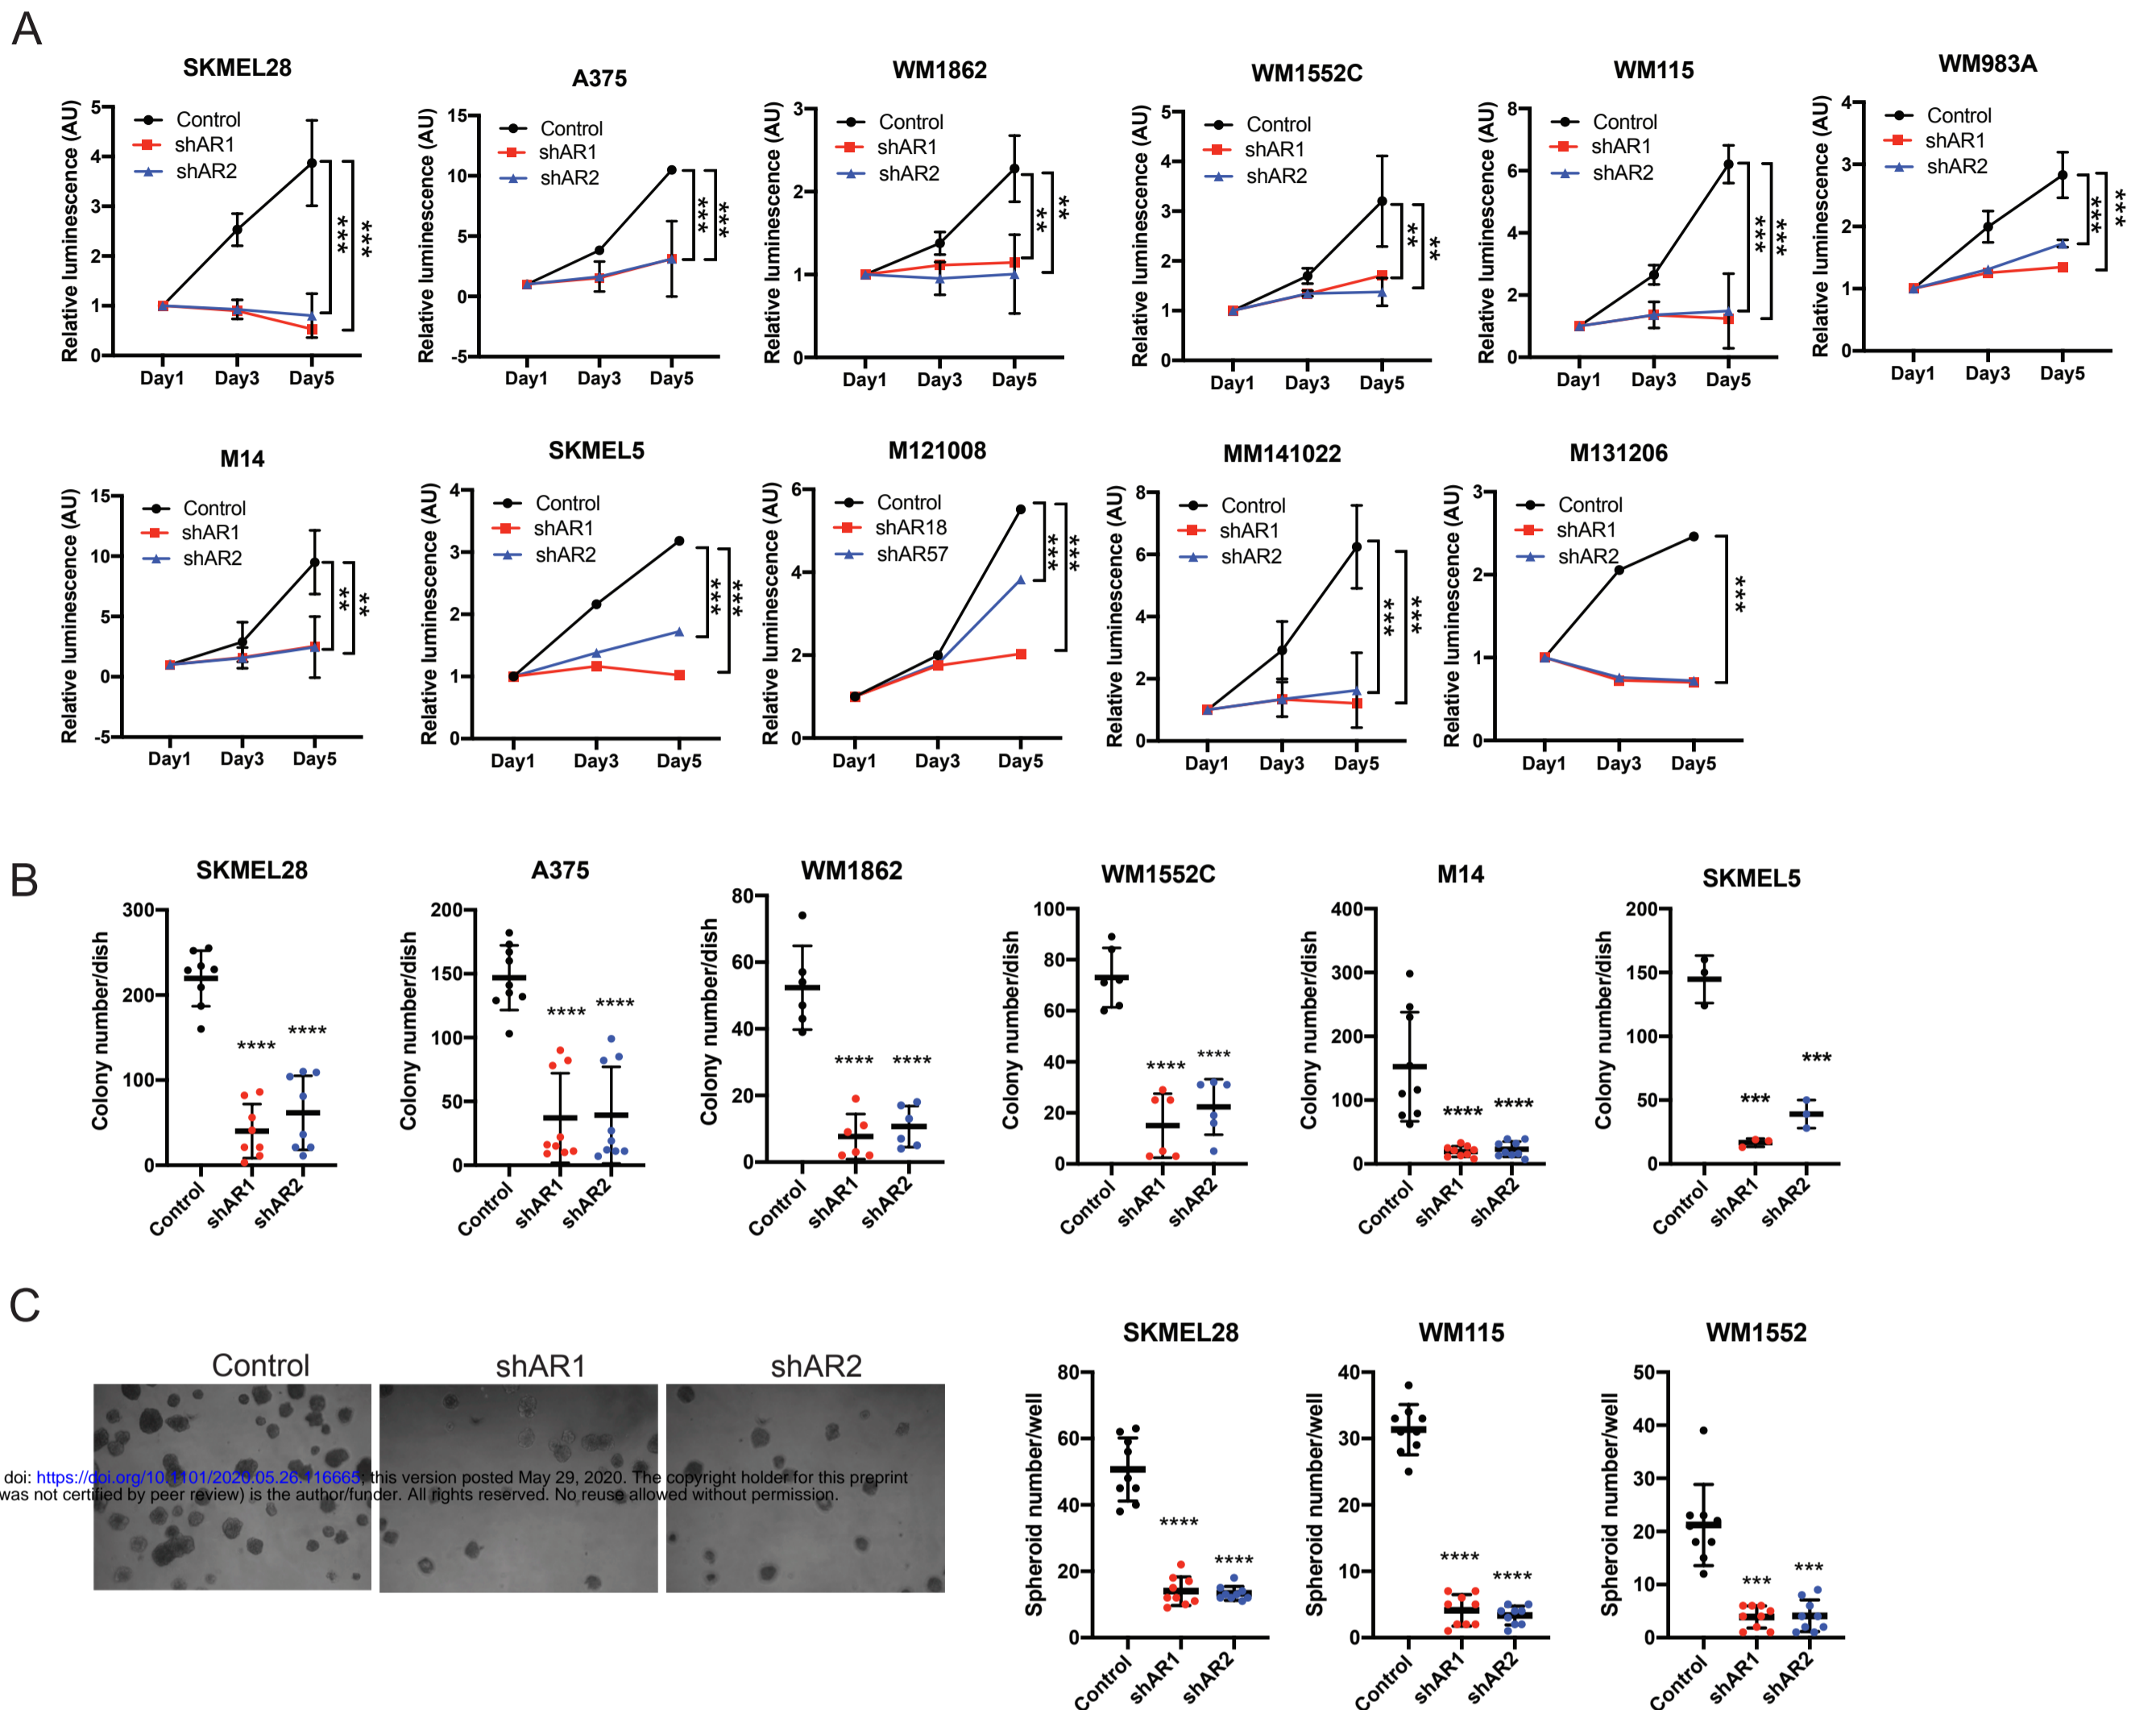

**Supplementary Figure 8. Related to Figure 2A-C. Suppression of melanoma proliferation and self-renewal potential by AR silencing.** A) Cell density assays (CellTiter-Glo) were carried out with the indicated melanoma cell lines and primary melanoma cells (M121008, MM131206, MM141022) infected with two AR silencing lentiviruses versus empty vector control. Results are presented as luminescence intensity values relative to day 1. B, C) Colony and sphere formation assays with indicated melanoma cell lines plus/minus AR silencing. Shown are the results of 3 independent experiments quantifying in each case 3 dishes per conditions (indicated by dots, mean  $\pm$  SD). Results are presented as mean  $\pm$  SD, 1-way ANOVA with Dunnett's test. n = 3 biological replicates (experiments). \*\* P < 0.01; \*\*\*P < 0.005; \*\*\*\* < 0.001.

# Supplementary Figure 9

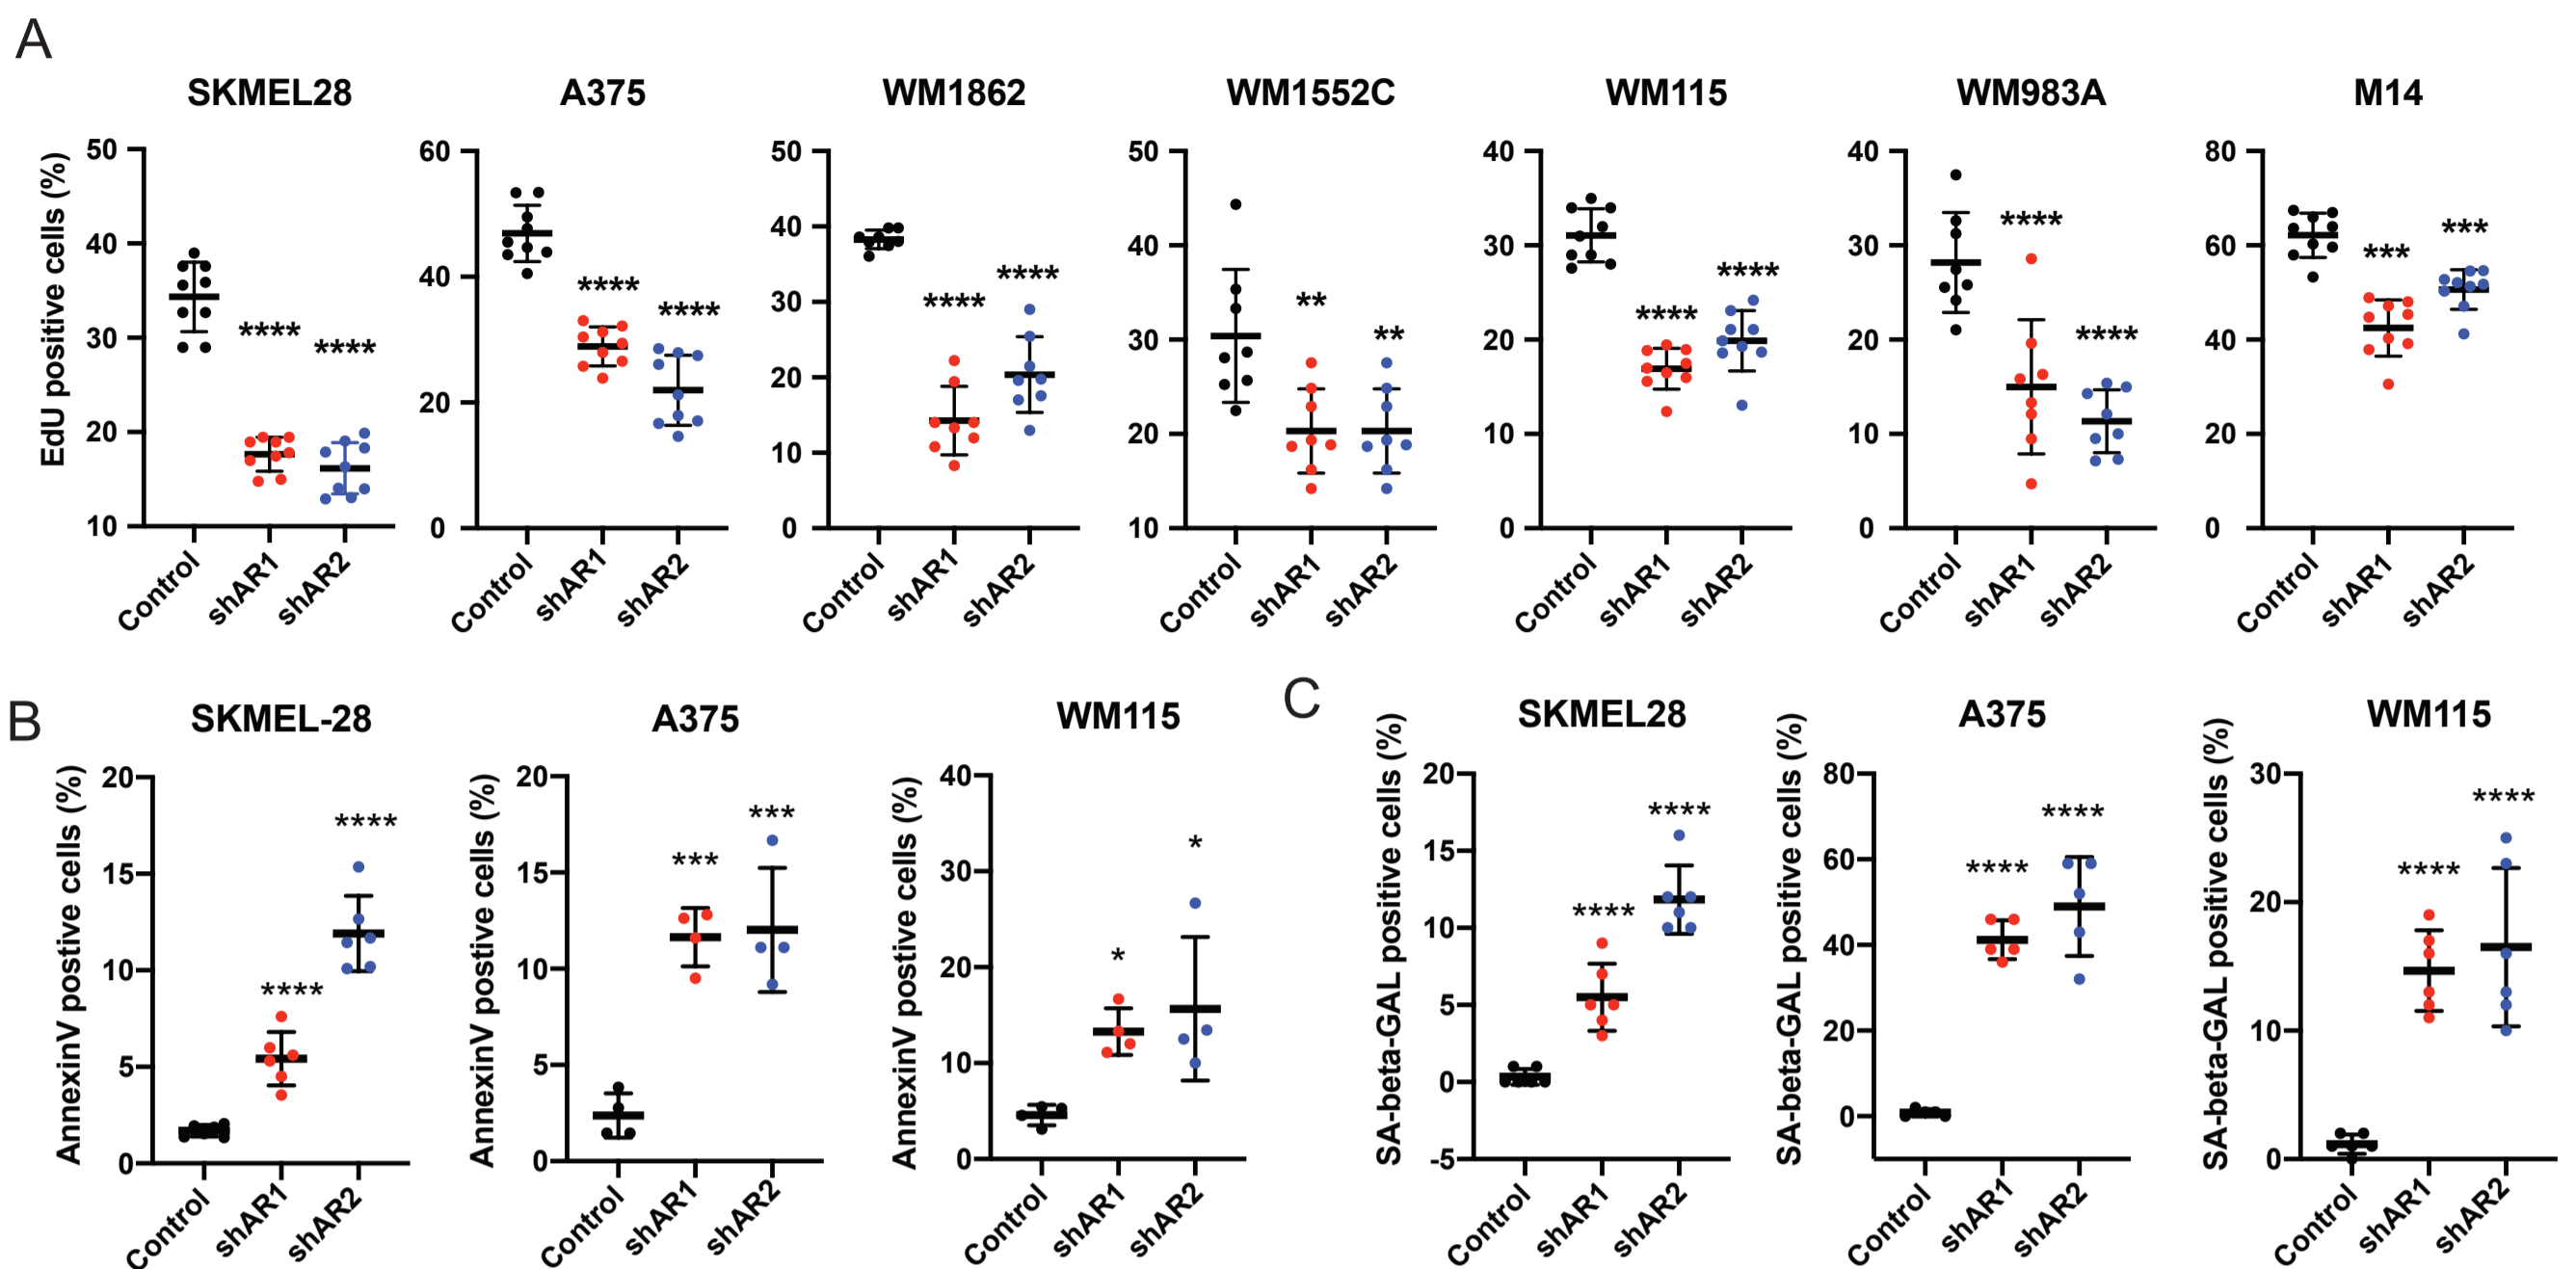

**Supplementary Figure 9. Related to Figure 2D-F. EdU incorporation, apoptosis and senescence assays in melanoma cells plus/minus AR silencing.** Indicated melanoma cell lines infected with two AR silencing lentiviruses versus empty vector control were tested by EdU labelling assay (A), AnnexinV staining (B) and senescence-associated beta-GAL staining (C) 5 days post virus infection. AnnexinV/SA beta-GAL positive cells were counted using ImageJ software. Shown are representative images and results of 3 independent experiments quantifying in each case 3 dishes per conditions (indicated by dots, mean  $\pm$  SD), 1-way ANOVA with Dunnett's test. n = 3 biological replicates (experiments). \*P < 0.05; \*\* P < 0.01; \*\*\*P < 0.005, \*\*\*\*P < 0.001.

# Supplementary Figure 10

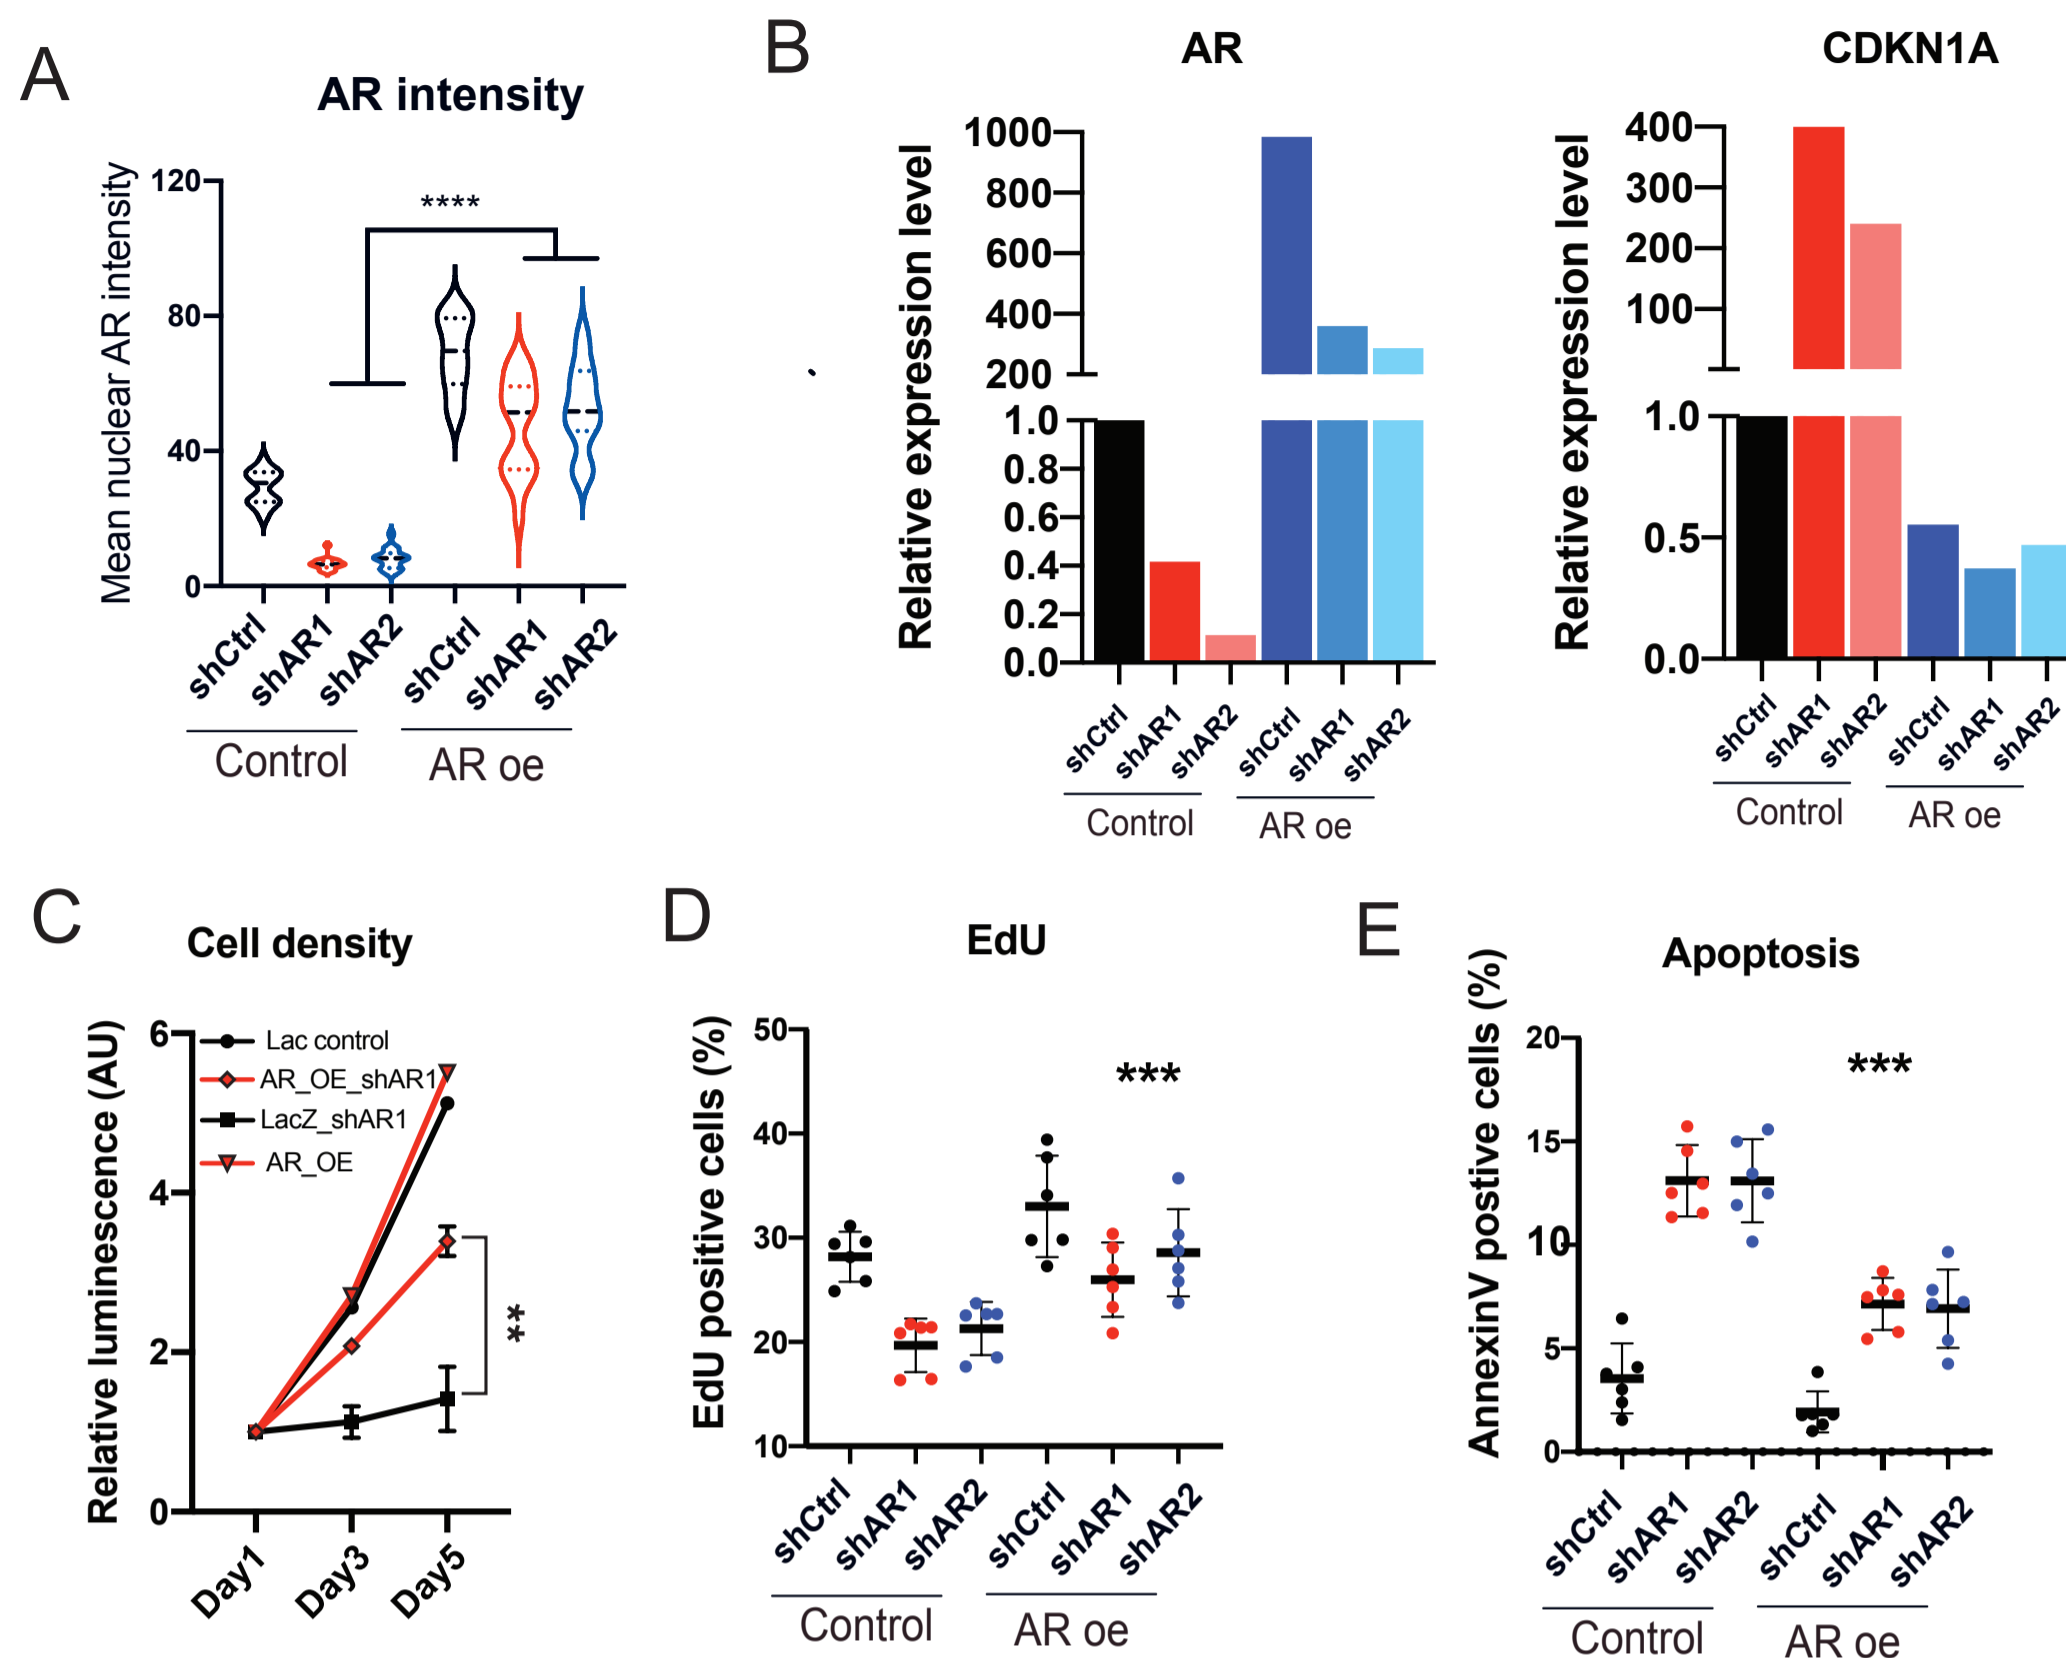

## Supplementary Figure 10. Related to Figure 2G. Concomitant AR overexpression suppresses AR silencing effects.

bioRxiv preprint doi: <https://doi.org/10.1101/2020.05.26.116865>; this version posted May 29, 2020. The copyright holder for this preprint (which was not certified by peer review) is the author/funder. All rights reserved. No reuse allowed without permission.

A) Quantification of AR protein expression by immunofluorescence analysis of A375 cells stably infected with a lentiviral vector for constitutive AR expression versus LacZ control and superinfected with two AR silencing lentiviruses versus vector control for 5 days. Shown is a violin plot quantification of AR immunofluorescence signal intensity, with corresponding representative images shown in Fig. 2G.  $n$  (cells per condition)  $> 20$ , 1-way ANOVA with Dunnett's test, \*\*\*\* $P < 0.001$ . B) Quantification of AR mRNA expression by RT-qPCR analysis of A375 cells plus/minus AR overexpression and silencing as in the previous panel. Same samples were analyzed for levels of *CDKN1A* expression as a marker/effector of cellular senescence induced by AR gene silencing. C) Proliferation live-cell imaging assays of A375 cells plus/minus AR overexpression and silencing as in the previous panel. Cells were plated in triplicate wells in 96-well plate followed by cell density measurements ((IncuCyte™ system, Essen Instruments; 4 images per well every 4 hours for 128 hours).  $n$  (number of wells) = 3, Pearson  $r$  correlation test. \*\*  $P < 0.01$ . D, E) Same melanoma cell as in the previous panels were tested by EdU labelling assay (D) or apoptosis by annexin V staining (E). For each condition, cells were tested in duplicated dishes, with all experiments repeated 3 times. Data are shown as mean  $\pm$  SD, 1-way ANOVA with Dunnett's test.  $n = 3$  independent experiments. \*\* $P < 0.01$ . \*\*\*  $P < 0.005$ .

# Supplementary Figure 11

A

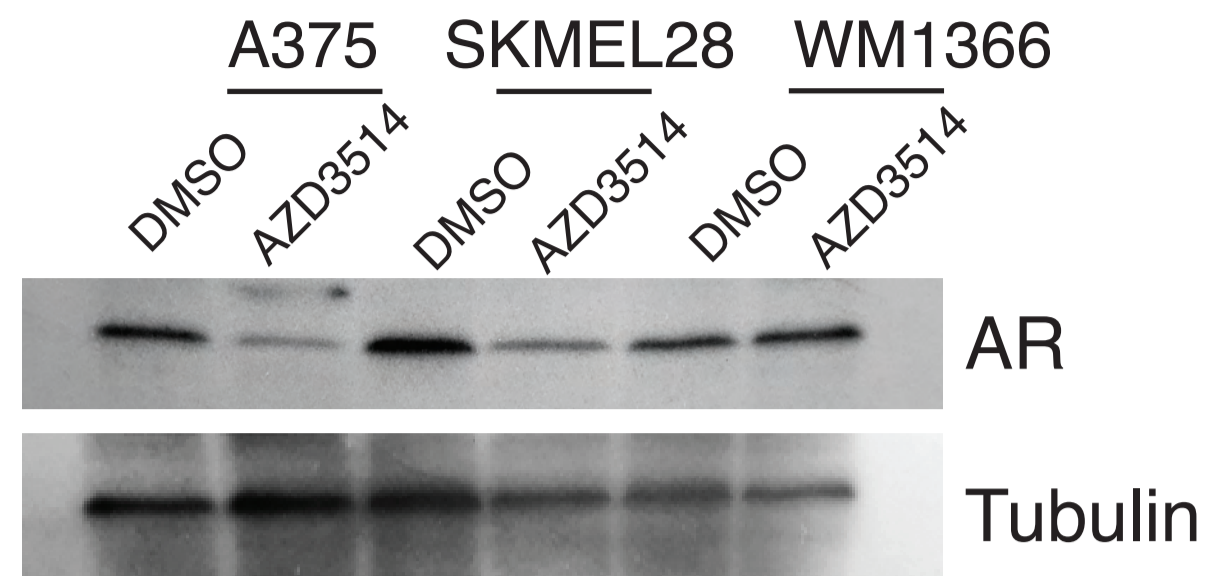

B

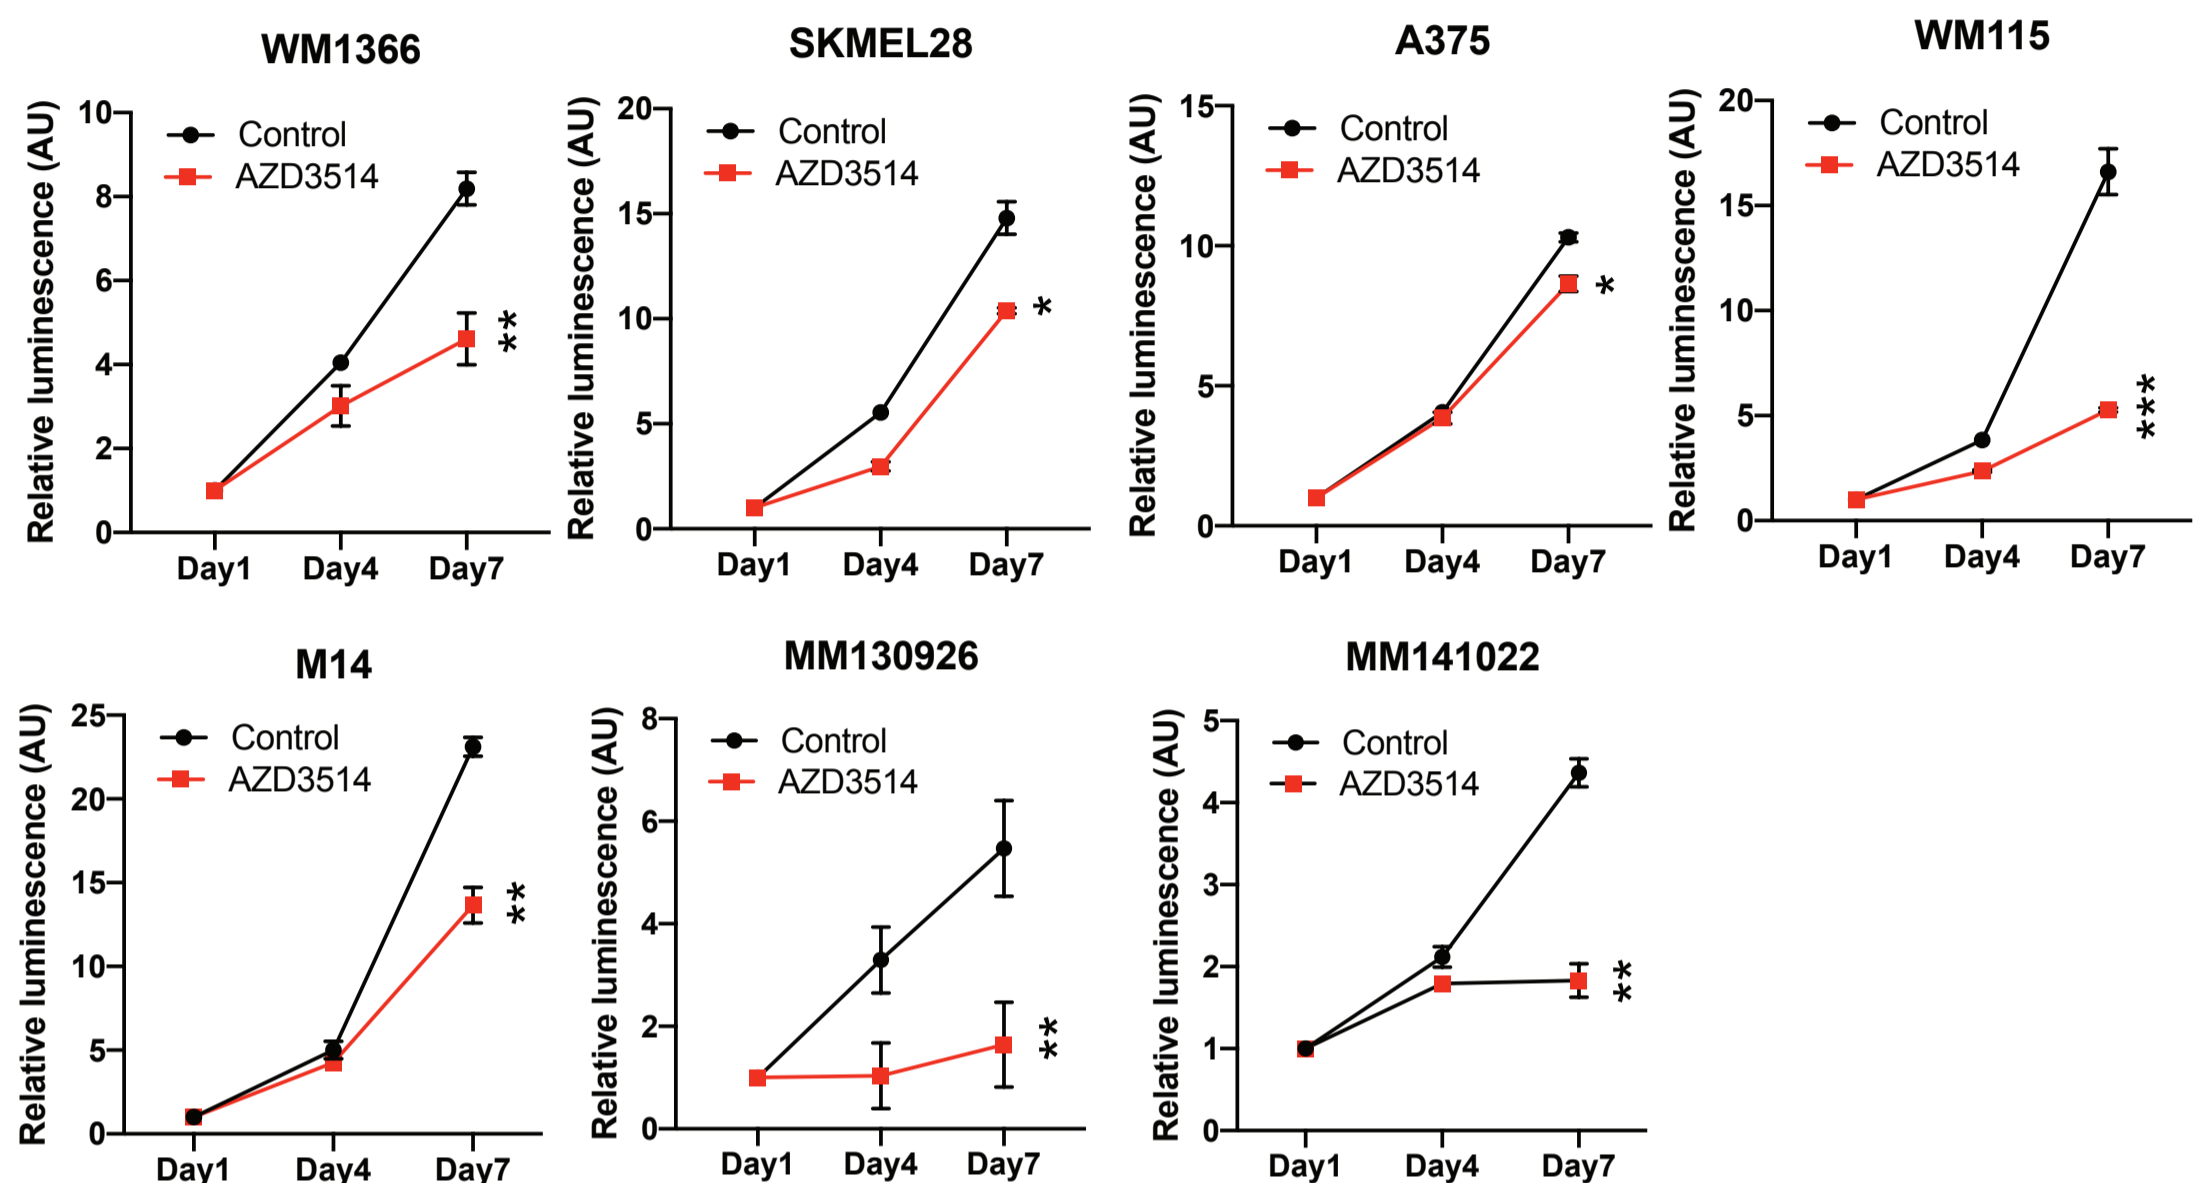

bioRxiv preprint doi: <https://doi.org/10.1101/2020.05.26.116665>; this version posted May 29, 2020. The copyright holder for this preprint (which was not certified by peer review) is the author/funder. All rights reserved. No reuse allowed without permission.

C

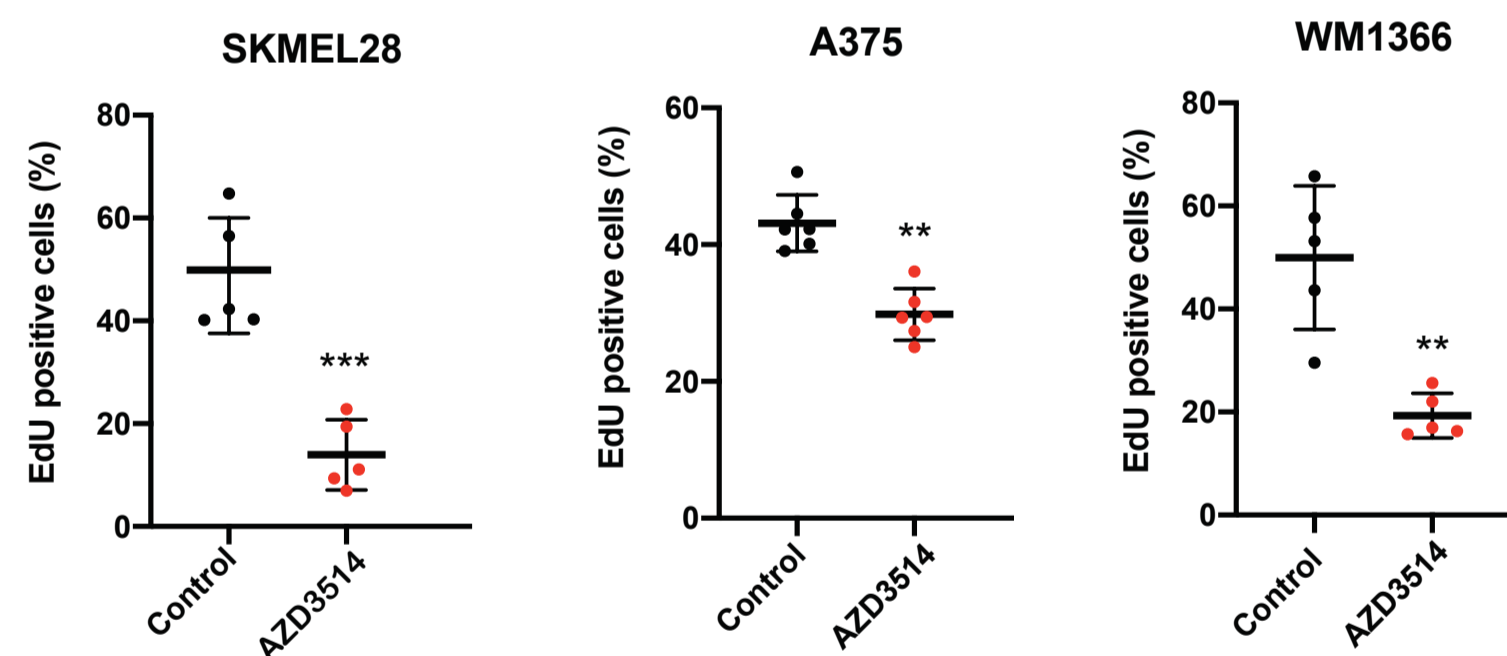

**Supplementary Figure 11. Related to Figure 3B-D. Growth suppressive effects of AR inhibitors on melanoma cells.** A) Immunoblot analysis of AR protein expression in the indicated melanoma cell lines treated with AZD3514 (10  $\mu$ M for 48 hours) versus DMSO control. B) Cell density assays (CellTiter-Glo) of the indicated melanoma cell lines and primary melanoma cells (MM130926, MM141022) treated with AZD3514 (10  $\mu$ M) versus solvent control (DMSO). Cells were plated on triplicate wells in 96-well dishes followed by cell density / metabolic activity measurements at the indicated days after treatment. Results are presented as luminescence intensity values relative to day 1. C) EdU labelling assays of the indicated melanoma cells treated with AZD3514 (10  $\mu$ M) versus solvent control (DMSO) at day 5 after treatment. Data are shown as mean  $\pm$  SD, 1-way ANOVA with Dunnett's test. n = 3 biological replicates (experiments). \*P < 0.05; \*\* P < 0.01; \*\*\*P < 0.005.

# Supplementary Figure 12

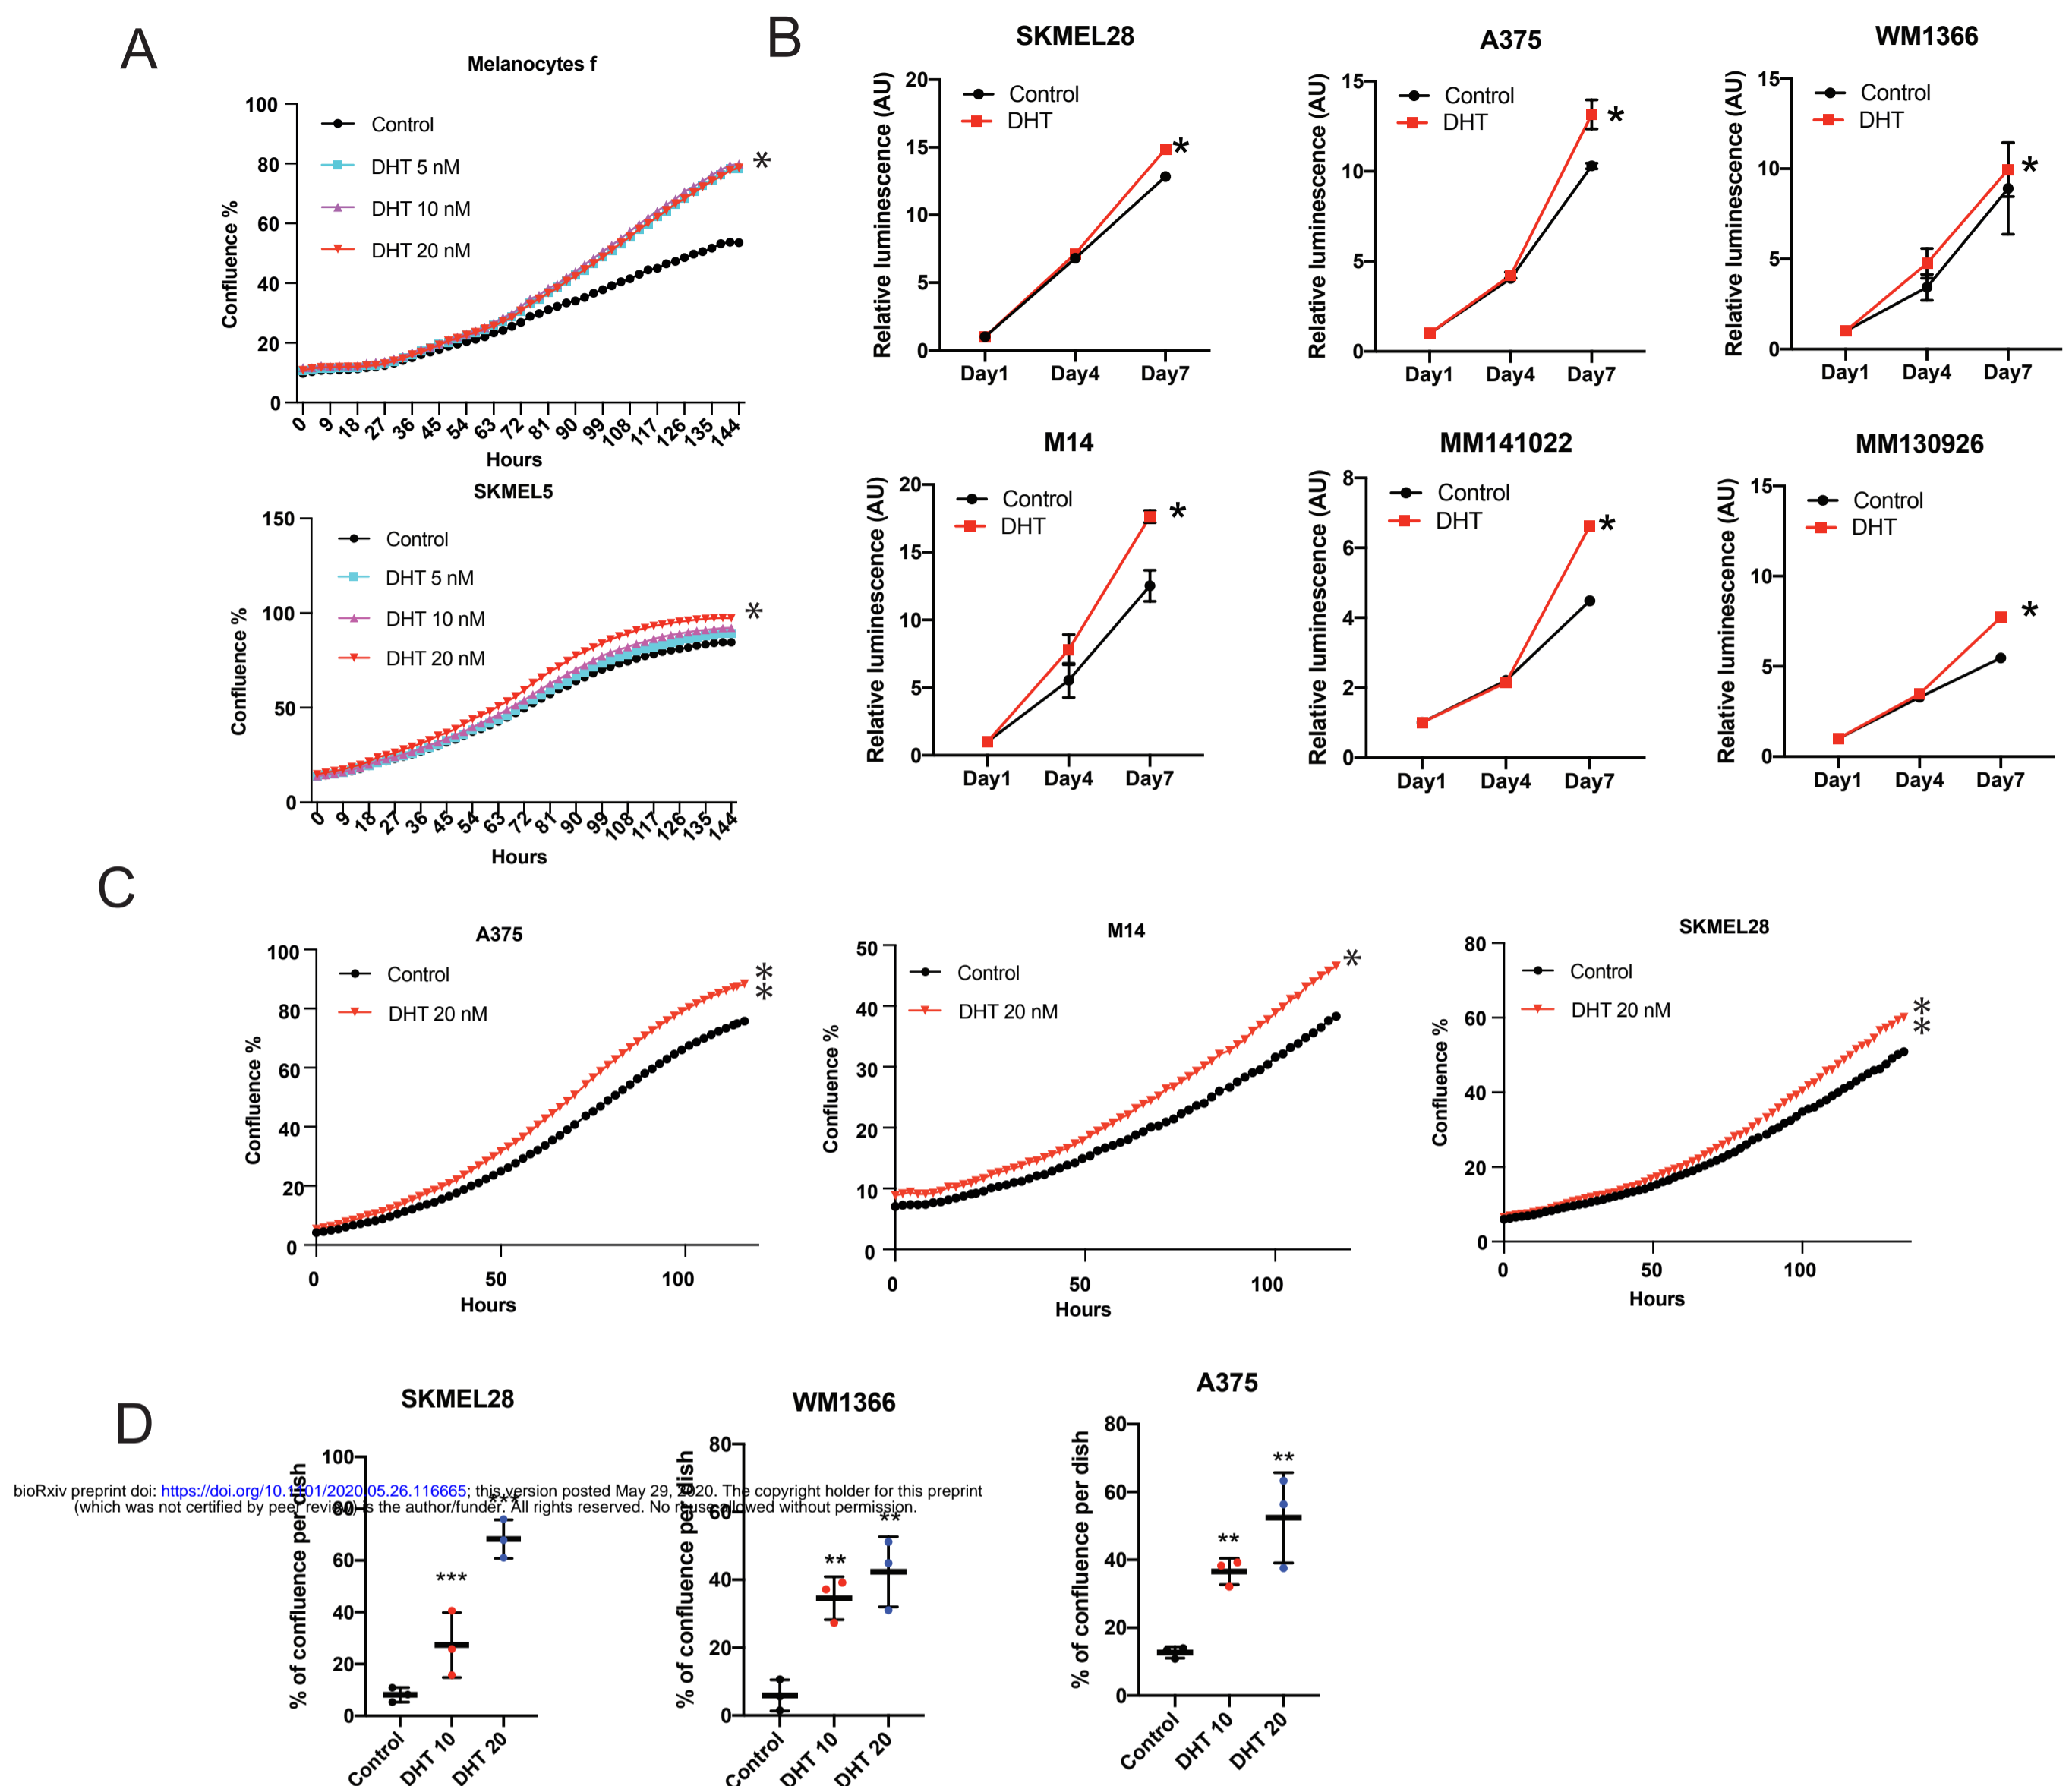

**Supplementary Figure 12. Related to Figure 3E, F. Growth stimulatory effects of dihydrotestosterone (DHT) treatment of melanoma cells.** A) Proliferation live-cell imaging assays of the primary melanocytes (strain f) and SKMEL5 melanoma cells treated with the different doses of DHT (5, 10, 20 nM) versus DMSO control by live-cell imaging. Cells cultured in medium with charcoal-treated serum were plated in triplicate wells in 96-well plates followed by cell imaging measurements (IncuCyte™ system, Essen Instruments), capturing 4 images per well every 4 hours for the indicated number of hours. n (number of wells) = 3, Pearson r correlation test. \*P < 0.05; B) Cell density assays of the indicated melanoma cell lines and primary melanoma cells (MM130926, MM141022) treated with the AR agonist DHT (20 nM) versus solvent control (DMSO). Cells cultured in medium with charcoal-treated serum were plated on triplicate wells in 96-well dishes followed by cell density / metabolic activity measurements (CellTiter-Glo) at the indicated days after treatment. Results are presented as luminescence intensity values relative to day 1. C) Proliferation live-cell imaging assays of the indicated melanoma cells treated with the DHT (20 nM) versus DMSO control. Assay conditions were as in (A). n (number of wells) = 3, Pearson r correlation test. \*P < 0.05; \*\* P < 0.01. D) Cell density assays of the indicated melanoma cells tested under very sparse condition. Cells were cultured in medium with charcoal-treated serum for 48 hours followed by plating at very low numbers (500 cells in 60 mm-dish) in the same medium plus/minus treatment with DHT (10 and 20 nM) versus solvent control (DMSO) for 7 days. Data are represented as relative cell density as quantified by ImageJ analysis of crystal violet stained dishes. 1-way ANOVA with Dunnett's test. n = 3 independent experiments. \*P < 0.05; \*\* P < 0.01; \*\*\*P < 0.005. All the DHT treatment experiments were carried out in charcoal-stripped medium.



# Supplementary Figure 13

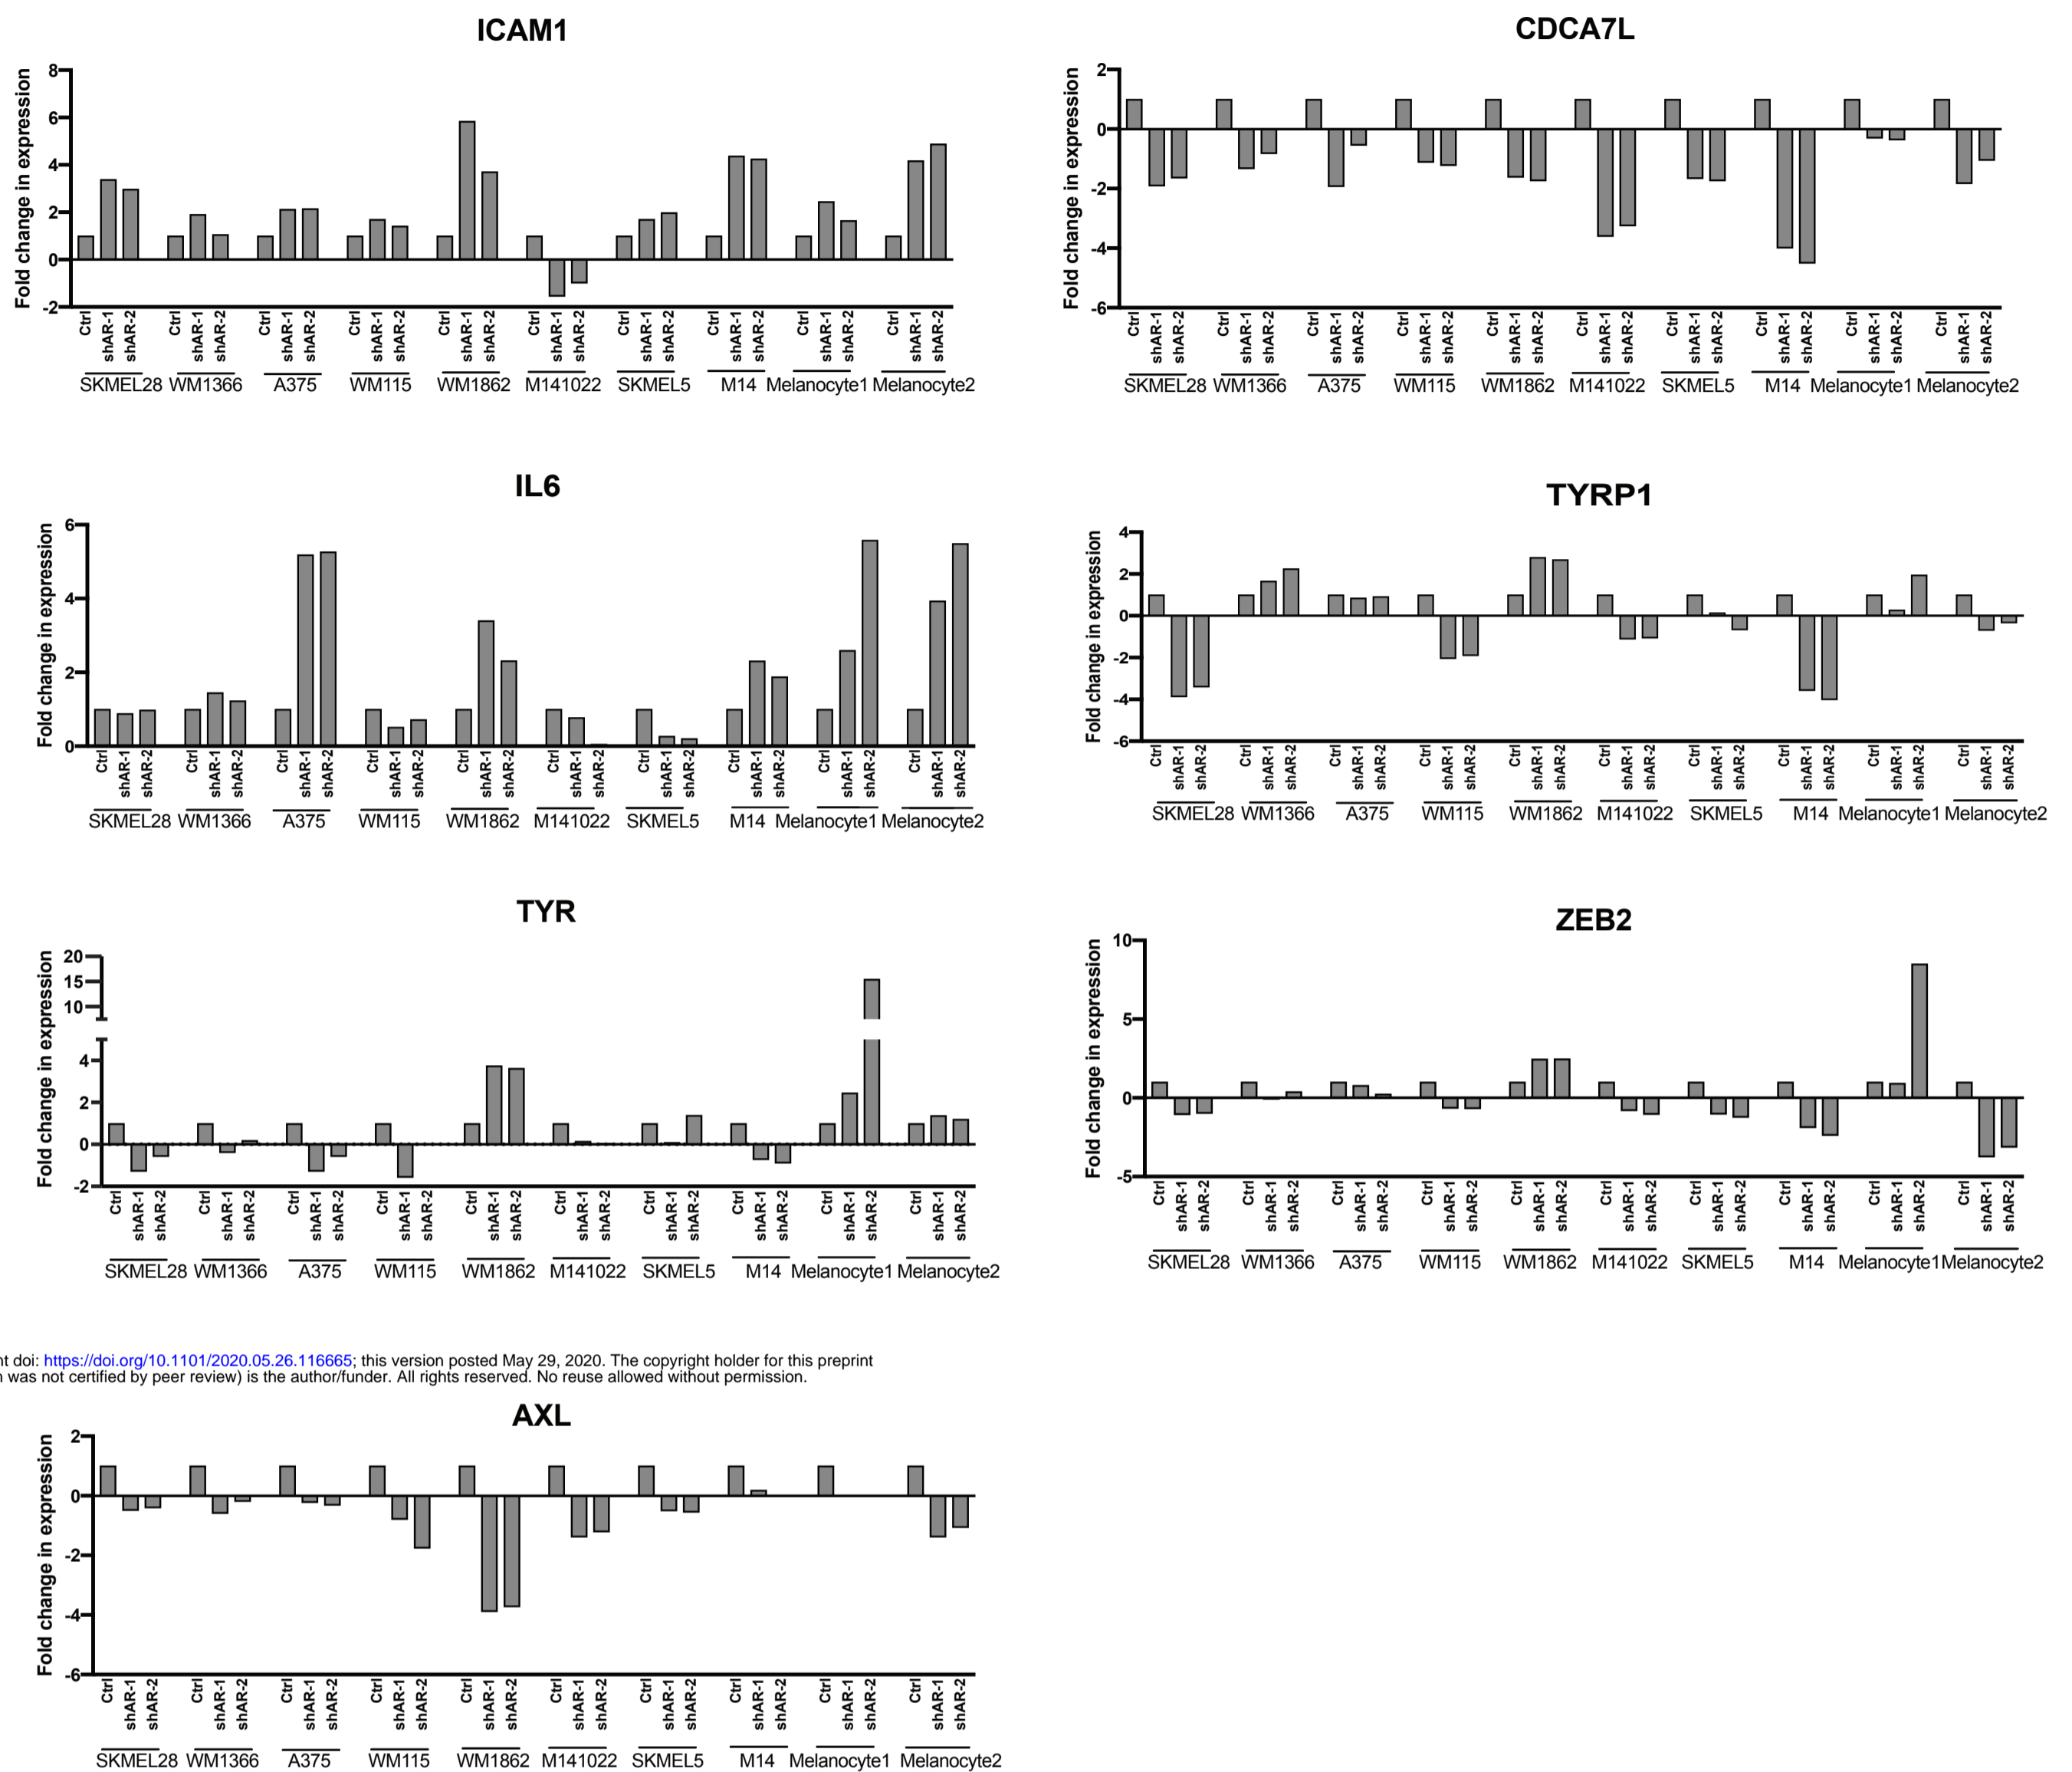

bioRxiv preprint doi: <https://doi.org/10.1101/2020.05.26.116665>; this version posted May 29, 2020. The copyright holder for this preprint (which was not certified by peer review) is the author/funder. All rights reserved. No reuse allowed without permission.

**Supplementary Figure 13. Related to Figure 4B. Impact on melanoma cells gene expression of AR gene silencing.** Expression of the indicated genes of interest in a panel of melanoma cell lines, primary melanoma (M141022) and primary melanocytes infected with two AR silencing lentiviruses versus empty vector control, was assessed by RT-qPCR with RPLP0 for normalization. Data, shown as individual plots per cell line, correspond to those shown as heat map in Fig. 4B.

# Supplementary Figure 14

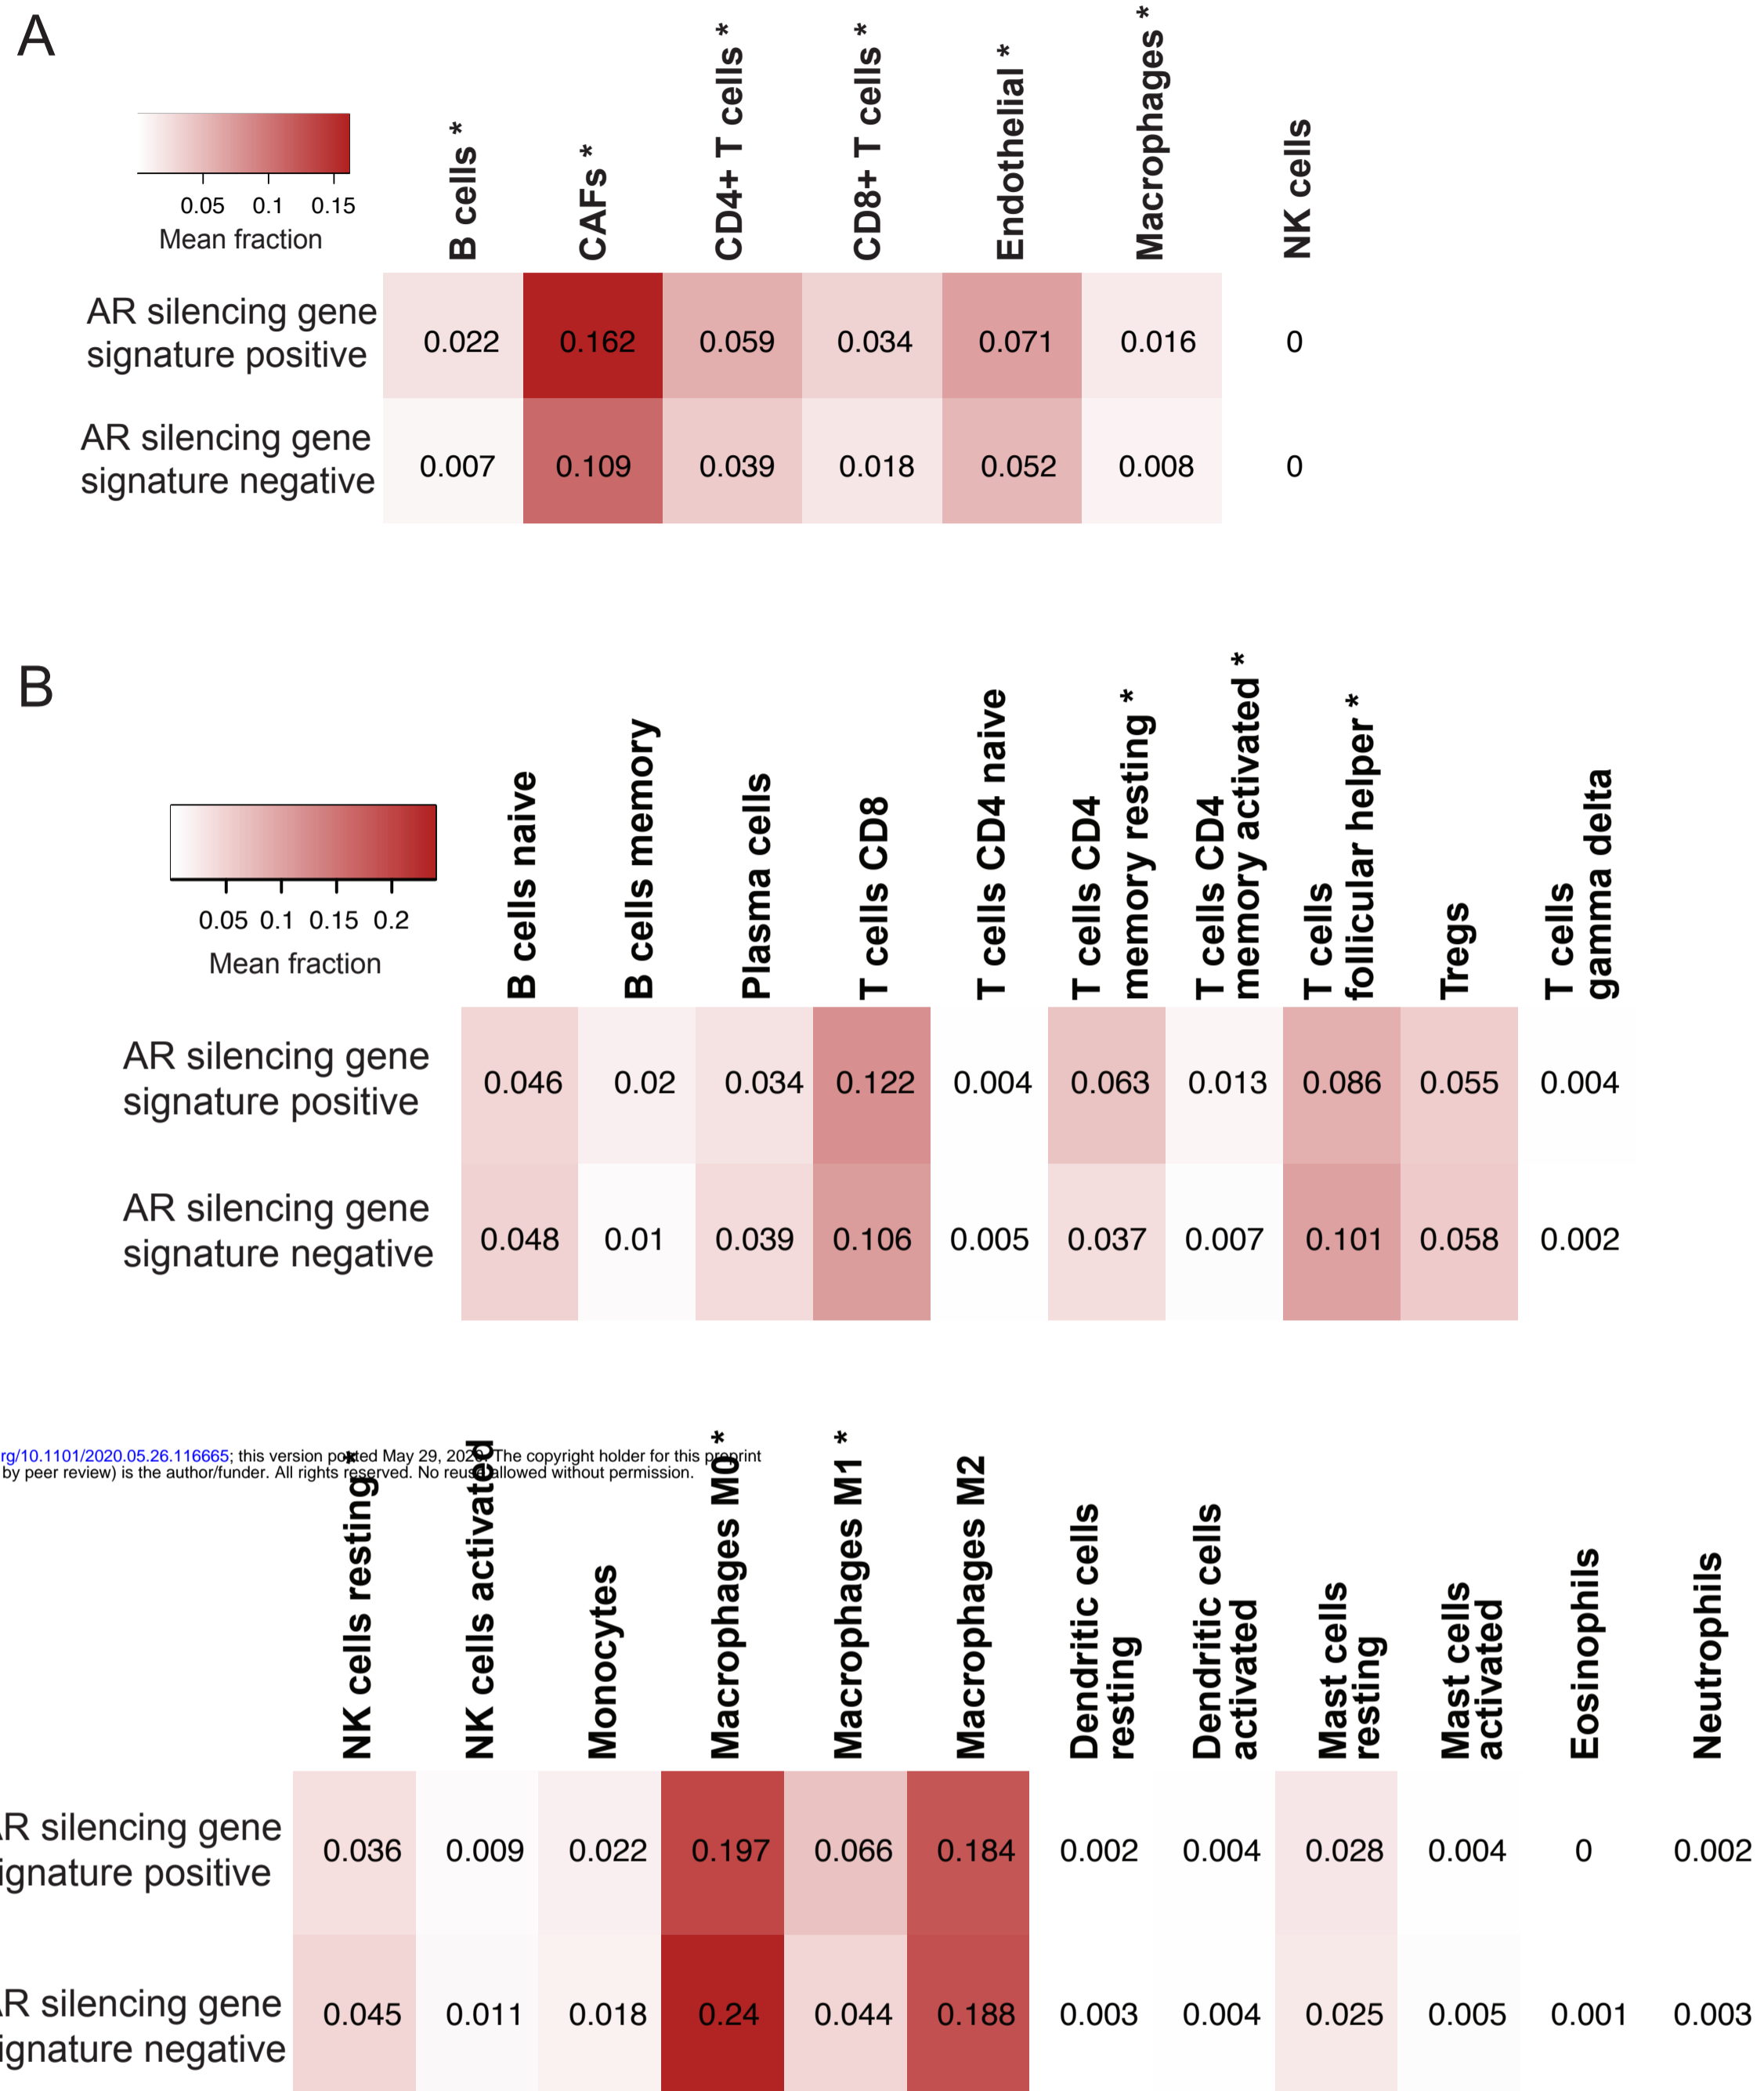

**Supplementary Figure 14. Related to Figure 4E. Prevalence of stromal and immune cells in TCGA-SKCM samples with and without enrichment for the AR silencing gene signature.** Heatmaps reporting mean fractions of stromal and immune cell types (columns) for TCGA-SKCM samples with AR silencing signature up or down (rows) obtained using EPIC (A) and CIBERSORTx (B). Red intensity is proportional to the mean cell fraction, which is also reported in each entry. Cell types showing a significantly different prevalence (Wilcoxon rank-sum test, Bonferroni-adjusted p-value < 0.05) between samples with AR silencing signature up or down are highlighted with a “\*”.

## Supplementary Figure 15

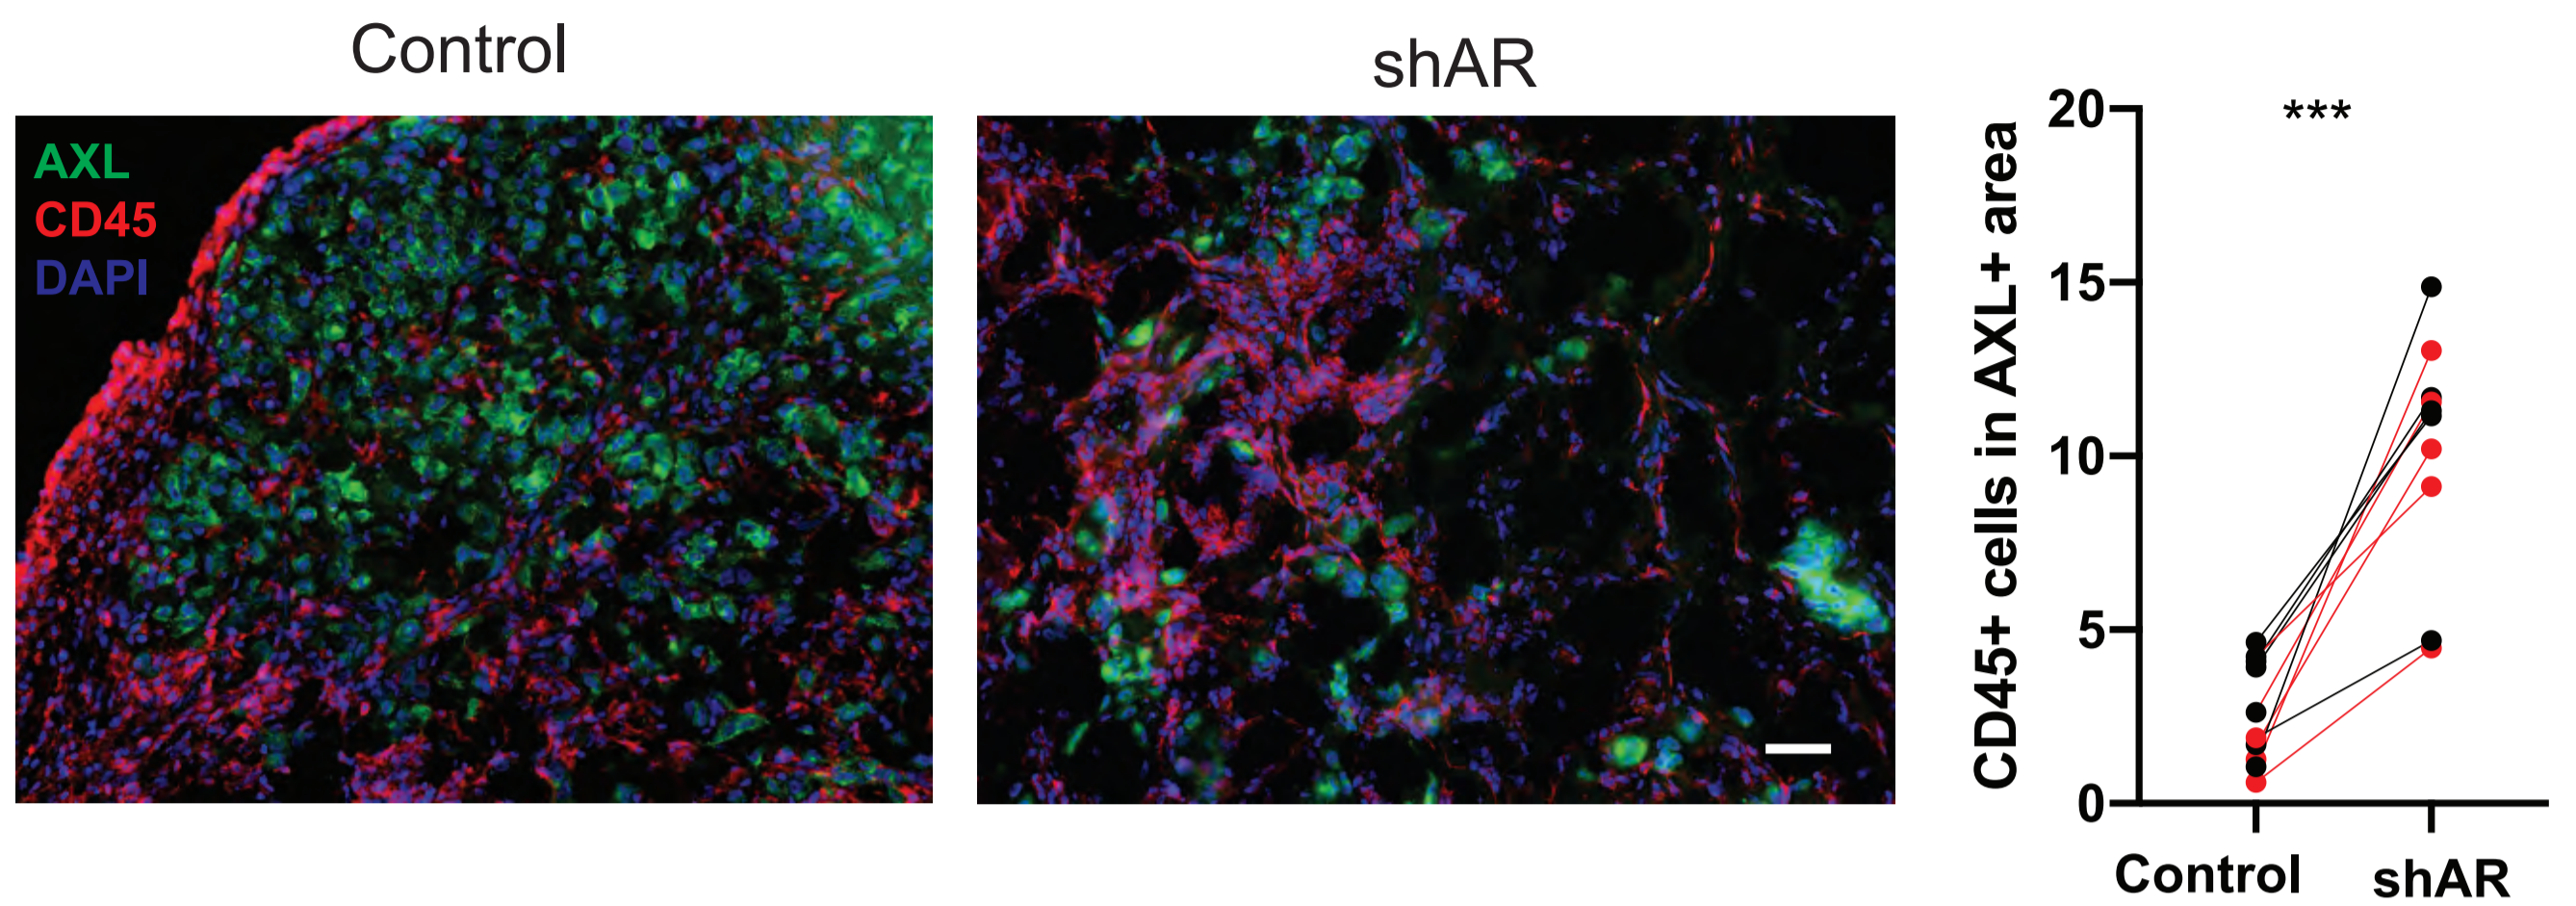

**Supplementary Figure 15. Related to Figure 7. AR silencing inhibits WM1366 melanoma tumorigenesis.** Double immunofluorescence analysis of lesions from Figure 7A with antibodies against AXL, for melanoma cells identification and CD45 positive cells. Shown is the quantification together with representative images of CD45 positive cells per AXL positive tumor area, counting in each 5 fields, 5 male mice and 5 female mice, data of male mice in red. Scale bar: 20  $\mu$ m.

# Supplementary Figure 16

A

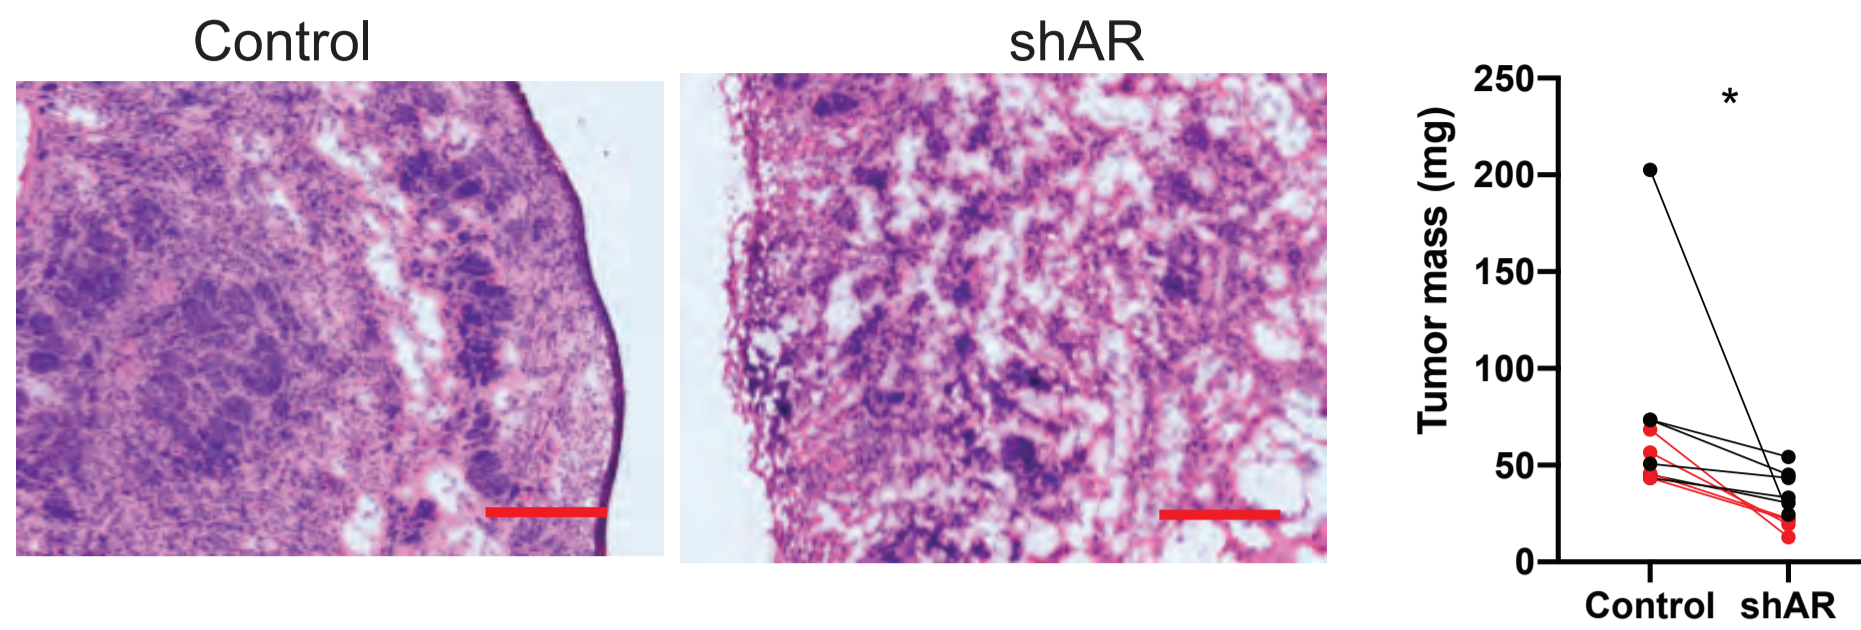

B

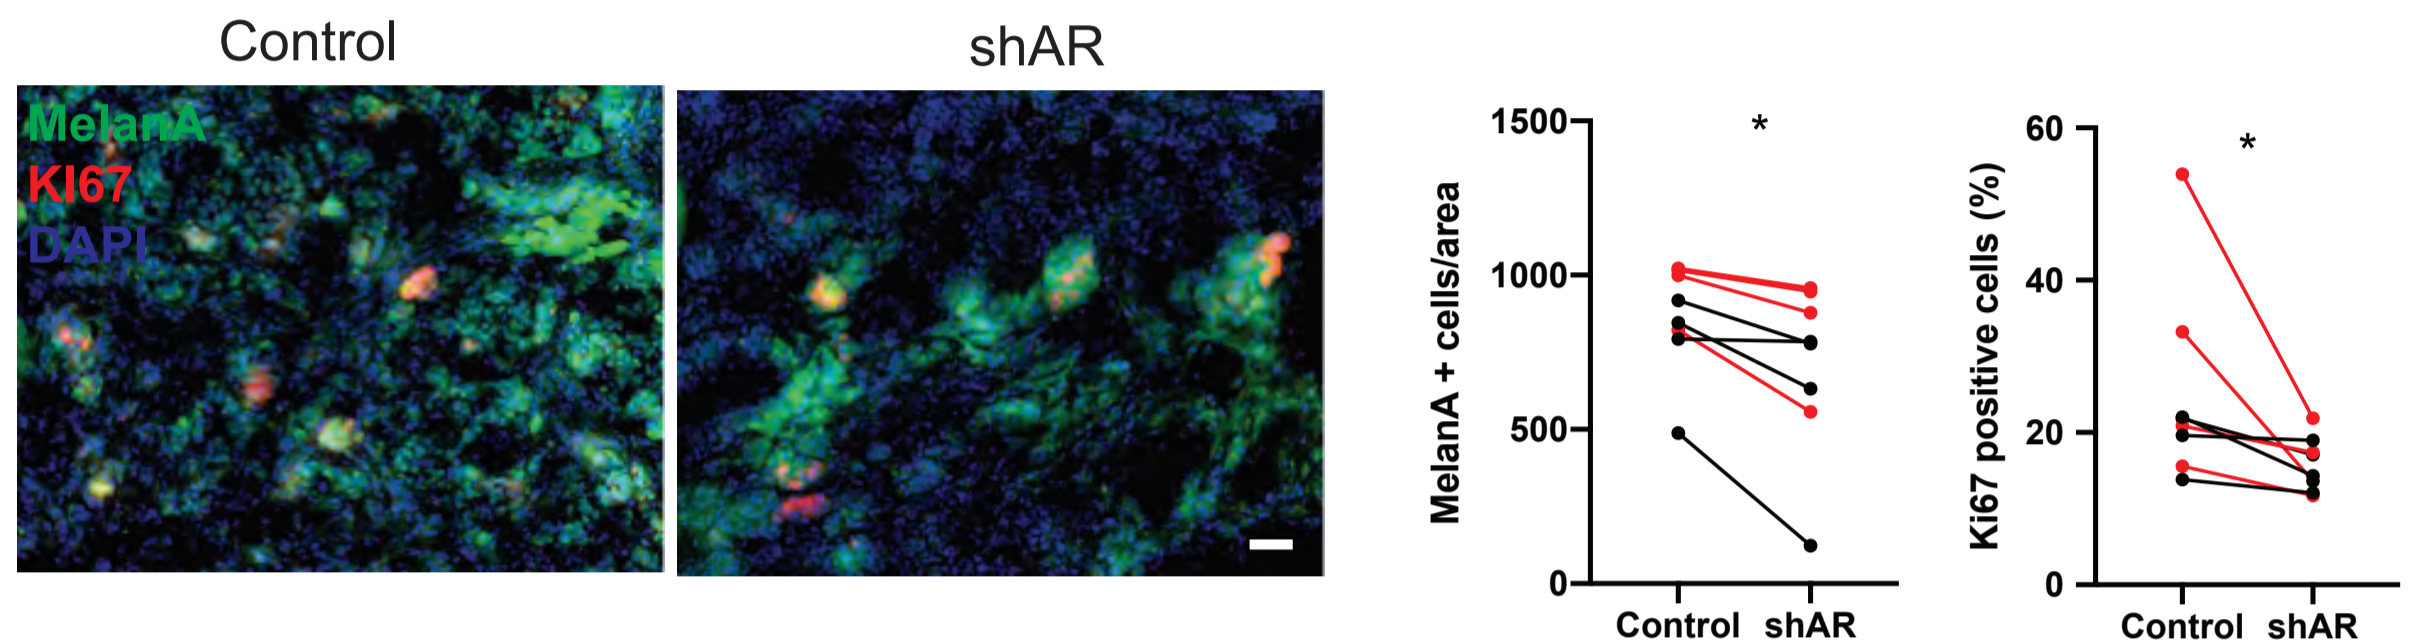

C

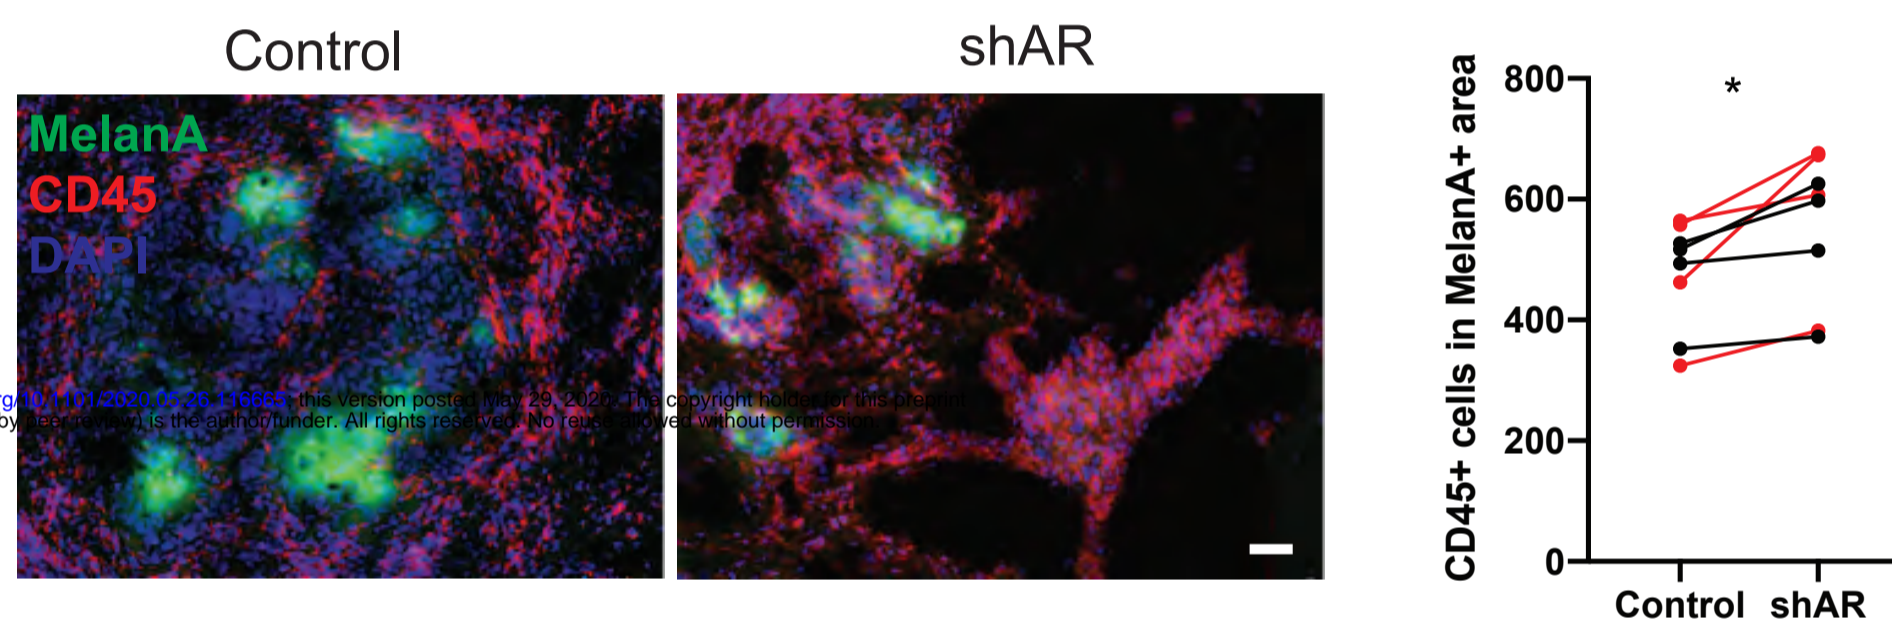

bioRxiv preprint doi: <https://doi.org/10.1101/2020.05.26.118685>; this version posted May 29, 2020. The copyright holder for this preprint (which was not certified by peer review) is the author/funder. All rights reserved. No reuse allowed without permission.

**Supplementary Figure 16. Related to Figure 7. AR silencing inhibits A375 melanoma tumorigenesis.** A375 melanoma cells infected with an AR-silencing virus versus vector control were tested by parallel intradermal Matrigel injections into NOD/SCID male and female mice (5 per group, data of male mice in red). Mice were sacrificed 16 days after injection. A) Tumor size, measured by digital caliper (mass = (length x width x height) \*  $\pi/6$ ) together with representative low magnification H/E images of the retrieved lesions. B) Double immunofluorescence analysis of lesions with antibodies against MelanA (green), for melanoma cells identification, and KI67 (B) positive cells. Shown are representative images of MelanA positive cells stained with antibodies against the other markers, together with relative quantification, (counting in each case >50 cells in 3-5 fields on digitally-retrieved images, using ImageJ software). C) double immunofluorescence analysis of lesions with antibodies against MelanA, CD45 and F4/80, for melanoma cells, hematopoietic cells as well as macrophages identification, respectively. Shown are representative images together with quantification of number of F4/80 positive cells per MelanA positive tumor area, counting in each case 3-4 fields. n (control versus experimental lesions) = 20, two-tailed paired t test, \*P < 0.05; \*\* P < 0.01; \*\*\*P < 0.005. Scale bars: 10  $\mu$ m.

# Supplementary Figure 17

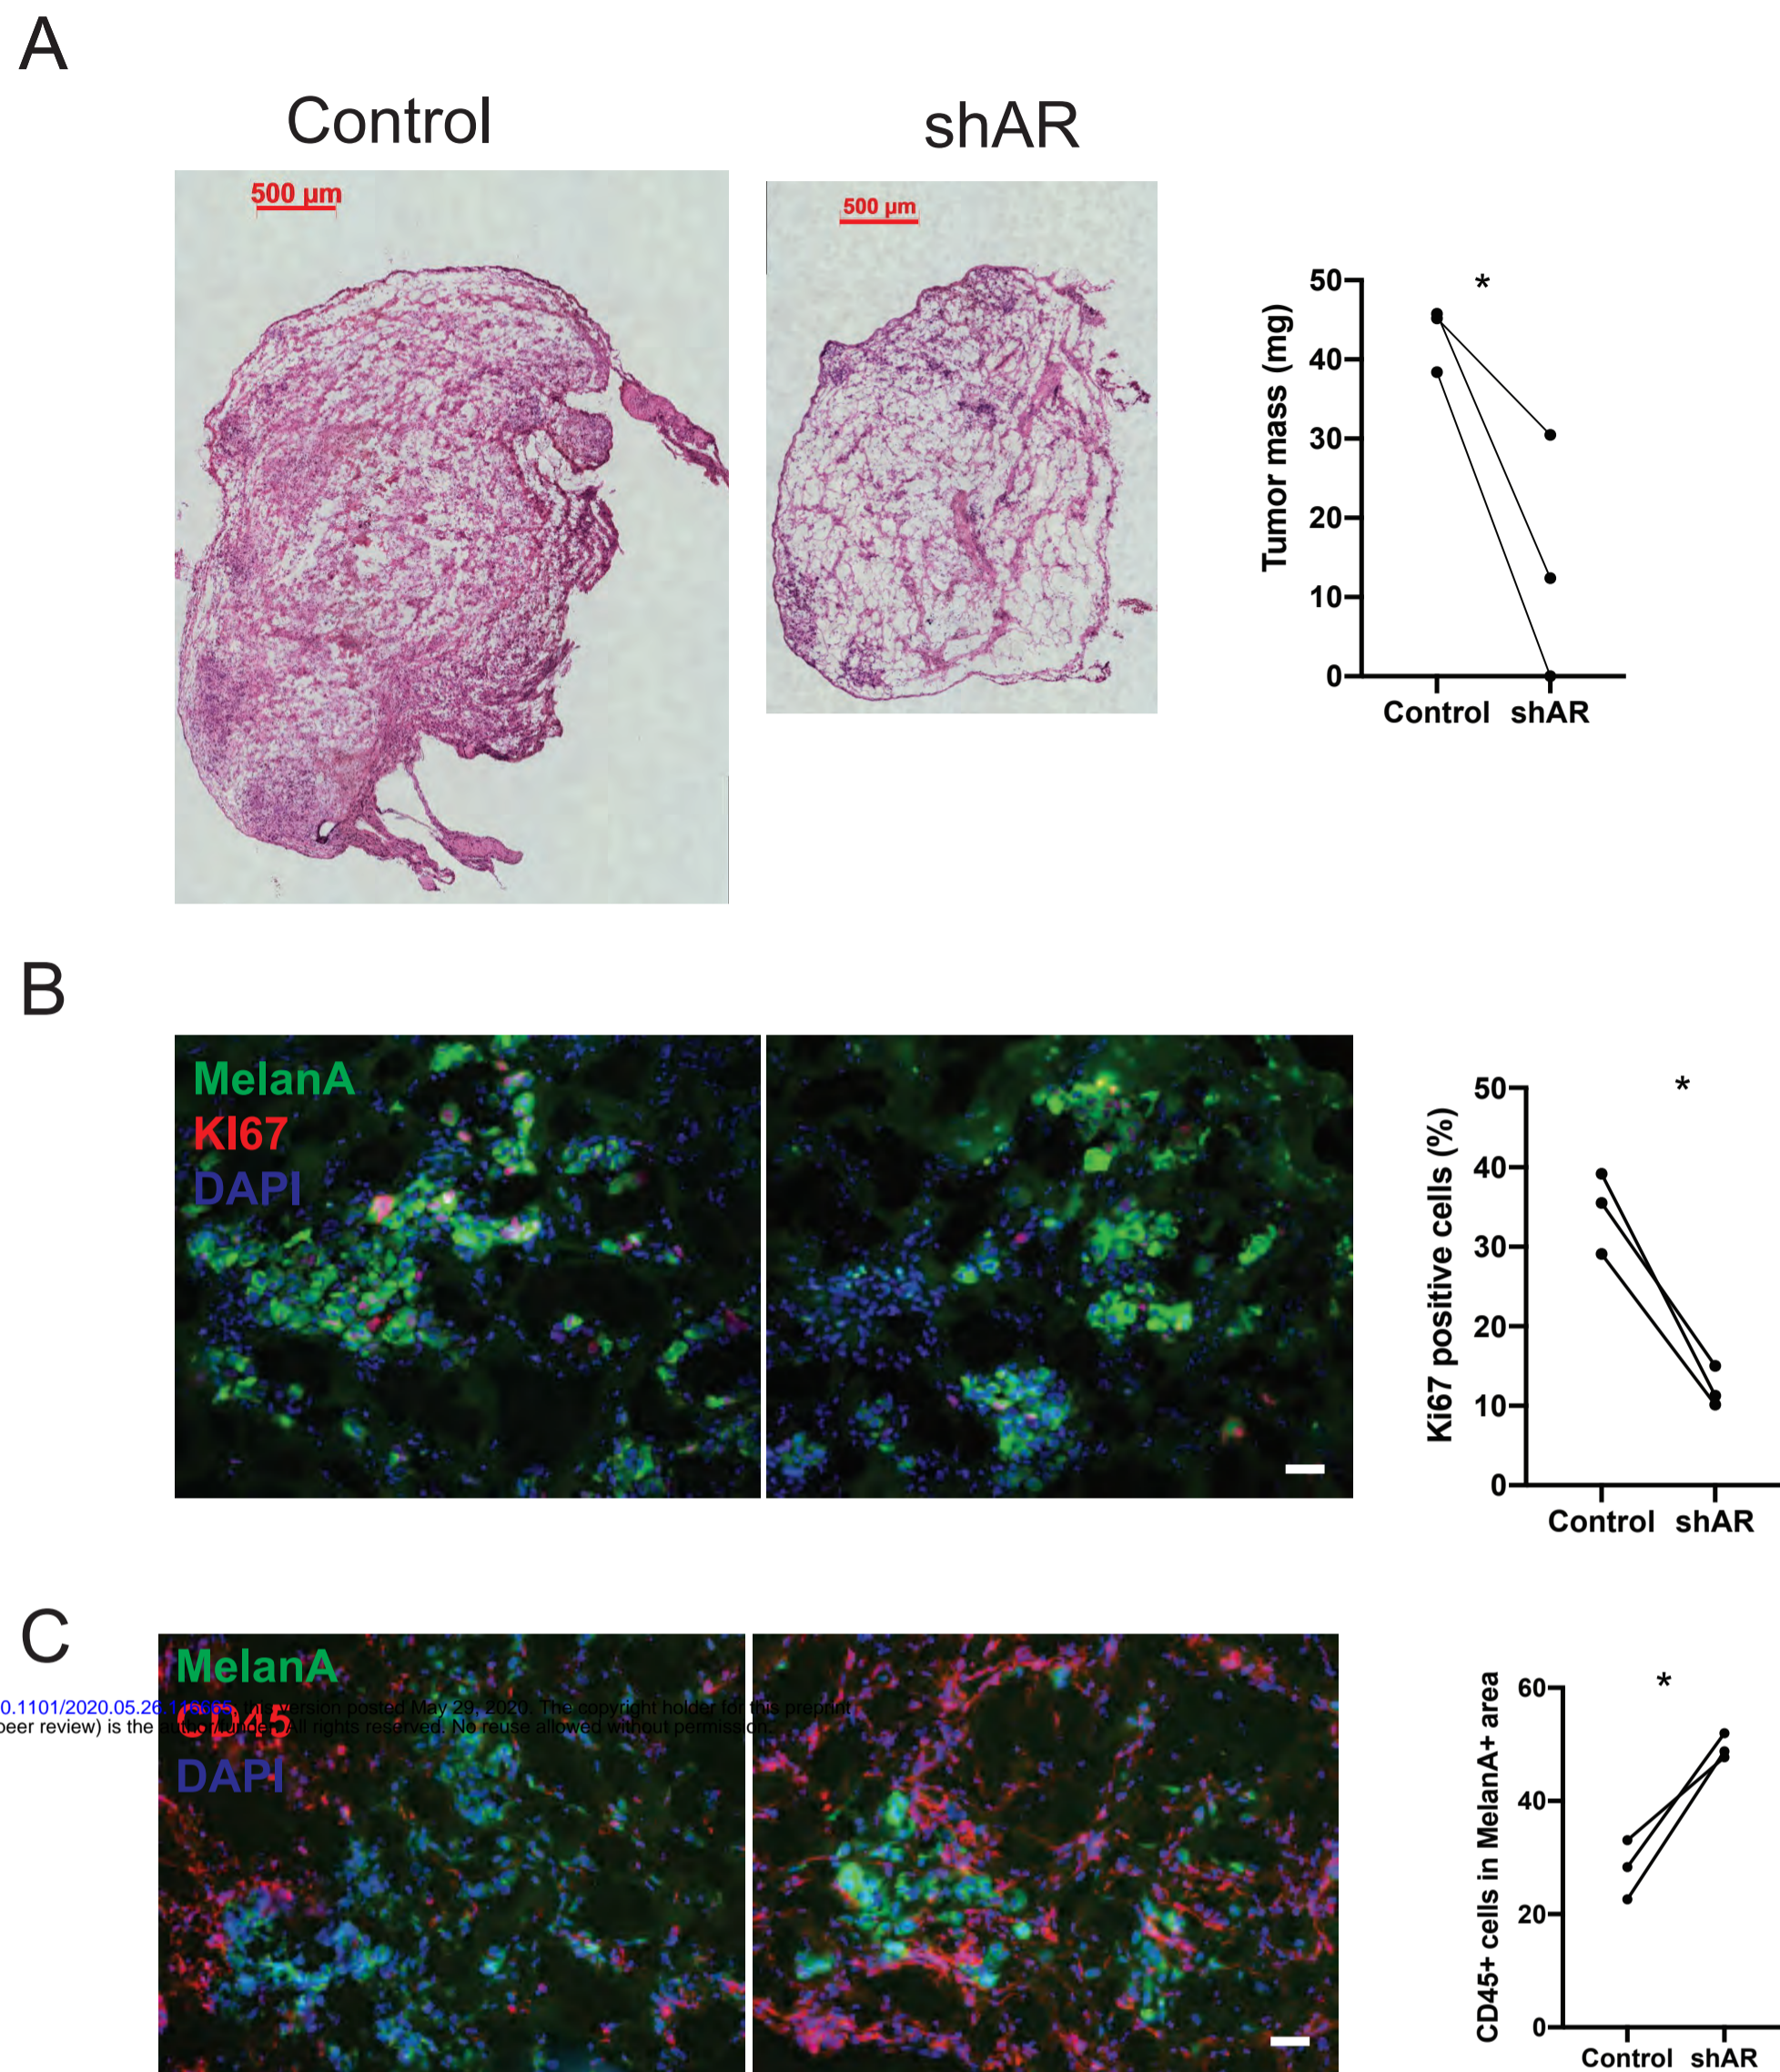

bioRxiv preprint doi: <https://doi.org/10.1101/2020.05.26.115575>; this version posted May 29, 2020. The copyright holder for this preprint (which was not certified by peer review) is the author/funder, who has granted bioRxiv a license to display the preprint in perpetuity. It is made available under aCC-BY 4.0 International license.

**Supplementary Figure 17. Related to Figure 7. AR silencing inhibits SKMEL28 melanoma tumorigenesis.** SKMEL28 melanoma cells infected with an AR-silencing virus versus vector control were tested by parallel intradermal Matrigel injections into NOD/SCID male and female mice (3 per group, male mice). Mice were sacrificed 16 days after injection. A) Tumor size, measured by digital caliper (mass = (length x width x height) \*  $\pi/6$ ) together with representative low magnification H/E images of the retrieved lesions. Scale bars: 100  $\mu\text{m}$ . B) Double immunofluorescence analysis of lesions with antibodies against MelanA (green), for melanoma cells identification, and KI67 positive cells. Shown are representative images of MelanA positive cells stained with antibodies against KI67, together with relative quantification, (counting in each case >50 cells in 3-5 fields on digitally-retrieved images, using ImageJ software). C) double immunofluorescence analysis of lesions with antibodies against MelanA, CD45 for melanoma cells, hematopoietic cells identification, respectively. Shown are representative images together with quantification of number of CD45 positive cells per MelanA positive tumor area, counting in each case 3-4 fields. n (control versus experimental lesions) = 6, two-tailed paired t test, \*P < 0.05. Scale bars: 10  $\mu\text{m}$ .

# Supplementary Figure 18

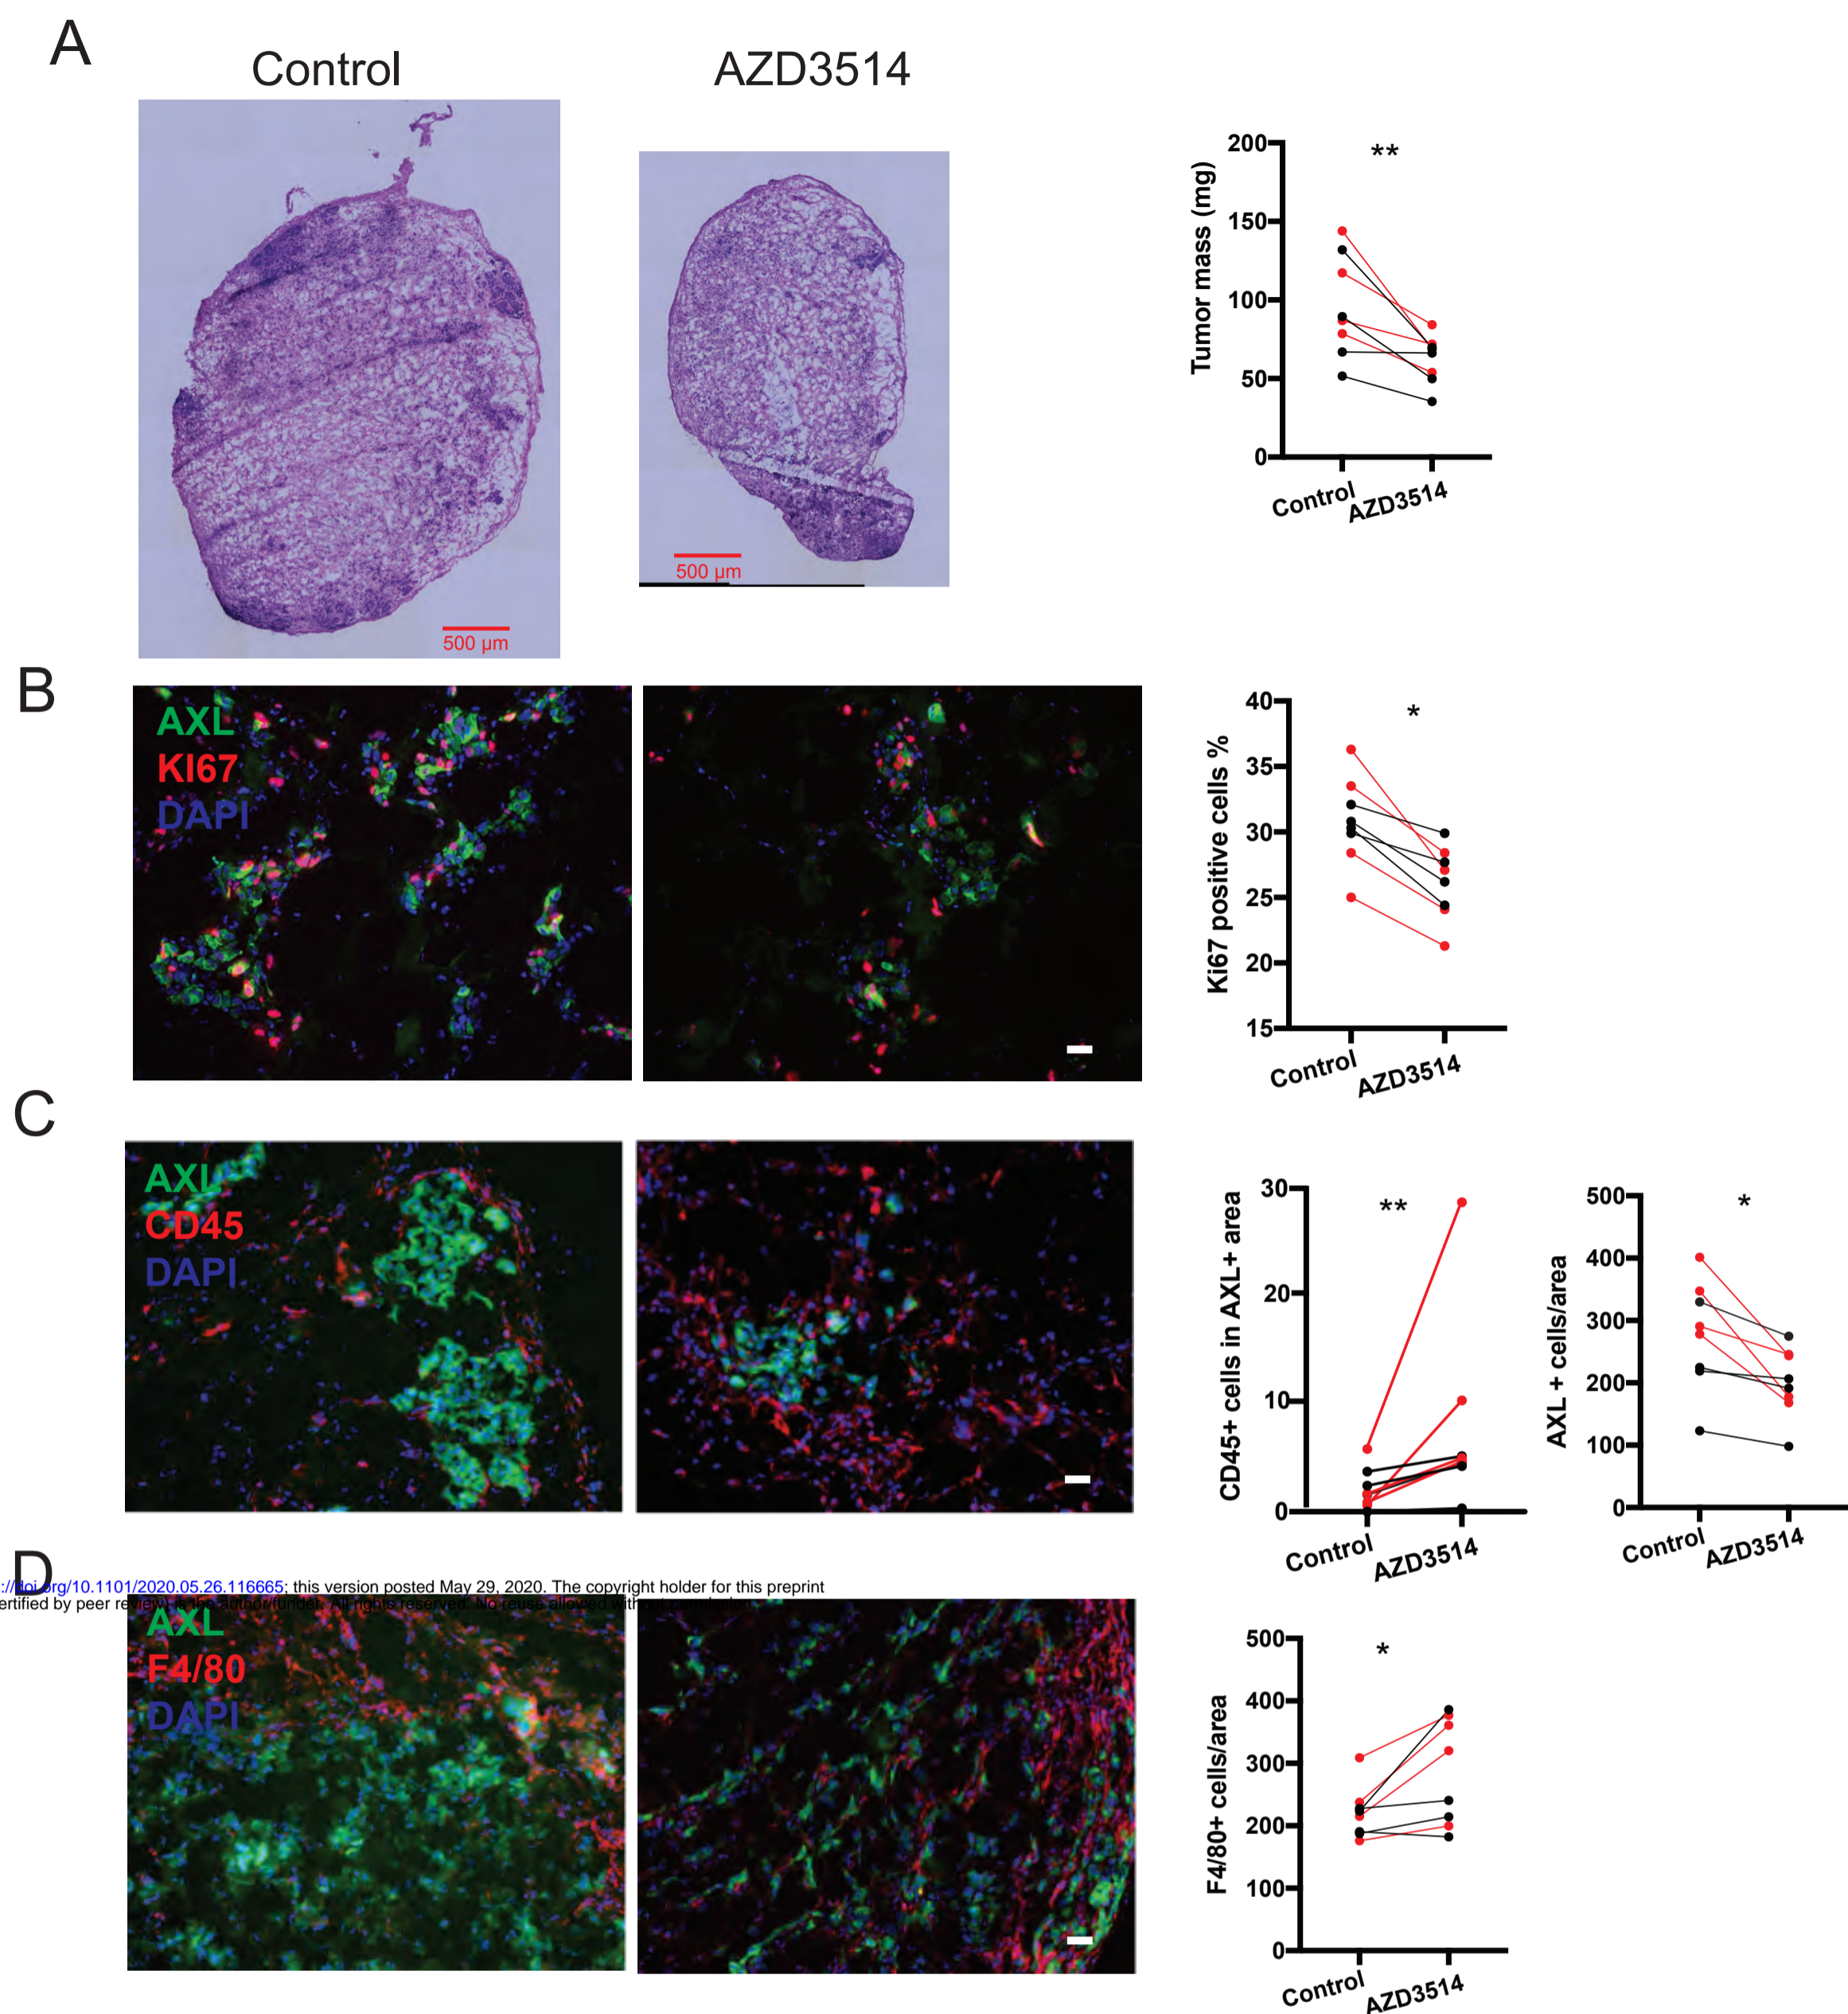

bioRxiv preprint doi: <https://doi.org/10.1101/2020.05.26.116665>; this version posted May 29, 2020. The copyright holder for this preprint (which was not certified by peer review) is the author/funder, who has granted bioRxiv a license to display the preprint in perpetuity. It is made available under aCC-BY 4.0 International license.

**Supplementary Figure 18. Related to Figure 8. AZD3514 pretreatment inhibits WM1366 melanoma tumorigenesis.** WM1366 melanoma cells pretreated with an AR inhibitor AZD3514 versus DMSO control were tested by parallel intradermal Matrigel injections into NOD/SCID male and female mice (4 per group, data of male mice in red). Mice were sacrificed 16 days after injection. A) Tumor size, measured by digital caliper (mass = (length x width x height) \*  $\pi$ /6) together with representative low magnification H/E images of the retrieved lesions. B): Double immunofluorescence analysis of lesions with antibodies against AXL (green), for melanoma cells identification, and KI67 positive cells. Shown are representative images of AXL positive cells stained with antibodies against KI67, together with relative quantification, (counting in each case >50 cells in 3-5 fields on digitally-retrieved images, using ImageJ software). C) double immunofluorescence analysis of lesions with antibodies against AXL, CD45 and F4/80, for melanoma cells, hematopoietic cells as well as macrophages identification, respectively. Shown are representative images together with quantification of number of F4/80 positive cells per AXL positive tumor area, counting in each case 3-4 fields. n (control versus experimental lesions) = 16, two-tailed paired t test, \*P < 0.05; \*\* P < 0.01; \*\*\*P < 0.005. Scale bars: 10  $\mu$ m.

## Supplementary Figure 19

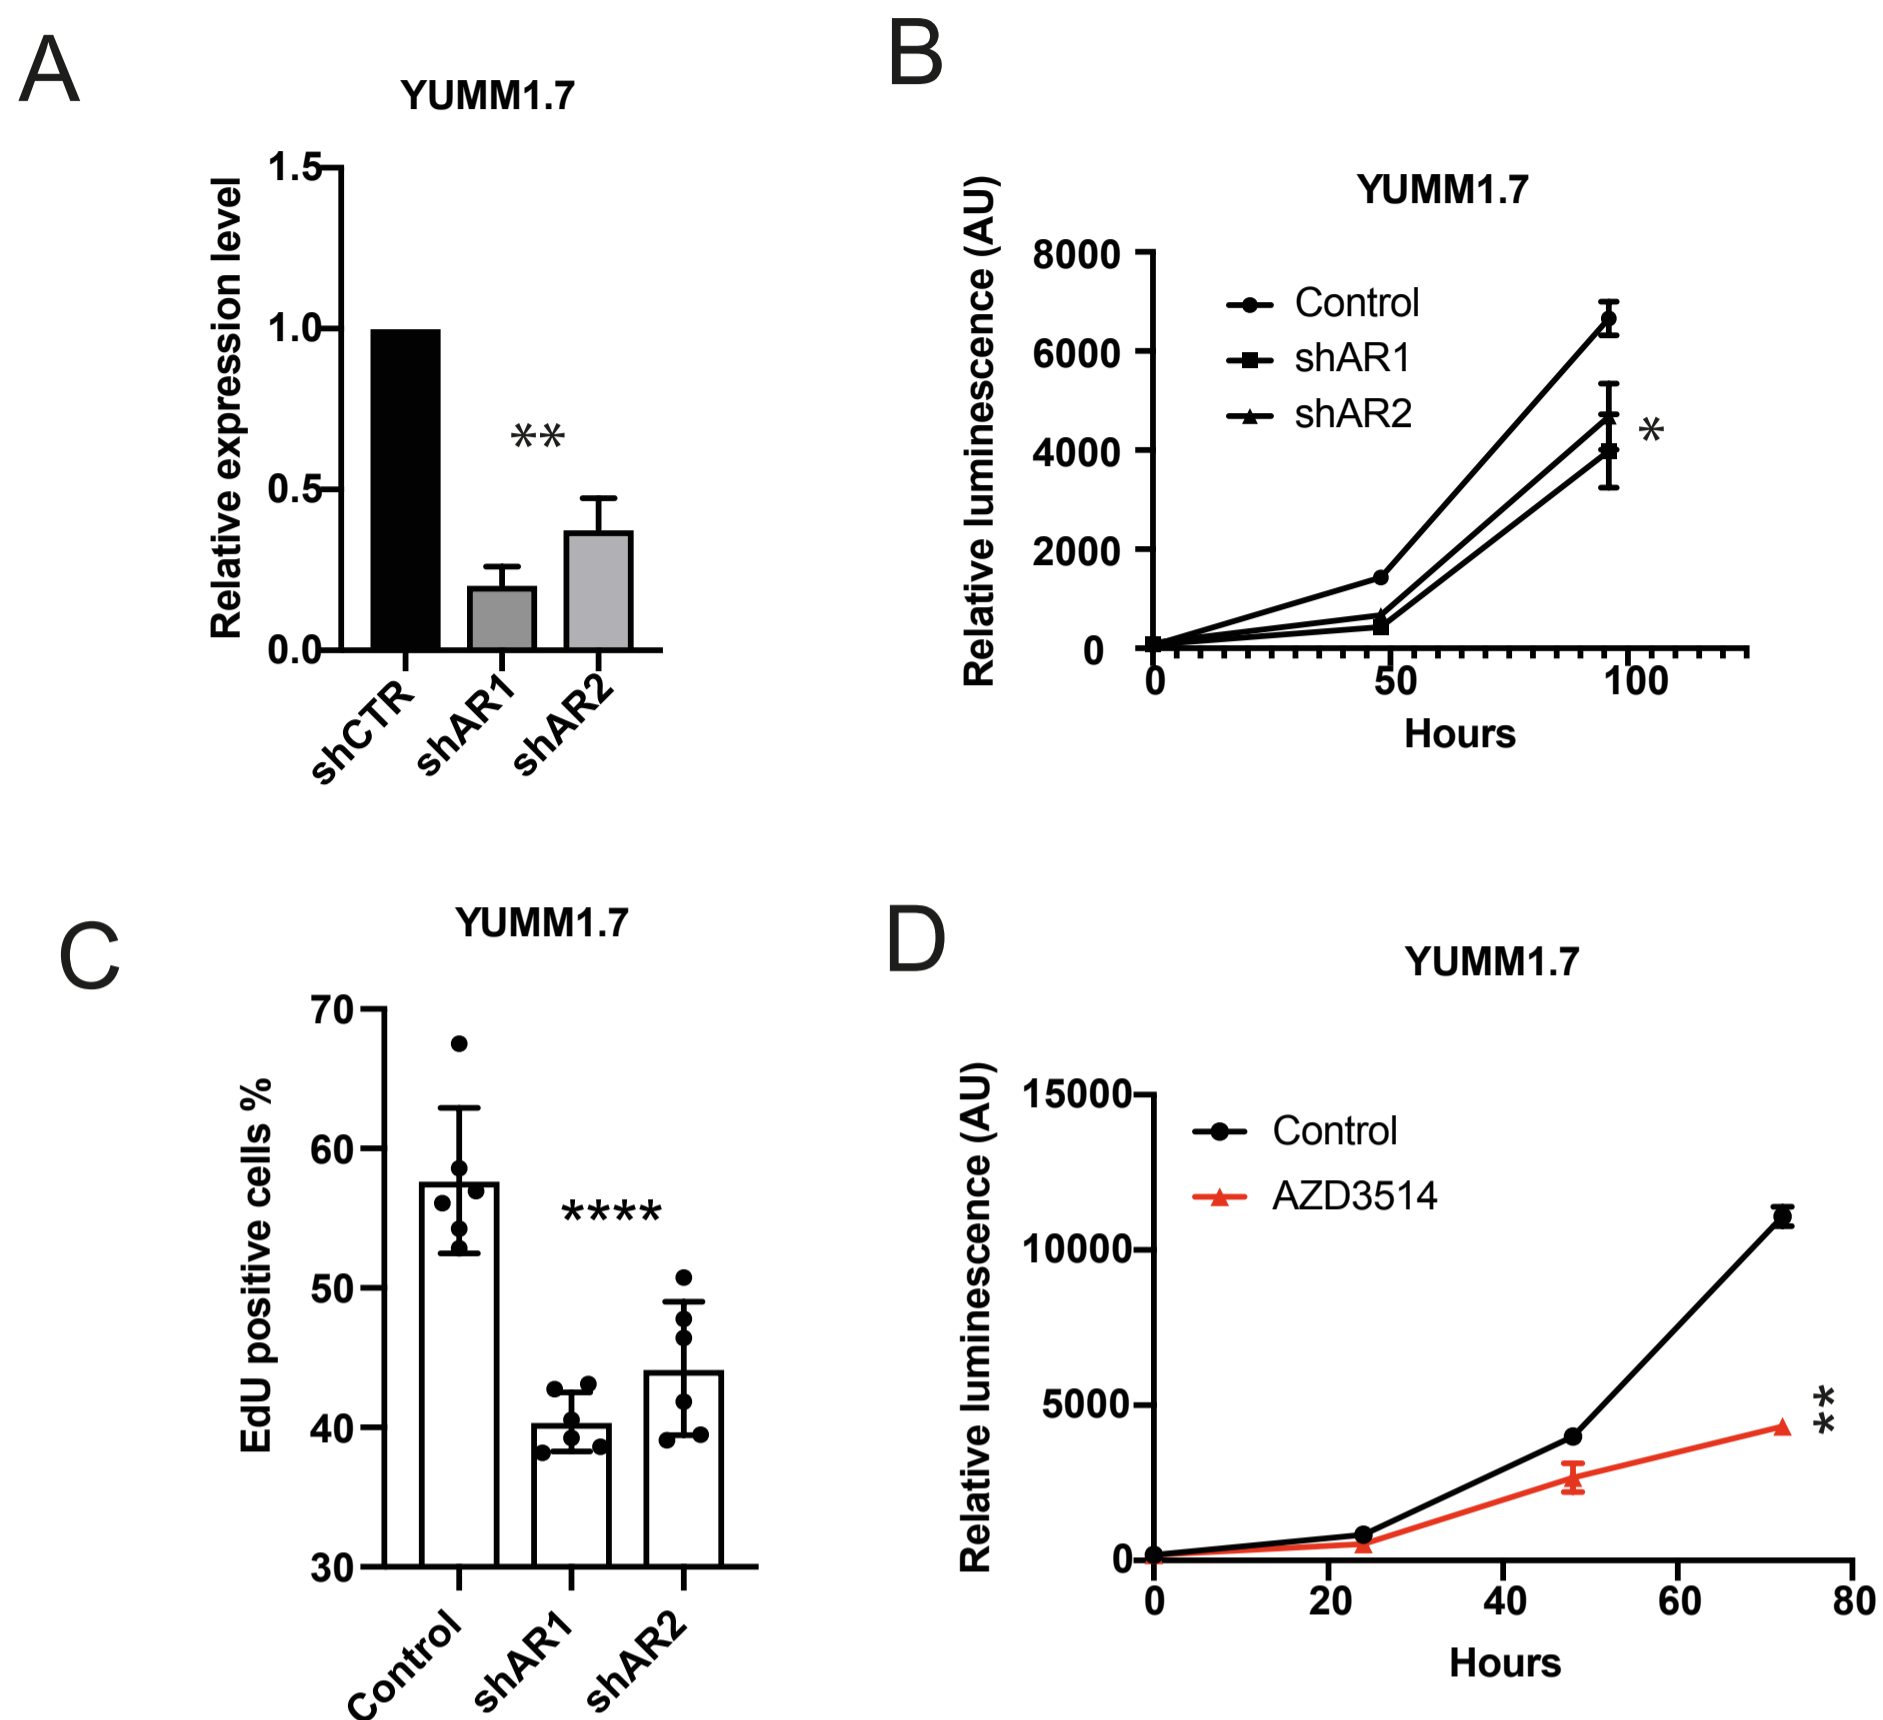

bioRxiv preprint doi: <https://doi.org/10.1101/2020.05.26.116665>; this version posted May 29, 2020. The copyright holder for this preprint (which was not certified by peer review) is the author/funder. All rights reserved. No reuse allowed without permission.

**Supplementary Figure 19. Related to Figure 9. Suppression of mouse melanoma proliferation by AR silencing.** A) Level of AR mRNA with shRNA mediated silencing of AR in mouse melanoma cell line YUMM1.7. B) Expression levels of AR mRNA in YUMM1.7 infected with 2 AR silencing lentiviruses versus empty control as assessed by RT-qPCR. Data are shown as mean  $\pm$  SD, 1-way ANOVA with Dunnett's test.  $n = 3$  biological replicates (experiments). C) Cell density assays were carried out with YUMM1.7 infected with two AR silencing lentiviruses versus empty vector control. Results are presented as luminescence intensity values relative to day 1. D) YUMM1.7 infected with two AR silencing lentiviruses versus empty vector control were tested by EdU labelling assay 5 days post virus infection. Data are shown as mean  $\pm$  SD, 1-way ANOVA with Dunnett's test.  $n = 3$  biological experiments. E) YUMM1.7 were plated on triplicate wells in 96-well dishes followed by CellTiter-Glo metabolic activity measurements at the indicated days after treatment of AZD3514. Results are presented as luminescence intensity values relative to day 1. Data are shown as mean  $\pm$  SD, 1-way ANOVA with Dunnett's test.  $n = 3$  biological replicates (experiments). \* $P < 0.05$ ; \*\*  $P < 0.01$ ; \*\*\*\* $P < 0.001$ .
